# Supplementary material
Source: publisher figshare collection journal article supplement (https://sage.figshare.com/ndownloader/files/20178989)
Supplement: Supplementary file 1 [file 20178989]

## Sheet: 工作表1
Basic information																	Protein abundance
No.	Gene.names	Peptides	Razor...unique.peptides	Unique.peptides	Sequence.coverage....	Unique...razor.sequence.coverage....	Unique.sequence.coverage....	Mol..weight..kDa.	Q.value	Score	Intensity	MS.MS.Count	iBAQ	Protein.IDs	Majority.protein.IDs	Protein.names	6h-0Gy-1	6h-0Gy-2	6h-0Gy-3	6h-0Gy-4	6h-2Gy-1	6h-2Gy-2	6h-2Gy-3	6h-2Gy-4	6h-2Gy-5	6h-5.5Gy-1	6h-5.5Gy-2	6h-5.5Gy-3	6h-5.5Gy-4	6h-5.5Gy-5	6h-7Gy-1	6h-7Gy-2	6h-7Gy-3	6h-7Gy-4	6h-7Gy-5	6h-8Gy-1	6h-8Gy-2	6h-8Gy-3	6h-8Gy-4	6h-8Gy-5	24h-0Gy-1	24h-0Gy-2	24h-0Gy-3	24h-0Gy-4	24h-0Gy-5	24h-2Gy-1	24h-2Gy-2	24h-2Gy-3	24h-2Gy-4
1	Igkv17-127;Igkv17-121	2	2	2	34.5	34.5	34.5	12.33	0	71.926	10300000000	327	5155300000	A0A075B5J9;A0A075B5K3;A0A0G2JFA8;A0A0G2JDN5	A0A075B5J9;A0A075B5K3;A0A0G2JFA8;A0A0G2JDN5		4.8091e+07	1.36141e+07	1.54994e+07	4.28099e+07	3.81642e+07	4.67179e+07	4.37874e+07	5.44711e+07	2.55549e+07	4.07626e+07	5.16845e+07	5.27655e+07	4.27831e+07	8.32768e+07	2.67154e+07	1.76283e+07	8.50836e+07	2.17179e+07	2.07886e+07	2.07908e+08	3.90363e+07	5.39257e+07	5.86333e+07	4.22018e+07	9.38495e+07	7.87467e+07	6.19704e+07	4.93281e+07	4.93617e+07	1.09603e+08	8.20324e+07	8.20772e+07	4.34819e+07
2	Igkv14-126	3	2	2	36.8	23.9	23.9	13.058	0	48.009	913160000	81	228290000	A0A075B5K0	A0A075B5K0		16747.7	16747.7	3.85199e+06	1.83292e+06	16747.7	16747.7	1.66618e+06	16747.7	4.54354e+06	2.79356e+07	16747.7	1.54862e+07	16747.7	3.33403e+06	16747.7	16747.7	3.61773e+06	16747.7	16747.7	1.0092e+06	16747.7	1.38642e+07	16747.7	1.26044e+06	7.11295e+06	1.32363e+06	4.86643e+06	1.73123e+06	16747.7	1.6364e+06	16747.7	3.92461e+06	737190
3	Igkv9-124	7	7	7	57.9	57.9	57.9	10.419	0	142.87	4215400000	283	1053800000	A0A075B5K2;A0A0G2JDR3	A0A075B5K2;A0A0G2JDR3		1.2632e+07	4.99848e+06	3.00508e+06	1.00802e+07	1.61528e+07	1.71752e+07	5.97048e+06	1.57255e+07	2.60501e+07	2.22102e+07	6.88637e+06	1.57625e+07	3.51221e+06	2.72151e+07	1.1685e+07	5.90455e+06	11003717	1.07748e+07	3.09973e+06	1.04244e+07	3.44122e+07	6.7485e+06	1.21665e+07	1.27822e+07	1.20138e+07	3.96341e+06	3.14507e+07	1.35259e+07	2.63853e+07	8.45512e+06	2.59916e+07	2.58027e+07	1.56549e+07
4	Igkv2-109	1	1	1	10.8	10.8	10.8	13.057	0.002331	6.9359	751020000	28	187750000	A0A075B5K6;P03976	A0A075B5K6;P03976	Ig kappa chain V-II region 17S29.1	16747.7	16747.7	16747.7	16747.7	16747.7	16747.7	16747.7	16747.7	16747.7	16747.7	16747.7	2.30237e+06	16747.7	4.01674e+06	16747.7	16747.7	16747.7	16747.7	16747.7	16747.7	16747.7	16747.7	2.3015e+06	16747.7	16747.7	16747.7	16747.7	16747.7	16747.7	16747.7	3.56531e+06	16747.7	16747.7
5	Igkv14-100	1	1	1	13.8	13.8	13.8	12.65	0	16.67	869080000	83	434540000	A0A075B5K7;A0A0G2JG36	A0A075B5K7;A0A0G2JG36		1.82946e+07	16747.7	7.80971e+06	1.14135e+07	1.19909e+06	6.84795e+06	1.19234e+07	3.59291e+06	3.72851e+06	6.34543e+06	16747.7	1.40148e+06	2.12908e+07	7.35903e+06	4.44878e+06	2.67229e+06	1.79004e+07	16747.7	5.19377e+06	1.85761e+07	2.61336e+06	5.92969e+06	16747.7	1.0328e+07	4.99587e+06	2.86574e+06	6.51811e+06	8.04676e+06	7.82994e+06	5.18622e+06	4.00514e+06	5.56944e+06	7.17473e+06
6	Igkv10-94	2	2	2	51.3	51.3	51.3	12.576	0	93.337	813200000	73	203300000	A0A075B5L1	A0A075B5L1		16747.7	16747.7	2.38003e+06	16747.7	16747.7	16747.7	1.28514e+06	16747.7	16747.7	1.59548e+06	2.06072e+06	1.74854e+06	16747.7	1.05886e+06	16747.7	16747.7	16747.7	16747.7	16747.7	4.48502e+06	16747.7	1.02765e+06	16747.7	16747.7	1.89585e+06	3.43559e+06	16747.7	16747.7	16747.7	2.64715e+06	2.36569e+06	1.34167e+06	1.35636e+06
7	Igkv4-91	3	2	2	32.8	23.5	23.5	12.724	0	55.849	392930000	32	196460000	A0A075B5L2;A0A0G2JH00	A0A075B5L2		16747.7	16747.7	3.29833e+06	16747.7	4.28054e+06	16747.7	7.37382e+06	6.90091e+06	6.04755e+06	16747.7	3.74868e+06	16747.7	16747.7	2.31794e+06	16747.7	16747.7	16747.7	16747.7	16747.7	16747.7	16747.7	7.70962e+06	16747.7	4.74335e+06	2.61649e+06	16747.7	16747.7	16747.7	16747.7	1.7166e+07	16747.7	16747.7	16747.7
8	Igkv4-80	1	1	1	13.8	13.8	13.8	12.562	0.0021739	5.0162	117310000	4	58655000	A0A075B5L7	A0A075B5L7		16747.7	16747.7	16747.7	16747.7	16747.7	16747.7	16747.7	16747.7	16747.7	16747.7	16747.7	16747.7	16747.7	16747.7	16747.7	3.77255e+06	3.22104e+06	2.4218e+06	16747.7	2.2245e+06	16747.7	1.35295e+06	16747.7	1.41527e+06	16747.7	16747.7	16747.7	16747.7	16747.7	16747.7	16747.7	16747.7	16747.7
9	Igkv4-63	3	2	2	48.4	27.4	27.4	10.157	0.002004	3.7402	81859000	8	20465000	A0A075B5M1;A0A0G2JFU6	A0A075B5M1;A0A0G2JFU6		16747.7	16747.7	16747.7	16747.7	16747.7	16747.7	16747.7	16747.7	16747.7	16747.7	16747.7	16747.7	16747.7	16747.7	16747.7	16747.7	16747.7	16747.7	16747.7	16747.7	16747.7	16747.7	16747.7	16747.7	16747.7	16747.7	16747.7	16747.7	16747.7	1.81548e+06	16747.7	7.45626e+06	996311
10	Igkv4-58	4	4	3	63.9	63.9	52.6	10.293	0	51.257	1665700000	95	555230000	A0A075B5M3;A0A0G2JGI6;P01680	A0A075B5M3;A0A0G2JGI6;P01680	Ig kappa chain V-IV region S107B	6.52263e+06	8.11793e+06	1.20901e+07	9.87692e+06	9.17585e+06	9.20953e+06	1.21804e+07	2.35608e+07	16747.7	4.57762e+06	1.5798e+07	7.92479e+06	1.51864e+06	1.6506e+07	6.52131e+06	4.9768e+06	16747.7	16747.7	5.52544e+06	7.5517e+06	7.92227e+06	1.18105e+07	16747.7	9.54537e+06	16747.7	1.17579e+07	16747.7	1.24844e+07	4.95885e+06	5.16845e+07	16747.7	16747.7	784578
11	Igkv4-57-1	2	1	1	26.9	13.4	13.4	12.723	0	45.382	370590000	49	92647000	A0A075B5M4	A0A075B5M4		1.91787e+06	16747.7	16747.7	16747.7	16747.7	16747.7	16747.7	16747.7	1.08103e+06	16747.7	976681	6.80884e+06	2.84681e+06	2.01821e+06	16747.7	16747.7	1.99639e+06	16747.7	16747.7	4.7208e+06	3.03056e+06	16747.7	16747.7	16747.7	16747.7	2.58429e+06	5.85568e+06	3.40242e+06	1.21864e+06	927181	16747.7	1.47918e+06	3.52427e+06
12	Igkv5-39	4	4	3	53.7	53.7	41.1	10.345	0	121.66	6138400000	355	2046100000	A0A075B5M7;A0A0G2JDV4;A0A0B4J1J1	A0A075B5M7;A0A0G2JDV4		4.28668e+07	4.26794e+06	6.76271e+06	1.35154e+07	2.40563e+07	2.21085e+07	3.08126e+07	6.71123e+07	5.91354e+06	3.78192e+07	2.4806e+07	3.47668e+07	4.1715e+07	2.66261e+07	3.57131e+07	9.23024e+06	3.10599e+07	3.33496e+07	1.59244e+07	1.51558e+07	2.10612e+07	114055275	3.0602e+07	1.59395e+07	1.41458e+07	6.27446e+07	2.28546e+07	2.46916e+07	3.95357e+07	1.25663e+07	3.28369e+07	1.13646e+07	1.70195e+07
13	Igkv12-38	4	4	4	54.4	54.4	54.4	12.428	0	20.011	125700000	15	31424000	A0A075B5M8;A0A0G2JEI7	A0A075B5M8;A0A0G2JEI7		686275	16747.7	16747.7	16747.7	16747.7	16747.7	16747.7	16747.7	16747.7	16747.7	16747.7	2.85775e+06	3.20502e+06	1.56827e+06	16747.7	16747.7	16747.7	16747.7	16747.7	2.39398e+06	16747.7	16747.7	16747.7	16747.7	16747.7	16747.7	1.20076e+06	16747.7	16747.7	1.74113e+06	896611	16747.7	16747.7
14	Igkv6-29	3	1	1	34.2	18.4	18.4	12.579	0	41.889	1666800000	48	333370000	A0A075B5N2;A0A0G2JEI6;A0A075B5N1;A0A0G2JDJ8;P01632	A0A075B5N2;A0A0G2JEI6		1.65665e+07	16747.7	16747.7	16747.7	16747.7	16747.7	16747.7	6.14337e+06	6.57371e+06	3.99191e+06	16747.7	8.63049e+06	1.17037e+07	8.70474e+06	16747.7	1.21904e+06	2.83577e+06	1.81923e+06	1.0632e+07	1.78469e+07	2.28728e+06	3.00551e+06	3.82966e+06	3.25235e+06	2.335e+06	3.65397e+06	16747.7	759557	16747.7	4.17806e+06	2.14154e+06	4.78452e+06	4.87615e+06
15	Igkv8-28	5	4	3	53.5	53.5	41.6	10.903	0	74.069	1842500000	205	368490000	A0A075B5N3;A0A0G2JE47	A0A075B5N3;A0A0G2JE47		1.04043e+07	1.50769e+06	2.11042e+06	4.78925e+06	1.6073e+06	1.65028e+06	2.65077e+06	6.76145e+06	4.12045e+06	1.09572e+07	6.27628e+06	1.43513e+07	3.76086e+06	1.97613e+06	16747.7	1.16396e+06	7.10934e+06	8.20727e+06	3.36768e+06	1.97133e+07	3.13337e+06	7.56487e+06	1.2943e+06	1.21491e+07	16747.7	1.21943e+06	1.06109e+06	16747.7	6.45517e+06	5.58633e+06	2.09293e+06	2.40747e+06	2.8942e+07
16	Igkv8-27	5	5	3	54	54	45	10.976	0	220.73	11800000000	390	2353300000	A0A075B5N4;A0A0G2JF28	A0A075B5N4;A0A0G2JF28		3.04026e+07	3.92711e+06	2.37577e+07	2.88741e+07	1.93139e+07	2.07886e+07	3.02451e+07	2.30528e+07	1.70801e+07	3.68648e+07	3.35374e+07	4.72258e+07	3.0293e+07	3.16751e+07	2.47702e+07	6.70287e+06	2.3471e+07	7.4445e+06	1.08832e+07	1.71688e+07	9.04731e+06	2.80087e+07	1.78739e+07	24920876	2.72591e+07	3.73173e+07	3.31961e+07	1.9939e+07	3.6302e+07	4.22643e+07	6.54938e+07	5.12652e+07	4.47786e+07
17	Igkv6-13	5	5	2	54.7	54.7	31.6	10.44	0	36.707	7081800000	323	1416400000	A0A075B5N7;A0A0G2JGY3	A0A075B5N7;A0A0G2JGY3		1.3879e+07	8.56372e+06	1.08384e+07	3.0646e+07	1.15468e+07	1.1527e+07	2.32876e+07	2.09285e+07	1.49515e+07	1.58317e+07	2.61732e+07	3.10171e+07	2.86841e+07	3.06153e+07	7.32002e+06	8.17762e+06	3.05014e+07	5.66972e+06	1.461e+07	4.39801e+07	2.0295e+07	2.14267e+07	3.80888e+07	3.12671e+07	3.36851e+07	1.93545e+07	1.97987e+07	2.07886e+07	3.32966e+07	3.2616e+07	4.58246e+07	2.33137e+07	1.53603e+07
18	Igkv3-7	3	2	2	55.6	37.4	37.4	10.856	0	49.773	1610000000	139	536340000	A0A075B5N9;A0A0G2JE31;P01674	A0A075B5N9;A0A0G2JE31		1.06125e+07	1.74389e+07	2.06305e+06	3.55092e+06	3.18588e+06	3.13858e+06	8.56195e+06	1.39518e+07	7.79e+06	1.11866e+07	8.24714e+06	1.03113e+07	1.12646e+07	7.65132e+06	1.3736e+06	758303	1.29034e+07	2.47639e+06	1.55429e+06	1.33753e+07	2.81766e+06	4.52799e+06	5.45475e+06	5.80659e+06	2.6754e+06	2.19454e+07	16747.7	1.03767e+07	1.52685e+07	2.37593e+07	4.15551e+06	16747.7	16747.7
19	Igkv3-1	3	3	3	60.5	60.5	60.5	12.972	0	171.76	434670000	34	217340000	A0A075B5P1	A0A075B5P1		16747.7	16747.7	16747.7	16747.7	5.00751e+06	4.98576e+06	6.95944e+06	1.71398e+07	16747.7	2.46021e+06	16747.7	2.80864e+06	16747.7	16747.7	16747.7	1.87901e+07	16747.7	16747.7	16747.7	2.03615e+06	16747.7	16747.7	2.59871e+07	16747.7	16747.7	5.48955e+06	16747.7	16747.7	2.92655e+06	2.90194e+06	16747.7	1.21483e+06	16747.7
20	Ighg2b;Igh-3	26	26	24	61.9	61.9	56.2	36.568	0	323.31	160000000000	3736	13400000000	A0A075B5P3;P01867;A0A0A6YVP0;P01863;P01865	A0A075B5P3;P01867	Ig gamma-2B chain C region	1.53014e+08	1.90216e+07	6.62602e+07	1.28425e+08	8.96168e+07	9.35844e+07	1.44824e+08	1.73904e+08	5.93062e+07	1.15718e+08	4.46807e+07	7.32843e+07	3.7808e+07	107456533	3.9599e+07	3.84068e+07	9.49017e+07	3.99875e+07	5.26393e+07	2.84343e+08	1.07366e+08	9.84519e+07	2.54853e+08	9.62839e+07	1.28781e+08	289627834	2.24273e+08	1.979e+08	2.08972e+08	3.05354e+08	272733478	1.93323e+08	2.1571e+08
21	Ighg1	24	24	7	74.1	74.1	28.4	35.633	0	323.31	541000000000	5456	41600000000	A0A075B5P4;A0A0A6YWR2	A0A075B5P4;A0A0A6YWR2		6.21364e+08	1.63459e+08	3.77229e+08	6.61765e+08	6.20435e+08	6.01283e+08	4.98097e+08	737582785	4.69958e+08	5.25993e+08	4.7334e+08	8.36151e+08	5.11477e+08	8.15481e+08	2.6794e+08	3.31546e+08	8.56668e+08	249331331	3.85257e+08	9.04882e+08	3.74907e+08	6.36527e+08	4.29158e+08	6.30525e+08	6.74516e+08	8.00275e+08	4.76594e+08	4.09325e+08	7.33827e+08	9.26239e+08	5.6614e+08	7.52785e+08	4.65166e+08
22	Ighm	40	40	40	58.5	58.5	58.5	49.943	0	323.31	511000000000	6505	24400000000	A0A075B5P6;A0A075B6A0;P01872	A0A075B5P6;A0A075B6A0;P01872	Ig mu chain C region	3.50353e+08	2.51684e+08	3.46971e+08	2.28976e+08	2.21148e+08	2.49156e+08	3.22889e+08	3.82448e+08	2.69418e+08	7.8371e+08	2.51076e+08	4.43761e+08	3.19213e+08	3.92305e+08	3.08846e+08	2.29395e+08	372605796	2.02818e+08	1.86595e+08	5.13791e+08	4.37673e+08	3.45208e+08	2.24173e+08	3.13283e+08	3.14958e+08	1.74514e+08	2.95568e+08	2.91621e+08	157727254	2.51076e+08	3.42467e+08	3.7029e+08	2.05269e+08
23	Ighv2-2	1	1	1	13.8	13.8	13.8	12.578	0	35.838	538340000	70	179450000	A0A075B5P8	A0A075B5P8		5.58078e+06	1.38543e+06	861704	5.38483e+06	451258	16747.7	1.59248e+06	1.55767e+06	1.95618e+06	2.25243e+06	608512	16747.7	16747.7	16747.7	16747.7	16747.7	3.48501e+06	16747.7	16747.7	2.26049e+06	16747.7	1.76595e+06	2.5807e+06	2.57131e+06	1.78183e+06	8.14875e+06	1.22701e+06	16747.7	16747.7	2.49627e+06	5.75975e+06	2.27276e+06	8.08107e+06
24	Ighv5-4	5	4	3	57.3	47.9	31.6	12.965	0	16.22	2276900000	172	379480000	A0A075B5P9	A0A075B5P9		16747.7	16747.7	4.65443e+06	3.98608e+06	1.85104e+06	3.08637e+06	7.99181e+06	4.42795e+06	1.28824e+06	1.01154e+06	2.75182e+06	1.38571e+07	1.00627e+07	5.98147e+06	4.12532e+06	1.44542e+07	5.11116e+06	16747.7	1.25235e+06	4.80632e+06	1.89989e+06	5.40568e+06	3.00523e+06	1.52198e+06	4.57536e+06	3.79622e+06	2.47938e+06	2.84285e+06	3.67347e+06	1.49148e+07	7.49501e+06	6.40078e+06	16747.7
25	Ighv5-12	5	4	2	48.7	48.7	18.8	13.075	0	38.233	1655200000	141	236460000	A0A075B5Q4	A0A075B5Q4		1.24407e+06	1.31745e+06	1.12498e+06	4.53828e+06	858847	1.0653e+06	1.77503e+06	1.74462e+06	1.16505e+06	3.71734e+06	4643967	2.61398e+06	5.8918e+06	1.70992e+06	1.81472e+06	1.25235e+06	6.4676e+06	2.82984e+06	3.67347e+06	6.32947e+06	2.98091e+06	1.32353e+06	2.74671e+06	8.42788e+06	1.25235e+06	3.3567e+06	3.34385e+06	2.78988e+06	727635	5.38106e+06	4.90649e+06	3.64424e+06	4.96026e+06
26	Ighv2-9	3	2	2	42.2	33.6	33.6	12.477	0	15.942	143460000	27	47819000	A0A075B5Q5	A0A075B5Q5		16747.7	16747.7	16747.7	16747.7	16747.7	16747.7	733351	16747.7	16747.7	1.30012e+06	16747.7	16747.7	16747.7	16747.7	1.34269e+06	16747.7	1.91402e+06	630966	16747.7	16747.7	1.29378e+06	1.18068e+06	16747.7	16747.7	16747.7	16747.7	16747.7	16747.7	16747.7	16747.7	16747.7	16747.7	693513
27	Ighv5-9-1	4	3	2	49.1	32.8	23.3	13.067	0	26.092	1298800000	103	216470000	A0A075B5Q6;A0A0A6YVS4	A0A075B5Q6;A0A0A6YVS4		4.88366e+06	16747.7	16747.7	252729	16747.7	16747.7	359459	16747.7	16747.7	16747.7	259026	7.07865e+06	1.94039e+06	16747.7	159174	16747.7	437612	16747.7	16747.7	2.79538e+06	4.79291e+06	8.95472e+06	16747.7	3.31019e+06	1.4525e+06	889851	6.63213e+06	1.77314e+06	1.55429e+06	2.5913e+06	234579	4.22509e+06	16747.7
28	Ighv5-16	6	6	6	72.4	72.4	72.4	13.217	0	263.03	8485600000	351	1414300000	A0A075B5R0;A0A0B4J1P4	A0A075B5R0;A0A0B4J1P4		2.25573e+07	16747.7	5.43293e+06	1.31969e+07	232646	7.30307e+06	1.0967e+07	9.53864e+06	4.80857e+06	1.84863e+07	9.99876e+06	1.63895e+07	7.32203e+06	1.17912e+07	1.31987e+07	2.30021e+06	2.17137e+07	3.01901e+06	1.42732e+07	1.68324e+07	1.46205e+07	5.2148e+06	4.48789e+07	2.73787e+07	1.73139e+07	1.23418e+07	6.25001e+06	9.08274e+06	1.13954e+07	9.18725e+06	1.6611e+07	2.12e+07	1.39353e+07
29	Ighv5-17	6	6	5	63.2	63.2	53.8	12.905	0	66.247	5528200000	165	921360000	A0A075B5R1;P01783	A0A075B5R1		6.88837e+06	2.46959e+06	1.18215e+07	2.55495e+06	3.77639e+06	3.94885e+06	1.34378e+07	7.9655e+06	4.29092e+06	1.21068e+06	7.9057e+06	1.94051e+07	2.64886e+07	9.07509e+06	2.56665e+06	6.04068e+06	8.00069e+06	16747.7	1.16285e+06	4.08422e+06	2.37787e+06	5.81481e+06	1.31419e+07	9.33824e+06	1.67113e+06	1.20409e+07	7.86827e+06	4.76729e+06	1.49297e+07	2.57145e+07	8.38303e+06	8.28929e+06	9.22456e+06
30	Ighv7-3;Ighv7-2	2	2	2	16.7	16.7	16.7	13.457	0.0022523	5.5877	110110000	25	22023000	A0A075B5R2;A0A075B5R3;A0A0A6YX91;P01786	A0A075B5R2;A0A075B5R3;A0A0A6YX91;P01786	Ig heavy chain V region MOPC 47A	16747.7	16747.7	16747.7	16747.7	16747.7	16747.7	16747.7	16747.7	16747.7	16747.7	16747.7	1.12924e+06	16747.7	16747.7	16747.7	16747.7	16747.7	16747.7	16747.7	16747.7	16747.7	16747.7	16747.7	16747.7	16747.7	16747.7	16747.7	16747.7	16747.7	2.06072e+06	998503	770112	16747.7
31	Ighv14-1	6	3	2	37.6	21.4	21.4	12.991	0	82.789	1814500000	121	362900000	A0A075B5R4	A0A075B5R4		865384	16747.7	16747.7	6.07336e+06	16747.7	3.5674e+06	755782	1.6028e+07	835543	16747.7	6.62654e+06	3.06207e+06	2.95332e+06	1.88742e+07	2.33516e+06	1.07874e+06	9.13792e+06	16747.7	5.89543e+06	4.27369e+07	2.46714e+06	5.71124e+06	4.86085e+06	3.08488e+06	5.50841e+06	2.15027e+06	1.33124e+06	1.3151e+06	3.52427e+06	1.61011e+07	4.40483e+06	3.71383e+06	2.61336e+06
32	Ighv4-1	8	8	7	69.8	69.8	69.8	12.874	0	168.95	6746800000	323	843350000	A0A075B5R5;P01806;P01812;P01808;P01807;P01809;P01810;A0A0A6YWG4	A0A075B5R5;P01806;P01812;P01808;P01807	Ig heavy chain V region 441;Ig heavy chain V region MOPC 173;Ig heavy chain V region T601;Ig heavy chain V region X44	4.09717e+06	16747.7	1.98367e+07	3.09448e+06	2.09245e+06	2.31794e+06	1.01294e+07	1.03643e+07	1.20409e+07	1.41566e+07	1.81894e+07	1.11547e+07	8.77198e+06	3.79505e+06	2.28675e+06	1.08083e+07	7.84606e+06	4.84605e+06	2.41683e+06	5.3978e+06	2.31347e+07	1.5518e+07	5.78181e+06	6.75073e+06	2.18575e+07	3.28889e+06	1.5e+07	3.56119e+07	4.86526e+06	6.40449e+06	1.24464e+07	1.54327e+07	1.02368e+07
33	Ighv11-2;Ighv11-1	4	4	4	42.7	42.7	42.7	13.167	0	67.278	208670000	21	34779000	A0A075B5R8;A0A075B5R6	A0A075B5R8;A0A075B5R6		16747.7	16747.7	16747.7	16747.7	16747.7	16747.7	16747.7	16747.7	16747.7	1.33163e+07	16747.7	16747.7	16747.7	16747.7	16747.7	16747.7	284688	16747.7	16747.7	16747.7	16747.7	1.15626e+06	801473	316103	2.82229e+06	16747.7	16747.7	6.51773e+06	16747.7	16747.7	16747.7	16747.7	16747.7
34	Ighv14-2	10	10	7	64.1	64.1	47.9	13.002	0	125.02	13100000000	550	2627600000	A0A075B5R7	A0A075B5R7		8.9982e+07	1.4881e+07	8.36693e+06	6.29541e+07	1.58028e+07	1.27844e+07	2.43262e+07	4.85631e+07	2.39387e+07	3.97108e+07	4.89109e+06	6.52921e+07	4.06803e+07	5.53836e+07	1.55799e+07	1.57625e+07	1.02308e+08	16747.7	5.8032e+07	1.25821e+08	4.47786e+07	4.98667e+07	3.17005e+07	4.58287e+07	2.56662e+07	4.0667e+07	3.02947e+07	2.35489e+07	3.43192e+07	7.26148e+07	3.19256e+07	2.68269e+07	1.11084e+07
35	Ighv9-1	4	4	3	49	49	36.7	11.089	0	67.259	1567200000	113	313440000	A0A075B5S1;A0A0B4J1P3	A0A075B5S1;A0A0B4J1P3		1.61959e+06	817463	8.15146e+06	1.87031e+06	5.82798e+06	4.70795e+06	5.11973e+06	6.62921e+06	16747.7	4.3515e+06	5.58633e+06	838264	16747.7	16747.7	6.26695e+06	1.79253e+06	6.08924e+06	543765	1.83982e+06	1092089	5.46527e+06	2.55402e+06	2.43651e+06	2.62337e+06	6.21342e+06	9.00339e+06	3.27827e+06	16747.7	16747.7	9.99876e+06	1.4089e+06	6.15498e+06	1.60302e+06
36	Ighv14-4	4	3	3	43.2	43.2	43.2	12.134	0	54.346	2261900000	102	452370000	A0A075B5S3;A0A0A6YVR1	A0A075B5S3;A0A0A6YVR1		1.49846e+07	16747.7	3.11115e+06	4.96246e+06	7.57093e+06	1.01034e+07	3.69888e+06	3.79561e+06	1.32363e+06	1.9525e+07	8.6337e+06	5.55222e+07	1.89976e+06	6.47015e+06	2.67936e+06	16747.7	2.74343e+06	1.6491e+06	6.17788e+06	1.74942e+06	3.59081e+06	3.15703e+06	5.15361e+06	16747.7	1.44153e+07	2.24484e+06	5.49982e+06	16747.7	2.41683e+06	1.32022e+07	4.64538e+06	1.63829e+07	8.27452e+06
37	Ighv3-1	3	2	2	26.7	12.9	12.9	13.109	0	8.3766	710270000	97	177570000	A0A075B5S6	A0A075B5S6		16747.7	16747.7	2.95347e+06	2.76898e+06	16747.7	16747.7	4.35716e+06	1.94615e+06	2.0009e+06	16747.7	16747.7	1.20035e+06	16747.7	1.78356e+06	433114	16747.7	16747.7	16747.7	16747.7	16747.7	16747.7	4.00959e+06	1.38746e+06	2.47894e+06	1.08022e+07	2.53331e+06	16747.7	16747.7	7.64823e+06	6.75301e+06	1.02165e+07	680773	2.67151e+06
38	Ighv6-3	5	5	3	43.2	43.2	20.3	13.259	0	23.043	144690000	37	18086000	A0A075B5T2;A0A0A6YWU3;P01803	A0A075B5T2		16747.7	16747.7	16747.7	1.08998e+06	16747.7	16747.7	16747.7	16747.7	16747.7	16747.7	16747.7	16747.7	16747.7	16747.7	16747.7	16747.7	1.65161e+06	16747.7	519130	16747.7	16747.7	16747.7	16747.7	16747.7	16747.7	16747.7	16747.7	16747.7	16747.7	1.04967e+06	2.77261e+06	16747.7	16747.7
39	Ighv1-4	2	1	0	38.5	17.9	0	13.109	0.0023364	6.9954	219840000	1	43969000	A0A075B5T4	A0A075B5T4		2.1353e+06	16747.7	16747.7	16747.7	16747.7	16747.7	16747.7	16747.7	16747.7	16747.7	16747.7	16747.7	16747.7	16747.7	16747.7	16747.7	16747.7	16747.7	16747.7	4.31922e+06	16747.7	16747.7	16747.7	16747.7	16747.7	16747.7	16747.7	16747.7	16747.7	2.54464e+06	16747.7	16747.7	16747.7
40	Ighv1-5	2	2	2	34.7	34.7	34.7	10.846	0	28.338	329910000	29	82477000	A0A075B5T5;A0A0A6YWG2	A0A075B5T5;A0A0A6YWG2		16747.7	16747.7	16747.7	16747.7	16747.7	16747.7	16747.7	16747.7	16747.7	16747.7	16747.7	16747.7	16747.7	16747.7	16747.7	16747.7	16747.7	16747.7	16747.7	3.1153e+06	16747.7	16747.7	16747.7	16747.7	2.56445e+06	16747.7	16747.7	16747.7	16747.7	4.33588e+06	3.42355e+06	2.4996e+06	2.81766e+06
41	Ighv10-3	7	4	4	60.5	41.2	41.2	13.544	0	29.634	309170000	40	51528000	A0A075B5T6	A0A075B5T6		16747.7	16747.7	16747.7	16747.7	16747.7	16747.7	1.22188e+06	16747.7	16747.7	16747.7	16747.7	16747.7	16747.7	16747.7	16747.7	16747.7	16747.7	16747.7	989502	16747.7	16747.7	16747.7	16747.7	16747.7	16747.7	16747.7	16747.7	16747.7	16747.7	16747.7	16747.7	16747.7	545552
42	Ighv1-9	4	4	4	62.9	62.9	62.9	12.931	0	70.761	4228700000	163	2114300000	A0A075B5T9;A0A0A6YW37	A0A075B5T9;A0A0A6YW37		2.09235e+07	16747.7	7.33468e+06	1.95608e+07	3.55316e+06	4.79954e+06	2.48471e+07	16747.7	2.78636e+07	2.49861e+07	1.61011e+07	3.1494e+07	2.01972e+07	2.89343e+07	2.85271e+07	2.27505e+07	2.93233e+07	16747.7	9.2725e+06	2.95023e+07	18035860	2.96812e+07	2.09259e+07	2.90806e+07	1.87106e+07	2.28748e+07	1.40898e+07	1.95001e+07	2.07886e+07	4.34033e+07	3.01529e+07	5.56372e+07	2.51755e+07
43	Ighv1-12	2	1	1	22.4	15.3	15.3	10.778	0	13.283	601190000	45	120240000	A0A075B5U0;A0A0A6YXJ9	A0A075B5U0;A0A0A6YXJ9		16747.7	16747.7	16747.7	16747.7	16747.7	16747.7	2.01269e+06	1.34374e+06	16747.7	16747.7	1.67102e+06	2.34881e+06	16747.7	1.92456e+07	2.827e+06	16747.7	16747.7	16747.7	2.26894e+06	9.82909e+06	16747.7	16747.7	16747.7	2.87487e+06	2.98679e+06	16747.7	1.09026e+06	2.13394e+06	16747.7	3.10726e+06	1.13743e+06	16747.7	16747.7
44	Ighv1-20	6	4	2	44	31.9	14.7	13.071	0	14.479	447910000	49	74651000	A0A075B5U6;A0A0A6YX66	A0A075B5U6;A0A0A6YX66		775888	16747.7	16747.7	16747.7	395822	16747.7	1.25235e+06	16747.7	16747.7	16747.7	16747.7	16747.7	16747.7	16747.7	16747.7	16747.7	16747.7	16747.7	16747.7	1.03507e+06	784578	16747.7	8.90134e+06	1.20464e+06	16747.7	16747.7	4.09963e+06	566710	16747.7	626251	1.05239e+06	3.30434e+06	16747.7
45	Ighv1-22	4	2	2	39.3	18.8	18.8	13.022	0.0023202	6.8895	843060000	47	168610000	A0A075B5U7;P01758	A0A075B5U7		2.34997e+06	1.09784e+06	1.29537e+06	5.06625e+06	16747.7	899742	4.20093e+06	16747.7	2.53331e+06	2.95194e+06	2.95633e+06	2.96462e+06	9.11298e+06	1.08651e+07	16747.7	16747.7	3.55013e+06	16747.7	2.5735e+06	16747.7	16747.7	16747.7	6.62804e+06	1.73485e+06	1.94553e+07	5.48955e+06	1.36397e+06	1.81305e+06	4.24115e+06	3.61638e+06	16747.7	2.85557e+06	3.03056e+06
46	Ighv1-31	7	3	0	53.1	19.4	0	10.966	0	74.024	12700000000	191	2113600000	A0A075B5V1;A0A0A6YWK5	A0A075B5V1;A0A0A6YWK5		3.21579e+07	9.41437e+06	1.94175e+07	2.12105e+07	1.48097e+07	1.79103e+07	3.73173e+07	1.67943e+07	1.05006e+07	6.46592e+07	1.93398e+06	1.70801e+07	3.68743e+07	3.24256e+07	8.91783e+06	4.17572e+06	4.83116e+06	1.81404e+07	1.32541e+06	3.18218e+07	1.62816e+07	3.02698e+07	3.52786e+07	4.00326e+07	6.05871e+07	3.15775e+07	4.40668e+07	3.76016e+07	2.2623e+07	2.78407e+07	6.03115e+07	2.53533e+07	2.27056e+07
47	Ighv1-34	6	1	1	41	12.8	12.8	13.032	0.0021413	4.8063	194300000	24	38859000	A0A075B5V2;L7N238	A0A075B5V2		1.03425e+06	16747.7	16747.7	693576	16747.7	16747.7	16747.7	16747.7	16747.7	16747.7	16747.7	16747.7	16747.7	16747.7	16747.7	16747.7	16747.7	16747.7	16747.7	16747.7	16747.7	16747.7	16747.7	16747.7	16747.7	1.38886e+06	16747.7	16747.7	363881	569454	950608	16747.7	16747.7
48	Ighv1-36	1	1	1	12.9	12.9	12.9	12.904	0.0020202	3.8116	173100000	18	86551000	A0A075B5V3;A0A0A6YXT2	A0A075B5V3;A0A0A6YXT2		16747.7	16747.7	16747.7	1.75631e+06	16747.7	16747.7	16747.7	1.0012e+06	16747.7	16747.7	16747.7	1.71327e+06	16747.7	2.49466e+06	1.4044e+06	16747.7	16747.7	16747.7	2.98416e+06	16747.7	16747.7	16747.7	16747.7	16747.7	2.24945e+06	16747.7	16747.7	16747.7	16747.7	16747.7	2.87988e+06	16747.7	2.21294e+06
49	Ighv1-39	2	2	2	29.9	29.9	29.9	12.93	0	69.442	2370000000	194	1190000000	A0A075B5V5	A0A075B5V5		5.90989e+06	7.09974e+06	7.97446e+06	6.46424e+06	16747.7	16747.7	6.46825e+06	1.92972e+07	16747.7	9.77665e+06	7.58953e+06	5.46371e+06	6.93342e+06	2.19614e+07	1.05155e+07	16747.7	2.81695e+07	4.18682e+06	3.15798e+06	8.4382e+06	3.25568e+07	2.68985e+07	1.35755e+06	5.48572e+06	1.29697e+07	1.46419e+07	9.26215e+06	1.69356e+06	1.75792e+06	2.66863e+07	3.56742e+07	1.37107e+07	2.83512e+07
50	Ighv1-42	8	4	2	86.7	53.1	35.7	10.776	0	43.673	210550000	29	35092000	A0A075B5V6;A0A0A6YY38	A0A075B5V6;A0A0A6YY38		668372	16747.7	16747.7	2.31794e+06	16747.7	619600	16747.7	16747.7	2.28475e+06	16747.7	2.23901e+06	4.66015e+06	16747.7	16747.7	16747.7	16747.7	1.46951e+06	16747.7	16747.7	16747.7	1.15334e+06	689909	416715	16747.7	16747.7	16747.7	16747.7	16747.7	16747.7	16747.7	16747.7	16747.7	674203
51	Ighv1-47	6	6	6	67.3	67.3	67.3	11.083	0	44.508	1411500000	112	235250000	A0A075B5V8;A0A0A6YY41	A0A075B5V8;A0A0A6YY41		2.8868e+06	16747.7	16747.7	16747.7	2.4861e+06	304495	16747.7	1.63497e+06	16747.7	3.52427e+06	16747.7	16747.7	2.14714e+06	2.74856e+06	16747.7	16747.7	16747.7	16747.7	16747.7	4.63611e+06	16747.7	1.95506e+06	2.21488e+07	9.95182e+06	16747.7	16747.7	4.68625e+06	965586	1.01825e+07	16747.7	16747.7	2.91432e+06	5.26925e+06
52	Ighv1-52	7	6	1	62.9	62.9	21.6	12.989	0	189.92	4067500000	261	1016900000	A0A075B5W2;A0A0A6YXC3	A0A075B5W2;A0A0A6YXC3		9.11253e+06	2.80864e+06	2.62892e+07	1.43824e+07	4.18748e+06	178481	1.05201e+07	2.2623e+07	1.30675e+07	1.74676e+07	6.03599e+06	1.80499e+07	1.58301e+07	2.04237e+07	5.44939e+06	3.48109e+06	2.64318e+07	16747.7	16747.7	3.45812e+07	5.36831e+06	1.1129e+07	6.39952e+06	1.30926e+07	1.35808e+07	1.85718e+07	2.3901e+07	4.42713e+06	8.87203e+06	1.40861e+07	2.65136e+07	1.45343e+07	1.59437e+07
53	Ighv1-54	3	2	2	60.7	34.2	34.2	12.75	0	40.695	742930000	66	148590000	A0A075B5W5	A0A075B5W5		1.80092e+06	2.0737e+06	1.93018e+06	1.35186e+06	16747.7	16747.7	1.17193e+06	16747.7	2.24484e+06	1.16285e+06	2.5913e+06	1.22311e+06	1.65712e+06	16747.7	1.21442e+06	16747.7	16747.7	16747.7	16747.7	16747.7	16747.7	16747.7	16747.7	16747.7	16747.7	16747.7	1.13059e+07	16747.7	803496	3.74868e+06	3.7072e+06	1.18605e+07	3.65696e+06
54	Ighv1-55	1	1	1	21.4	21.4	21.4	12.687	0	81.477	1160000000	92	582000000	A0A075B5W6	A0A075B5W6		7.17123e+06	16747.7	5.53897e+06	5.18022e+06	16747.7	4.45471e+06	3.7629e+06	16747.7	5.6725e+06	1.13954e+07	6.52295e+06	9.94466e+06	1.14698e+07	6.22311e+06	16747.7	16747.7	1.12377e+07	16747.7	16747.7	1.89244e+07	6.1578e+06	1.06768e+07	7.61538e+06	8.03919e+06	1.05796e+07	4.20093e+06	16747.7	2.51457e+06	3.29651e+06	5.47554e+06	6.2592e+06	5.05065e+06	3.72559e+06
55	Ighv1-63	2	2	2	34.2	34.2	34.2	12.9	0	24.173	176690000	20	44172000	A0A075B5X2	A0A075B5X2		16747.7	16747.7	16747.7	16747.7	16747.7	16747.7	16747.7	16747.7	16747.7	16747.7	16747.7	16747.7	16747.7	16747.7	16747.7	16747.7	16747.7	16747.7	16747.7	985793	1.26064e+06	16747.7	16747.7	16747.7	16747.7	16747.7	16747.7	16747.7	16747.7	1.52503e+06	16747.7	1.06042e+06	16747.7
56	Ighv1-64	5	1	1	60.7	21.4	21.4	12.922	0	82.279	1378900000	60	344740000	A0A075B5X3	A0A075B5X3		3.21129e+06	16747.7	16747.7	3.69104e+06	16747.7	16747.7	3.63018e+06	16747.7	3.3567e+06	2.6531e+06	4.80938e+06	3.01157e+06	4.61075e+06	5.53897e+06	16747.7	1.87263e+06	3.34244e+06	16747.7	3.23004e+06	6.69275e+06	2.33485e+06	3.10546e+06	16747.7	3.98778e+06	1.70637e+06	2.75891e+06	16747.7	1.61509e+06	3.03984e+06	3.68327e+06	7.64988e+06	4.70045e+06	4.08657e+06
57	Ighv1-69	5	3	3	61.2	48.3	48.3	12.891	0	136.99	2226700000	63	556680000	A0A075B5X7;A0A0G2JFS5;A0A075B5W1	A0A075B5X7;A0A0G2JFS5		16747.7	16747.7	16747.7	16747.7	16747.7	16747.7	16747.7	16747.7	16747.7	1.38762e+06	16747.7	1.93443e+06	16747.7	16747.7	16747.7	16747.7	1.35088e+07	16747.7	16747.7	16747.7	16747.7	1.35686e+07	7.77303e+06	9.15081e+06	8.98643e+06	9.63807e+06	5.39578e+06	6.77202e+06	5.52544e+06	1.55121e+07	9.80939e+06	7.03591e+06	6.1578e+06
58	Ighv1-72;Ighv1-62-3	5	3	2	56.4	43.6	37.6	12.877	0	45.963	6662200000	245	1332400000	A0A075B5X9;P01754;P01751;P01753	A0A075B5X9;P01754;P01751;P01753	Ig heavy chain V region 1-62-3;Ig heavy chain V region B1-8/186-2;Ig heavy chain V region 186-1	2.54474e+07	9.00339e+06	1.88371e+06	1.99798e+07	1.10367e+07	1.12806e+07	1.92196e+07	2.17393e+07	1.74261e+07	2.39856e+07	1.49148e+07	2.24814e+07	1.98061e+07	2.15628e+07	9.48956e+06	9.69111e+06	2.75945e+07	9.57899e+06	9.06878e+06	2.77394e+07	1.87267e+07	2.35138e+07	1.93227e+07	2.53676e+07	9.15644e+06	1.62841e+07	1.8962e+07	1.4764e+07	3.09026e+07	1.88576e+07	3.85949e+07	2.24401e+07	1.83975e+07
59	Ighv1-74	4	2	2	40.5	21.6	21.6	12.9	0	45.447	2554700000	223	425790000	A0A075B5Y1;A0A0G2JGK2;P01750;P06328;A0A075B665;P01748;P06329;P03980	A0A075B5Y1;A0A0G2JGK2;P01750;P06328	Ig heavy chain V region 102;Ig heavy chain V region VH558 B4	2.52961e+06	2.75723e+06	1.03911e+07	4.61872e+06	663943	3.27478e+06	2.10371e+06	2.39467e+06	2.98487e+06	1.8059e+06	1.6364e+06	6.23225e+06	7.45804e+06	2.54248e+06	3.68837e+06	3.55268e+06	4.27234e+06	2.06305e+06	660101	5.95521e+06	9.64019e+06	3.66573e+06	2.63719e+06	8.2204e+06	8.59115e+06	8.57866e+06	9.7166e+06	2.623e+06	6.85394e+06	6.88637e+06	7.20049e+06	6.62766e+06	4.79291e+06
60	Ighv1-75	3	1	1	40.2	21.4	21.4	12.957	0	21.856	422290000	45	105570000	A0A075B5Y2	A0A075B5Y2		16747.7	16747.7	16747.7	16747.7	16747.7	16747.7	16747.7	16747.7	3.03911e+06	16747.7	16747.7	16747.7	2.38775e+06	2.58846e+06	16747.7	2.11342e+06	1.9554e+06	16747.7	16747.7	1.28597e+06	876266	2.17282e+06	1.46259e+06	593759	1.41219e+06	16747.7	16747.7	16747.7	16747.7	3.1609e+06	16747.7	1.7316e+06	1.45989e+06
61	Ighv1-80	2	1	1	39.3	12.8	12.8	12.763	0	8.0179	262850000	24	65712000	A0A075B5Y3	A0A075B5Y3		2.30176e+06	16747.7	16747.7	7.12693e+06	16747.7	16747.7	16747.7	16747.7	16747.7	3.83801e+06	2.49627e+06	16747.7	16747.7	3.73422e+06	16747.7	16747.7	16747.7	16747.7	16747.7	3.36674e+06	16747.7	887684	1.9935e+06	2.13883e+06	16747.7	16747.7	16747.7	16747.7	16747.7	16747.7	16747.7	2.54869e+06	1.12945e+06
62	Ighv1-81	6	5	3	59	59	32.5	12.989	0	103.52	4749700000	303	791610000	A0A075B5Y4	A0A075B5Y4		8.26075e+06	5.9591e+06	6.62961e+06	9232844	6.51576e+06	5.66733e+06	1.31445e+07	1.15137e+07	5.3301e+06	4.97378e+06	7.74015e+06	1.20758e+07	1.3951e+07	8.90463e+06	1.09722e+07	6.57371e+06	1.68976e+07	1.37015e+07	4.24115e+06	6.82788e+06	5.0597e+06	1.41173e+07	8.50751e+06	3.89958e+07	4.65337e+06	1.56064e+07	1.56466e+07	6.9197e+06	5.41462e+06	1.5214e+07	1.21374e+07	1.04567e+07	7.30652e+06
63	Ighv1-85	3	3	3	53	53	53	13.012	0	165.17	3227800000	169	1613900000	A0A075B5Y6;P06327	A0A075B5Y6		2.01552e+07	6.78069e+06	1.57998e+07	3.45476e+07	6.63484e+06	16747.7	3.64081e+07	2.60887e+07	9.63807e+06	1.39124e+07	1.22427e+07	6.05547e+07	5.59603e+07	8.59909e+07	5.67009e+06	1.47865e+07	2.39948e+07	1.21966e+07	2.36484e+07	3.63865e+07	15055239	2.86081e+07	1.57989e+07	2.5804e+07	1.80107e+07	3.10171e+07	3.21334e+06	6.63256e+06	8.44298e+06	2.04208e+07	7.33969e+06	1.60205e+07	1.00462e+07
64	Iglv1	3	3	2	41.9	41.9	34.2	12.312	0	179.78	14900000000	342	2976300000	A0A075B663;P01723;P01727	A0A075B663;P01723;P01727	Ig lambda-1 chain V region;Ig lambda-1 chain V region S43	5.37811e+07	1.66867e+07	5.76428e+06	2.33952e+07	1.24541e+07	1.31279e+07	7.82868e+07	5.99922e+07	3.34013e+07	4.53054e+07	4.87186e+07	6.72611e+07	6.394e+07	3.97723e+07	32044539	8.83273e+06	3.68447e+07	1.18934e+07	2.30944e+07	4.80869e+07	3.7066e+07	7.14075e+07	1.55059e+07	5.75464e+07	3.73173e+07	3.94719e+07	1.93675e+07	2.20941e+07	20377287	4.11553e+07	6.7713e+07	3.8551e+07	4.12043e+07
65	Iglv2	2	1	1	36.2	28.4	28.4	12.165	0	61.646	417340000	32	83469000	A0A075B664;P01728	A0A075B664;P01728	Ig lambda-2 chain V region	16747.7	16747.7	16747.7	16747.7	16747.7	16747.7	1.31807e+06	16747.7	16747.7	16747.7	16747.7	16747.7	16747.7	2.27377e+06	16747.7	16747.7	16747.7	16747.7	16747.7	16747.7	16747.7	16747.7	16747.7	16747.7	940655	1.86284e+06	1.55246e+06	1.15846e+06	1.35939e+06	16747.7	1.71267e+06	2.45184e+06	1.98289e+06
66	Igkv12-47	3	3	3	32.2	32.2	32.2	12.709	0	110.1	2864800000	171	477460000	A0A075B666	A0A075B666		1.47049e+07	16747.7	16747.7	1.11879e+07	3.94225e+06	3.41802e+06	7.10576e+06	6.26305e+06	5.55215e+06	6.57371e+06	16747.7	6.11671e+06	7.74363e+06	1.02463e+07	1.24387e+06	708298	1.14568e+07	2.11682e+06	6.45517e+06	1.74935e+07	3.318e+06	9.11645e+06	4.69147e+06	5.09484e+06	6.57371e+06	8.79367e+06	6.38599e+06	3.26423e+06	6.17788e+06	1.96161e+07	4.49018e+06	5.36182e+06	4.1573e+06
67	Ighv1-78	3	3	3	63.3	63.3	63.3	11.047	0	76.162	2281300000	157	456270000	A0A075B674;A0A0G2JGN3	A0A075B674;A0A0G2JGN3		9.61625e+06	1.42387e+06	3.16997e+06	5.6006e+06	2.59382e+06	2.2697e+06	991312	3.73151e+06	5.22472e+06	4.1296e+06	4.33588e+06	9.00339e+06	1.87369e+07	6.33986e+06	419868	858256	5.41669e+06	16747.7	16747.7	1.24003e+07	4.70933e+06	6.05625e+07	16747.7	6.04222e+06	3.20652e+06	2.48101e+06	2.85937e+06	2.08356e+06	4.59011e+06	1.03785e+07	8.16515e+06	8.49418e+06	4.31706e+06
68	Igkv4-53	3	3	3	63.9	63.9	63.9	10.366	0	108.52	1496700000	78	498890000	A0A075B677;A0A0G2JFC6	A0A075B677;A0A0G2JFC6		4.02423e+06	16747.7	6.39431e+06	1.70174e+07	2.24289e+06	8.16309e+06	16747.7	16747.7	16747.7	16747.7	16747.7	6.47318e+06	16747.7	6.95201e+06	16747.7	16747.7	2.94897e+06	16747.7	6.85394e+06	1.30825e+07	16747.7	1.04675e+07	16747.7	1.88087e+06	6.46695e+06	16747.7	4.3467e+06	4.59096e+06	16747.7	5.69349e+06	1.40703e+07	16747.7	2.06533e+07
69	Ighv1-62-2	6	6	6	67	67	67	11.224	0	75.29	1869300000	182	311560000	A0A075B680;A0A0G2JFL3;A0A0A6YXZ4	A0A075B680;A0A0G2JFL3;A0A0A6YXZ4		631961	16747.7	1.32848e+06	16747.7	16747.7	16747.7	1.19835e+06	850435	1.86284e+06	1.23641e+06	742525	1.53981e+06	16747.7	16747.7	16747.7	16747.7	2.89286e+06	1.77625e+06	16747.7	5.72072e+06	637839	5.11181e+06	1.86523e+06	2.22822e+06	1.98011e+06	16747.7	1.51399e+06	2.90583e+06	3.74805e+06	830792	6.63002e+06	2.14859e+06	6.8904e+06
70	Ighv2-9-1	3	3	2	36.2	36.2	27.6	12.481	0	10.474	956700000	89	318900000	A0A075B697;P01820;P01819;A0A075B5Q7;A0A0A6YWY9	A0A075B697;P01820;P01819	Ig heavy chain V region PJ14;Ig heavy chain V region MOPC 141	1.1519e+07	6.63531e+06	988089	16747.7	1.68878e+06	1.80884e+06	6.57371e+06	1.26766e+07	279960	2.84316e+06	2.66863e+07	1.23418e+07	3.44968e+06	2.701e+06	1.52748e+07	1.35806e+06	2.18275e+06	1.35583e+06	16747.7	1.12022e+06	1.74756e+06	2.65665e+06	2.08462e+06	16747.7	3.87499e+06	7.29837e+06	5.62208e+06	1.49748e+06	16747.7	3.80994e+06	2.41065e+06	1.06742e+07	5.57516e+06
71	Igha	25	25	25	98.8	98.8	98.8	36.718	0	323.31	228000000000	2359	16300000000	A0A075B6A3;A0A0A6YXW6;P01878	A0A075B6A3;A0A0A6YXW6;P01878	Ig alpha chain C region	3.24841e+08	1.94593e+08	2.96477e+08	3.79847e+08	1.56589e+08	2.04964e+08	2.62181e+08	2.61936e+08	2.19669e+08	2.22718e+08	1.8966e+08	2.40016e+08	2.97146e+08	225629372	1.99325e+08	2.02818e+08	3.43891e+08	2.89228e+08	1.48867e+08	1.52193e+08	2.30305e+08	2.6241e+08	1.71122e+08	2.27122e+08	3.39518e+08	1.57359e+08	2.40653e+08	2.37541e+08	3.51419e+08	1.63066e+08	9.51461e+08	3.16961e+08	6.47791e+08
72	Ighv2-6	2	1	1	22.4	13.8	13.8	12.595	0	18.776	103790000	21	34598000	A0A075B6A7	A0A075B6A7		16747.7	16747.7	16747.7	16747.7	16747.7	16747.7	16747.7	16747.7	16747.7	16747.7	16747.7	5.6725e+06	16747.7	16747.7	1.16388e+06	1.6716e+06	1.61362e+06	1.73079e+06	16747.7	16747.7	16747.7	818838	822724	16747.7	3.74028e+06	16747.7	16747.7	16747.7	16747.7	16747.7	1.64036e+06	16747.7	2.027e+06
73	Igkv19-93	2	2	2	23.7	23.7	23.7	12.734	0	26.347	4360000000	259	871400000	A0A075B6D5;A0A0G2JFZ3	A0A075B6D5;A0A0G2JFZ3		5.68892e+06	16747.7	2.15953e+06	8.24899e+06	5.70688e+06	5.90908e+06	1.07377e+07	7.32973e+06	4.89843e+06	7.77502e+06	2.31794e+06	1.29905e+07	8.58793e+06	9.2537e+06	3.81842e+06	7.4678e+06	2.13246e+07	6.7901e+06	881704	2.30284e+07	1.23561e+07	8.76405e+06	8.30445e+06	6.27986e+06	1.56177e+07	1.40404e+07	4.95671e+06	8.47533e+06	6.03362e+06	1.46348e+07	21613523	8.88505e+06	6.75535e+06
74	Ighv13-2	4	4	4	49	49	49	11.343	0	8.2997	42130000	12	7021700	A0A087WPN7;A0A0A6YWN3	A0A087WPN7;A0A0A6YWN3		357820	16747.7	16747.7	16747.7	16747.7	16747.7	16747.7	16747.7	16747.7	16747.7	16747.7	16747.7	16747.7	16747.7	16747.7	16747.7	16747.7	16747.7	16747.7	2.70065e+06	16747.7	16747.7	16747.7	16747.7	1.09415e+06	16747.7	16747.7	16747.7	16747.7	16747.7	16747.7	16747.7	16747.7
75	Fn1	133	133	133	66.4	66.4	66.4	250.29	0	323.31	223000000000	7564	2147900000	B9EHT6;A0A087WSN6;Q3UHL6;A0A087WR50;P11276;B7ZNJ1;A0A087WS56;Q4KL80;A0A087WS99;A0A087WQW8;A0A087WSU6;A0A087WQE0	B9EHT6;A0A087WSN6;Q3UHL6;A0A087WR50;P11276;B7ZNJ1;A0A087WS56	Fibronectin;Anastellin	2.8083e+07	3.24537e+07	2.9269e+07	2.82517e+07	2.46484e+07	2.47357e+07	2.53134e+07	2.05226e+07	2.02445e+07	3.34405e+07	2.52739e+07	3.21625e+07	3.35274e+07	2.37284e+07	2.61833e+07	3.95034e+07	2.21352e+07	1.85468e+07	2.12416e+07	2.21628e+07	2.65901e+07	2.22239e+07	3.43757e+07	3.18412e+07	2.02898e+07	1.74261e+07	1.46956e+07	1.79386e+07	1.6301e+07	2.15697e+07	1.73219e+07	2.04147e+07	2.71883e+07
76	Actr5	3	3	3	5.8	5.8	5.8	68.158	0.0056818	2.8636	11600000000	18	447510000	A0A0A0MQ89;Q80US4;V9GXE4	A0A0A0MQ89;Q80US4;V9GXE4	Actin-related protein 5	16747.7	6.09783e+06	16747.7	16747.7	16747.7	16747.7	16747.7	16747.7	1.33911e+08	16747.7	16747.7	16747.7	16747.7	16747.7	1.88664e+08	16747.7	16747.7	16747.7	16747.7	16747.7	16747.7	16747.7	16747.7	16747.7	16747.7	16747.7	16747.7	16747.7	16747.7	16747.7	16747.7	16747.7	1.59354e+08
77	Serpina1a	36	17	5	62.8	48.4	21.8	48.795	0	323.31	959000000000	4795	53300000000	A0A0A0MQA3;P07758	A0A0A0MQA3;P07758	Alpha-1-antitrypsin 1-1	6.50878e+08	5.50957e+08	7.33676e+08	6.30614e+08	482996074	4.35178e+08	6.49339e+08	5.07475e+08	7.50314e+08	6.40939e+08	8.67473e+08	7.44369e+08	7.54944e+08	6.58436e+08	5.8047e+08	5.97827e+08	5.25814e+08	5.95752e+08	5.90774e+08	7.89493e+08	6.79346e+08	6.08792e+08	8.50011e+08	7.71347e+08	7.09115e+08	7.50314e+08	7.56441e+08	7.07616e+08	6.91597e+08	810092933	826923990	8.54463e+08	8.02758e+08
78	Ighv3-5	1	1	1	13.1	13.1	13.1	11.277	0.0023148	6.6895	59150000	10	14787000	A0A0A0MQC1	A0A0A0MQC1		16747.7	16747.7	16747.7	16747.7	16747.7	16747.7	16747.7	16747.7	16747.7	16747.7	16747.7	16747.7	16747.7	16747.7	16747.7	16747.7	16747.7	16747.7	16747.7	16747.7	16747.7	16747.7	16747.7	16747.7	16747.7	16747.7	16747.7	16747.7	16747.7	16747.7	16747.7	16747.7	16747.7
79	GAPDH;Gm7293;Gapdh;Gm3839	4	4	4	20.1	20.1	20.1	35.81	0	19.605	82949000	29	5184300	D2KHZ9;D3YYI5;A0A0A0MQF6;P16858;S4R257;S4R1W1;V9GXA7;V9GX06	D2KHZ9;D3YYI5;A0A0A0MQF6;P16858;S4R257;S4R1W1	Glyceraldehyde-3-phosphate dehydrogenase	210937	96317.8	16747.7	262708	16747.7	259211	16747.7	77282.4	16747.7	116550	249367	16747.7	223026	16747.7	16747.7	136680	16747.7	16747.7	16747.7	16747.7	16747.7	16747.7	16747.7	16747.7	265308	16747.7	16747.7	16747.7	16747.7	16747.7	16747.7	16747.7	16747.7
80	Gpx1	2	2	2	20.1	20.1	20.1	16.353	0.0020921	4.2853	20725000	6	2072500	A0A0A6YY34;A0A0A6YVV2;P11352	A0A0A6YY34;A0A0A6YVV2;P11352	Glutathione peroxidase;Glutathione peroxidase 1	16747.7	16747.7	16747.7	16747.7	16747.7	16747.7	16747.7	16747.7	16747.7	628147	16747.7	16747.7	476930	286734	16747.7	16747.7	16747.7	16747.7	16747.7	450060	202721	16747.7	16747.7	16747.7	379467	16747.7	16747.7	16747.7	16747.7	16747.7	16747.7	16747.7	16747.7
81	Ighv1-15	7	6	5	69.2	69.2	57.3	12.953	0	323.31	18200000000	488	3034300000	A0A0A6YXA5	A0A0A6YXA5		4.40922e+07	1.35186e+06	5.65536e+06	3.63754e+07	16747.7	1.63943e+07	3.4646e+07	6.33015e+07	7.12117e+07	4.79526e+07	1.46348e+07	4.85359e+07	6.75312e+07	9.57313e+07	9.71375e+06	2.60851e+06	6.86275e+07	1.15176e+06	2.2623e+07	1.31526e+08	6.40203e+06	6.20723e+07	8.66291e+07	6.58369e+07	2.84407e+07	5.52617e+07	1.74539e+07	1.50767e+07	2.5848e+07	1.8966e+08	5.03536e+07	4.41907e+07	9.64019e+06
82	Ighv1-18	7	3	3	58.1	41.9	41.9	12.912	0	61.654	5821400000	254	1164300000	A0A0A6YXN4;A0A075B5U4	A0A0A6YXN4;A0A075B5U4		1.72528e+07	7.2505e+06	9.34231e+06	2.04053e+07	7.74067e+06	9.88904e+06	2.15766e+07	1.45022e+07	9.39801e+06	2.90703e+07	1.01882e+07	2.43022e+07	2.05441e+07	1.55508e+07	1.22131e+07	5.31613e+06	2.01488e+07	1.02565e+06	6.57371e+06	1.57625e+07	1.83975e+07	1.99047e+07	6.52165e+06	2.05348e+07	1.98633e+07	1.00777e+07	1.18276e+07	5.98386e+06	1.67294e+07	1.35057e+07	2.29337e+07	1.57264e+07	1.62816e+07
83	Ighv8-8	5	5	5	43.7	43.7	43.7	13.185	0	258.23	5569900000	332	1392500000	A0A0A6YXQ0	A0A0A6YXQ0		1.61899e+07	1.55596e+07	1.42641e+07	1.84399e+07	1.81247e+07	1.90724e+07	6.09244e+06	1.74676e+07	9.00339e+06	1.61305e+07	1.40861e+07	2.05405e+07	3.12966e+07	1.43824e+07	5.59712e+07	1.92e+07	2.99063e+07	4.01674e+06	1.71581e+06	1.82287e+07	7.6023e+06	1.81305e+07	2.35004e+07	2.25262e+07	3.63975e+07	2.66023e+07	1.85901e+07	9.50505e+06	1.56023e+07	2.28191e+07	4.72895e+07	1.7768e+07	1.04303e+07
84	Ncam1	11	11	11	20.4	20.4	20.4	80.357	0	33.019	374630000	68	12085000	E9Q589;A0A0A6YY47;P13595;A0A0A6YWU2;E9QB01;A0A0A6YY91	E9Q589;A0A0A6YY47;P13595;A0A0A6YWU2;E9QB01;A0A0A6YY91	Neural cell adhesion molecule 1	61333.1	222349	192708	210966	16747.7	16747.7	16747.7	16747.7	160883	402282	320797	550570	1.09336e+06	16747.7	174578	195825	16747.7	16747.7	16747.7	129291	75649.9	16747.7	16747.7	434286	297467	16747.7	167633	29204.8	16747.7	94806.9	155082	16747.7	171735
85	Ighg2c	10	8	8	43.9	38.2	38.2	36.407	0	232.27	4441800000	299	444180000	A0A0A6YY53;F6TQW2;P01864	A0A0A6YY53;F6TQW2;P01864	Ig gamma-2A chain C region secreted form	4.96834e+06	16747.7	4.8288e+06	3.40862e+06	995096	2.62673e+06	2.54667e+06	3.0181e+06	3.79622e+06	2.75346e+06	1.81548e+06	1.07741e+06	994599	6.81645e+06	2.47009e+06	992503	16747.7	1.6899e+06	935921	2.53595e+06	8.66405e+06	1.91535e+06	2.69649e+06	1.38319e+06	4.03227e+06	6.04755e+06	1.08067e+07	1.90886e+07	2.46794e+06	1.05828e+07	5.32216e+06	3.84078e+06	5.79027e+06
86	Ighv8-5;Ighv8-14;Ighv8-9;Ighv8-13;Ighv8-11	4	4	4	30.3	30.3	30.3	13.172	0	12.552	240740000	29	48149000	A0A0A6YY60;A0A075B678;A0A075B5X1;A0A075B5Y0;A0A0G2JET1;A0A075B5X4;A0A075B5W4;A0A0A6YXA3	A0A0A6YY60;A0A075B678;A0A075B5X1;A0A075B5Y0;A0A0G2JET1;A0A075B5X4		1.00913e+06	16747.7	16747.7	16747.7	16747.7	16747.7	16747.7	16747.7	16747.7	16747.7	3.4856e+06	818954	16747.7	16747.7	16747.7	16747.7	16747.7	16747.7	16747.7	16747.7	2.56229e+06	16747.7	1.2474e+07	16747.7	16747.7	16747.7	661286	16747.7	16747.7	16747.7	3.83897e+06	16747.7	656543
87	Igkv4-57	4	4	2	61.5	61.5	34.2	12.689	0	107.26	3899300000	256	649880000	A0A0A6YYE7;A0A0A6YYE5;A0A075B5L8	A0A0A6YYE7		3.04303e+06	3.76414e+06	2.7862e+06	1.1933e+07	2.19904e+06	6.04414e+06	7.52604e+06	6.39564e+06	6.99795e+06	1.03356e+07	9.37703e+06	1.26651e+07	1.0241e+07	1.82114e+07	4.60137e+06	1.92226e+06	2.63364e+06	826836	1.01825e+07	1.06411e+07	7.30652e+06	1.22928e+06	5.89744e+06	1.0141e+07	8.01102e+06	8.37496e+06	8.65731e+06	1.28645e+07	5.65128e+06	9.37703e+06	1.84209e+07	1.09019e+07	8.481e+06
88	Igkv2-137	4	4	4	29.2	29.2	29.2	13.131	0	23.87	506700000	63	101340000	A0A0B4J1H6;P01630	A0A0B4J1H6;P01630	Ig kappa chain V-II region 7S34.1	1.37085e+06	16747.7	743028	1.49471e+06	1.22613e+06	1.17845e+06	1.73641e+06	2.75346e+06	1.74334e+06	1.91905e+06	1.3251e+06	1.61126e+06	16747.7	1.18626e+06	675448	16747.7	2.26133e+06	16747.7	1.59548e+06	16747.7	1.82239e+06	1.6264e+06	1.95239e+06	2.00475e+06	2.51636e+06	1.13957e+06	16747.7	1.10421e+06	1.9769e+06	16747.7	2.23505e+06	1.27712e+06	16747.7
89	Igkv1-135;Igkv1-133	9	9	9	45.8	45.8	45.8	13.305	0	173.95	5549300000	382	693660000	A0A0B4J1H7;A0A0B4J1H8	A0A0B4J1H7;A0A0B4J1H8		6.40327e+06	3.69104e+06	4.4987e+06	9.0488e+06	4.62826e+06	4.8903e+06	5.42218e+06	9.12431e+06	7.45418e+06	5.76874e+06	8.83342e+06	1.35647e+07	6.57371e+06	1.26433e+07	9.91879e+06	4.88206e+06	6.57371e+06	5.93224e+06	3.03984e+06	9.19418e+06	1.06431e+07	6.62511e+06	4.21308e+06	1.50719e+07	5.10239e+06	7.79e+06	6.91723e+06	3.32929e+06	3.15798e+06	2.42889e+07	5.53265e+06	6.27075e+06	3.85385e+06
90	Igkv16-104	2	2	2	23.3	23.3	23.3	12.874	0	16.787	550720000	71	275360000	A0A0B4J1I1	A0A0B4J1I1		16747.7	16747.7	5.11939e+06	16747.7	4.90709e+06	3.85693e+06	6.33551e+06	5.76874e+06	1.62701e+06	5.9953e+06	4.03583e+06	7.47574e+06	2.06084e+06	1.49592e+07	16747.7	2.71437e+07	1.07694e+07	3.14062e+06	1.67735e+06	1.1578e+07	2.7261e+06	3.27791e+06	16747.7	2.93164e+06	16747.7	4.12045e+06	16747.7	16747.7	1.67735e+06	3.00538e+06	2.04571e+06	16747.7	16747.7
91	Igkv4-74	3	2	2	63.9	50.4	50.4	12.891	0	93.699	274170000	33	68543000	A0A0B4J1I3	A0A0B4J1I3		16747.7	16747.7	16747.7	16747.7	911231	16747.7	4.0556e+06	16747.7	16747.7	16747.7	16747.7	16747.7	16747.7	3.27478e+06	16747.7	16747.7	16747.7	16747.7	16747.7	16747.7	16747.7	1.10806e+06	16747.7	16747.7	1.19782e+06	16747.7	1.63342e+06	16747.7	16747.7	16747.7	9.58857e+06	16747.7	16747.7
92	Igkv4-70	5	5	2	62.1	62.1	48.3	12.625	0	46.794	3041900000	101	506990000	A0A0B4J1I5	A0A0B4J1I5		6.75418e+06	2.63838e+06	3.0595e+06	5.2816e+06	16747.7	16747.7	3.49841e+06	5.12811e+06	5.78747e+06	2.10494e+07	5.07748e+06	16747.7	1.58705e+06	5.75187e+06	5.3486e+06	3.26048e+06	9.33037e+06	1.51801e+06	16747.7	3.51111e+06	7.75596e+06	7.01466e+06	4.53174e+06	337646	1.50108e+07	5.78747e+06	5.73628e+06	8.67392e+06	4.50711e+06	7.43791e+06	7.98354e+06	9.66442e+06	1.15592e+07
93	Igkv4-68	1	1	1	17.1	17.1	17.1	12.752	0	12.124	471380000	36	117850000	A0A0B4J1I7	A0A0B4J1I7		1.10711e+07	16747.7	1.17545e+06	2.09517e+06	16747.7	16747.7	3.06472e+06	16747.7	1.21943e+06	5.45872e+06	16747.7	16747.7	16747.7	16747.7	16747.7	2.83348e+06	5.21785e+06	16747.7	16747.7	16747.7	1.60302e+06	16747.7	2.95493e+06	16747.7	4.82298e+06	16747.7	1.74842e+06	3.12917e+06	2.63442e+06	16747.7	3.04462e+06	16747.7	3.78807e+06
94	Igkv4-59	4	1	0	30.8	17.1	0	12.67	0	64.899	1704100000	72	340810000	A0A0B4J1I8;P04944;P04941;P04940;P04943;P04942;A0A0B4J1I6;A0A0G2JEH0	A0A0B4J1I8;P04944;P04941;P04940;P04943;P04942	Ig kappa chain V-VI region NQ5-78.2.6;Ig kappa chain V-VI region NQ2-48.2.2;Ig kappa chain V-VI region NQ2-17.4.1;Ig kappa chain V-VI region NQ6-8.3.1;Ig kappa chain V-VI region NQ5-61.1.2	2.68839e+06	1.15524e+06	3.78446e+06	2.98618e+06	1.48659e+06	1.84713e+06	6.21737e+06	3.31225e+06	1.78519e+06	1.01521e+07	3.1609e+06	7.33551e+06	16747.7	4.69822e+06	3.55052e+06	2.35294e+06	4.43345e+06	16747.7	16747.7	2.75006e+06	3.65696e+06	3.53671e+06	5.56349e+06	16747.7	8.79092e+06	4.80857e+06	4.77631e+06	4.00871e+06	3.09973e+06	4.89109e+06	2.99231e+06	1.00696e+07	8.66405e+06
95	Igkv4-55	3	2	1	49.6	35.9	13.7	12.736	0	27.173	1713600000	136	285600000	A0A0B4J1I9;P04945;A0A0G2JDW9	A0A0B4J1I9;P04945	Ig kappa chain V-VI region NQ2-6.1	3.27155e+06	439169	1.46818e+06	2.00149e+06	1.99144e+06	16747.7	1.81166e+06	877902	5.10971e+06	6.9425e+06	3.057e+06	7.7666e+06	1.04096e+06	2.23962e+06	289887	16747.7	719755	295241	2.3687e+06	4.23772e+06	1.07506e+06	1.26035e+06	2.18122e+06	7.57706e+06	6.086e+06	4.37288e+06	2.7047e+06	2.96478e+06	1.10718e+06	5.07748e+06	1.34443e+07	4.95286e+06	4.54964e+06
96	Igkv5-43	2	1	1	23.5	13	13	12.6	0	128.15	3280400000	139	820110000	A0A0B4J1J2	A0A0B4J1J2		3.85372e+07	16747.7	16747.7	8.05363e+06	3.62845e+06	1.20901e+07	1.64246e+07	1.10478e+07	3.96341e+06	8.645e+06	1.29105e+07	9.75493e+06	5.78486e+06	7.50662e+06	7.62204e+06	16747.7	9.75948e+06	3.75905e+06	2.18241e+06	2.01356e+07	7.45007e+06	8.57508e+06	970972	1.56574e+07	1.12719e+07	1.07377e+07	8.23625e+06	1.21556e+07	16747.7	7.29795e+06	1.7663e+07	2.7585e+06	1.13298e+07
97	Ighv9-3	5	5	3	57.3	57.3	30.8	12.996	0	323.31	1921400000	81	480340000	A0A0B4J1J5	A0A0B4J1J5		3.39825e+06	16747.7	16747.7	16747.7	16747.7	16747.7	4.28353e+06	16747.7	3.65397e+06	3.65098e+06	16747.7	1.15837e+07	2.34837e+06	16747.7	16747.7	16747.7	4.74676e+06	16747.7	16747.7	792797	16747.7	9.71119e+06	3.70165e+06	16747.7	3.67252e+06	1.05006e+07	2.75526e+06	3.76883e+06	2.3687e+06	7.9057e+06	4.82032e+06	934832	849610
98	Ighv10-1	9	9	6	62.2	62.2	42.9	13.549	0	103	1312700000	136	218780000	A0A0B4J1J6	A0A0B4J1J6		1.16587e+06	16747.7	16747.7	16747.7	16747.7	16747.7	1.63055e+06	16747.7	764776	2.12784e+06	1.13087e+06	2.2303e+06	4.68574e+06	16747.7	16747.7	250477	16747.7	16747.7	16747.7	16747.7	16747.7	455220	1.91009e+06	1.4893e+06	16747.7	570071	3.1442e+06	628667	1.71581e+06	3.96473e+06	5.65011e+06	3.44316e+06	2.42105e+06
99	Ighv1-82	4	2	2	67.3	28.6	28.6	10.65	0	20.949	1286600000	109	214430000	A0A0B4J1J7;A0A0G2JEU7	A0A0B4J1J7;A0A0G2JEU7		7.02965e+06	1.75264e+06	6.14038e+06	6.97513e+06	16747.7	16747.7	780232	2.12784e+06	889851	1.06363e+06	1.10448e+06	2.19105e+06	1.38489e+06	1.49847e+06	881851	490937	4.18889e+06	406432	484006	2.17966e+06	529437	838429	575253	834655	3.60513e+06	2.98487e+06	3.85e+06	2.56621e+06	484006	6.52295e+06	2.93958e+06	6.89245e+06	3.08675e+06
100	Iglv3	4	4	4	45.9	45.9	45.9	13.416	0	8.571	356630000	65	89158000	A0A0B4J1K5	A0A0B4J1K5		1.08972e+06	16747.7	835139	1.2864e+06	16747.7	16747.7	1.70116e+06	1.82184e+06	16747.7	16747.7	16747.7	2.47467e+06	4.32003e+06	16747.7	16747.7	16747.7	16747.7	1.43307e+06	16747.7	16747.7	16747.7	16747.7	4.6101e+06	6.52357e+06	16747.7	16747.7	16747.7	16747.7	702059	3.057e+06	2.50661e+06	16747.7	16747.7
101	Ighv1-77	5	5	3	86.7	86.7	39.8	10.662	0	68.807	2962400000	134	493740000	A0A0B4J1M0;A0A0G2JGS9	A0A0B4J1M0;A0A0G2JGS9		3.67019e+06	16747.7	4.33133e+06	3.48378e+06	16747.7	16747.7	6.68969e+06	4.58338e+06	1.23418e+07	7.21223e+06	2.84428e+06	5.37152e+06	5.2957e+06	5.14456e+06	3.61912e+06	3.62676e+06	6.82286e+06	3.83262e+06	3.52427e+06	7.12031e+06	4.87615e+06	7.87094e+06	2.35047e+06	2.52558e+06	2.77371e+06	2.28475e+06	16747.7	7.6978e+06	1.03978e+07	4.49643e+06	5.87719e+06	663420	16747.7
102	Ighv1-76	4	3	3	55.1	39.8	39.8	10.879	0	147.3	3082800000	262	513800000	A0A0B4J1N0;A0A0G2JFE9	A0A0B4J1N0;A0A0G2JFE9		1.69127e+06	399555	1.97155e+06	1.1185e+06	521926	1.52691e+06	6.82123e+06	2.17807e+06	16747.7	1.87586e+06	16747.7	863583	2.42791e+06	2.83955e+06	1.77751e+06	1.04804e+06	1.75439e+07	3.68179e+06	7.17036e+06	2.26061e+07	4.08657e+06	1.8788e+07	3.42696e+06	2.30201e+06	1.03716e+07	7.15513e+06	8.46126e+06	3.83702e+06	9.7448e+06	7.74015e+06	1.55753e+07	4.30747e+06	1.47675e+07
103	Ighv8-12	4	4	4	38.7	38.7	38.7	13.263	0	135.26	8630000000	371	2875300000	A0A0G2JDE1;A0A075B5X8	A0A0G2JDE1;A0A075B5X8		3.39681e+07	1.08101e+07	2.58013e+07	1.00227e+08	2.56966e+07	2.41609e+07	1.54727e+07	3.08057e+07	2.15049e+07	2.68287e+07	8.45993e+07	1.74514e+08	3.43888e+07	1.68722e+07	1.72865e+07	3.43602e+07	1.43497e+07	1.50182e+07	8.20727e+06	6.84043e+07	2.06533e+07	4.70569e+07	3.00098e+07	7.88935e+06	3.55059e+07	4.45032e+07	2.55099e+07	3.26527e+07	1.11199e+08	4.46807e+07	5.18687e+07	7.02519e+07	5.64205e+07
104	Antxr2	2	2	2	5.7	5.7	5.7	53.184	0	8.8928	136070000	49	5916200	Q3TCL6;A0A0G2JE26;Q6DFX2	Q3TCL6;A0A0G2JE26;Q6DFX2	Anthrax toxin receptor 2	89445.8	125043	154236	192118	57671.7	88254.3	100767	16747.7	100279	73375.9	16747.7	110047	127095	105648	135066	88625.5	127554	84840	65564.7	16747.7	16747.7	98894	101660	153403	157897	121459	106256	106785	101868	113222	47584.8	133932	89754
105	A0A0G2JE99;P01843	8	8	8	84.9	84.9	84.9	11.575	0	323.31	20100000000	539	4029400000	A0A0G2JE99;P01843	A0A0G2JE99;P01843	Ig lambda-1 chain C region	4.6704e+07	4.44933e+06	8.96853e+06	1.04804e+07	1.03034e+07	1.34514e+07	9.26368e+07	6.15179e+07	4.18725e+07	2.74011e+07	1.5214e+07	4.23379e+07	1.00696e+08	2.52343e+07	5.42348e+07	7.98405e+06	5.60355e+07	1.6506e+07	4.32889e+07	5.93481e+07	5.46025e+07	8.54605e+07	4.62022e+07	6.79659e+07	1.01018e+08	9.12689e+07	2.59964e+07	22569249	42004863	7.46647e+07	8.78491e+07	7.69805e+07	9.54231e+07
106	A0A0G2JFN8	3	1	1	29.8	12.4	12.4	13.316	0	11.106	277530000	45	69382000	A0A0G2JFN8	A0A0G2JFN8		16747.7	16747.7	16747.7	16747.7	16747.7	16747.7	1.84648e+06	1.40662e+06	1.19368e+06	2.41683e+06	953804	4.13975e+06	16747.7	3.21566e+06	16747.7	16747.7	1.36426e+06	16747.7	1.10718e+06	3.01157e+06	715278	4.22411e+06	1.15232e+06	4.66132e+06	16747.7	16747.7	16747.7	16747.7	905963	2.44925e+06	16747.7	16747.7	16747.7
107	Iglc3	9	9	4	96.2	96.2	52.4	11.371	0	195.29	3219600000	231	536610000	A0A0G2JGQ8;P01845	A0A0G2JGQ8;P01845	Ig lambda-3 chain C region	8.46799e+06	2.02233e+06	2.01555e+06	6.32633e+06	8.33159e+06	1.03125e+07	3.01157e+06	5.01609e+06	914414	4.06155e+06	2.90121e+07	3.6005e+06	5.58387e+06	3.15219e+06	2.37893e+06	1.83247e+06	8.57618e+06	7.80971e+06	2.86148e+06	5.83196e+06	1.26984e+07	7.15431e+06	1.02865e+07	1.39751e+07	2.2119e+06	1.95618e+06	4.60037e+06	16747.7	6.70473e+06	8.83342e+06	1.13543e+07	9.44166e+06	9.04731e+06
108	A0A0J9YVE6	39	39	8	44.1	44.1	8.1	137.7	0	273.28	10300000000	911	148620000	A0A0J9YVE6	A0A0J9YVE6		1.58223e+06	2.36917e+06	2.42472e+06	1.68177e+06	337682	576906	2.90808e+06	1.67124e+06	1.70419e+06	2.17436e+06	1.88994e+06	1.89214e+06	3.0475e+06	1.33201e+06	1.97731e+06	1.1929e+06	1.83313e+06	1.09089e+06	1.39215e+06	1.22123e+06	2.027e+06	1.87209e+06	1.82947e+06	1.96411e+06	1.6357e+06	995426	1.26127e+06	2.18734e+06	1.07639e+06	662211	921968	1.37221e+06	1.10262e+06
109	Hist1h2ah;Hist1h2aa;Hist1h2ad;Hist3h2a;H2afj;Hist1h2ak;Hist1h2af;Hist1h2ab;Hist1h2al;Hist2h2ac;Hist2h2aa1	3	3	3	29.4	29.4	29.4	13.66	0.0021368	4.7771	39783000	13	7956600	A0A0N4SV66;A3KPD0;Q8CGP4;B2RVF0;A2AB79;Q8CGP6;Q8R1M2;Q8CGP7;Q8CGP5;Q8BFU2;P22752;F8WIX8;Q149V4;B2RWH3;Q64523;Q6GSS7;Q8R029;B2RVP5;Q3THW5;P0C0S6;P27661	A0A0N4SV66;A3KPD0;Q8CGP4;B2RVF0;A2AB79;Q8CGP6;Q8R1M2;Q8CGP7;Q8CGP5;Q8BFU2;P22752;F8WIX8;Q149V4;B2RWH3;Q64523;Q6GSS7	Histone H2A;Histone H2A type 1-H;Histone H2A.J;Histone H2A type 1-K;Histone H2A type 1-F;Histone H2A type 3;Histone H2A type 1;Histone H2A type 2-C;Histone H2A type 2-A	16747.7	16747.7	16747.7	16747.7	16747.7	16747.7	16747.7	16747.7	16747.7	16747.7	16747.7	16747.7	16747.7	16747.7	16747.7	16747.7	16747.7	376565	16747.7	3.06613e+06	513128	1.99438e+06	16747.7	557946	684376	16747.7	16747.7	16747.7	16747.7	16747.7	16747.7	16747.7	16747.7
110	C1s2;C1sb	17	2	2	27.3	7	7	76.699	0	38.162	2173100000	96	83581000	W4VSN5;A0A0N4SVB3;Q8CFG8	W4VSN5;A0A0N4SVB3;Q8CFG8	Complement C1s-B subcomponent;Complement C1s-B subcomponent heavy chain;Complement C1s-B subcomponent light chain	251145	896841	527121	558808	16747.7	16747.7	1.34849e+06	16747.7	313364	193302	4.59503e+07	266660	505428	297240	248109	16747.7	402878	16747.7	16747.7	249076	16747.7	16747.7	16747.7	479520	16747.7	813204	680004	184807	448758	1.0223e+06	131370	16747.7	347943
111	Mmrn1	14	14	14	16.3	16.3	16.3	135.88	0	23.4	197570000	69	2905500	A0A0N4SVL8;G3UVV6;B2RPV6	A0A0N4SVL8;G3UVV6;B2RPV6	Multimerin-1	28249.2	16747.7	28706.3	28672.3	89541.7	16747.7	68203.1	16747.7	16747.7	16747.7	28186.9	16747.7	16747.7	28095	16747.7	16747.7	16747.7	16747.7	16747.7	16747.7	16747.7	27945.2	16747.7	16747.7	38427.7	16747.7	16747.7	16747.7	49132.6	16747.7	16747.7	16747.7	46660.7
112	Tgfbi	9	9	9	16	16	16	74.596	0	17.894	139000000	73	4343700	A1L353;P82198	A1L353;P82198	Transforming growth factor-beta-induced protein ig-h3	16747.7	57897.8	16747.7	136776	16747.7	72424.6	178783	16747.7	16747.7	141846	46403.4	66396	65769	60788.7	115557	65083.4	61667.6	92082.7	49132.6	102306	68331.7	173510	181335	67377.6	61893.9	72117.6	16747.7	16747.7	57559.8	61113.4	146314	54116.9	16747.7
113	H6pd	4	4	4	12.2	12.2	12.2	89.909	0	17.831	68707000	21	1808100	A2A7A7;Q8CFX1;A2A7A8	A2A7A7;Q8CFX1	GDH/6PGL endoplasmic bifunctional protein;Glucose 1-dehydrogenase;6-phosphogluconolactonase	16747.7	16747.7	16747.7	16747.7	16747.7	16747.7	16747.7	16747.7	16747.7	16747.7	16747.7	16747.7	16747.7	16747.7	16747.7	16747.7	16747.7	16747.7	16747.7	16747.7	16747.7	16747.7	16747.7	16747.7	16747.7	16747.7	16747.7	16747.7	16747.7	75023.8	16747.7	16747.7	16747.7
114	Cfp	16	16	16	34.7	34.7	34.7	50.327	0	210.24	15200000000	949	844910000	A2AE15;P11680	A2AE15;P11680	Properdin	1.35766e+07	8.78521e+06	1.40107e+07	9.66442e+06	2.0637e+07	1.94872e+07	1.032e+07	9.96735e+06	8.57866e+06	1.07377e+07	1.08008e+07	8.82222e+06	1.33704e+07	1.11005e+07	1.41043e+07	9.03565e+06	9.95938e+06	1.13183e+07	7.31763e+06	3.64604e+06	7.17473e+06	1.49345e+07	1.07058e+07	1.33728e+07	9.35012e+06	6.4584e+06	1.03488e+07	1.06014e+07	1.19544e+07	9.5926e+06	6.39296e+06	1.15999e+07	1.2075e+07
115	Gm5938	6	3	3	49.7	33.7	33.7	18.508	0	14.271	566370000	72	62930000	A2AEN9	A2AEN9		557272	16747.7	16747.7	16747.7	503672	775317	16747.7	16747.7	16747.7	3.38964e+06	1.15433e+06	16747.7	7.19819e+06	2.79169e+06	1.31156e+06	2.78003e+06	1.43032e+06	392419	16747.7	16747.7	973861	16747.7	16747.7	16747.7	16747.7	464248	874643	609604	964306	427989	16747.7	1.51358e+06	760452
116	Mup4	4	3	3	29.8	24.2	24.2	20.541	0	9.7941	61247000	16	5104000	A2ANT5;P11590	A2ANT5;P11590	Major urinary protein 4	16747.7	456308	16747.7	16747.7	16747.7	16747.7	16747.7	16747.7	16747.7	740802	16747.7	16747.7	751598	617603	16747.7	626032	16747.7	16747.7	16747.7	16747.7	16747.7	16747.7	16747.7	16747.7	16747.7	107067	175769	16747.7	16747.7	16747.7	16747.7	296475	294274
117	Mdn1	2	2	2	0.3	0.3	0.3	629.58	0.0057143	2.9227	3331300000	29	11689000	J3QMC5;A2ANY6	J3QMC5;A2ANY6		16747.7	16747.7	16747.7	16747.7	16747.7	16747.7	1.44952e+06	16747.7	16747.7	16747.7	16747.7	16747.7	16747.7	16747.7	1.27741e+06	16747.7	16747.7	16747.7	16747.7	16747.7	16747.7	16747.7	16747.7	16747.7	76129.3	16747.7	388119	16747.7	619979	16747.7	16747.7	16747.7	16747.7
118	Cd44	2	2	2	5.8	5.8	5.8	40.263	0.0022075	5.3097	314170000	37	24167000	Q3U8S1;A2APM5;A2APM3;A2APM4;E9QKM8;Q80X37;A2APM1;A2APM2;P15379	Q3U8S1;A2APM5;A2APM3;A2APM4;E9QKM8;Q80X37;A2APM1;A2APM2;P15379	CD44 antigen	16747.7	16747.7	16747.7	16747.7	2.94862e+06	2.51668e+06	16747.7	1.08333e+06	16747.7	318733	1.04967e+06	1.81983e+06	389514	306791	1.73803e+06	885831	955621	673342	852739	16747.7	2.16642e+06	710136	556573	16747.7	1.52245e+06	16747.7	254444	16747.7	16747.7	320797	16747.7	16747.7	16747.7
119	Cst3	1	1	1	16.7	16.7	16.7	11.141	0.0057915	3.0106	69098000	3	11516000	A2APX3;P21460	A2APX3;P21460	Cystatin-C	1.21523e+06	1.54675e+06	1.39048e+06	16747.7	2.28381e+06	2.74616e+06	16747.7	16747.7	16747.7	16747.7	16747.7	16747.7	16747.7	16747.7	16747.7	16747.7	1.26885e+06	16747.7	16747.7	16747.7	16747.7	16747.7	16747.7	1.29278e+06	16747.7	16747.7	16747.7	16747.7	16747.7	16747.7	16747.7	16747.7	16747.7
120	Tfpi	4	4	4	21.3	21.3	21.3	26.835	0	51.784	995640000	94	76588000	Q8BSB7;A2ARA4;A2ARA3;A2ARA0;O54819	Q8BSB7;A2ARA4;A2ARA3;A2ARA0;O54819	Tissue factor pathway inhibitor	2.41346e+06	3.53881e+06	2.52242e+06	2.04839e+06	3.06374e+06	3.20827e+06	2.40671e+06	2.22372e+06	2.48101e+06	611686	2.3634e+06	2.51978e+06	3.37971e+06	1.74577e+06	2.73351e+06	16747.7	1.13545e+06	16747.7	779336	16747.7	16747.7	16747.7	1.42222e+06	905322	1.3188e+06	590221	622406	734738	16747.7	1.17898e+06	627646	960742	1.89989e+06
121	AI182371	2	2	2	6.5	6.5	6.5	40.431	0.0022573	5.7078	45668000	11	2686400	A2AS37	A2AS37		16747.7	16747.7	16747.7	16747.7	190265	382384	16747.7	16747.7	16747.7	16747.7	16747.7	16747.7	16747.7	16747.7	16747.7	16747.7	16747.7	16747.7	16747.7	16747.7	16747.7	16747.7	16747.7	16747.7	16747.7	16747.7	16747.7	16747.7	16747.7	16747.7	16747.7	16747.7	16747.7
122	Ttn	7	7	7	0.2	0.2	0.2	3716	0.0023256	6.9161	6257900000	221	3463200	E9Q8N1;E9Q8K5;A2ASS6;F7CR78;F6RSJ3;A2AT70	E9Q8N1;E9Q8K5;A2ASS6	Titin	53745.1	29669.6	47447.9	69797.9	16747.7	29317.6	28280.6	16747.7	16747.7	16747.7	38039.3	16747.7	27630.5	53292.5	54497.8	48821.3	75808.7	16747.7	16747.7	38657.2	38259.3	66935	90381.7	53203.6	46852.2	29242.2	39698	48443.5	40428.7	38039.3	92019.3	68591	75649.9
123	Mup6;Mup9;Mup4;Mup8;Mup19;Mup11	20	3	0	82.2	14.4	0	20.649	0	57.089	1192900000	59	108450000	A2CGB6;A2BIM8;P02762;A2AKN9;P04938;A9C497;A9C496;A2BIN0	A2CGB6;A2BIM8;P02762;A2AKN9;P04938;A9C497;A9C496;A2BIN0	Major urinary protein 6;Major urinary proteins 11 and 8	3.09721e+06	1.67173e+06	561786	2.6659e+06	380531	502770	3.11324e+06	16747.7	325250	1.42038e+06	2.01541e+06	348181	16747.7	16747.7	3.979e+06	16747.7	16747.7	16747.7	16747.7	16747.7	6.5223e+06	16747.7	16747.7	16747.7	1.06671e+06	16747.7	16747.7	3.01844e+06	418251	16747.7	16747.7	1.16488e+06	1.15334e+06
124	Mup10	21	21	1	93.3	93.3	17.2	20.681	0	323.31	47600000000	1311	4326800000	A2BIN1	A2BIN1		6.55721e+07	4.23782e+07	3.33496e+07	4.82405e+07	3.00835e+07	2.57494e+07	7.14139e+07	1.97032e+07	2.24253e+07	3.01767e+07	5.60979e+07	3.04786e+07	3.26556e+07	3.59893e+07	8.55826e+07	3.6315e+07	2.59383e+07	7.33042e+07	3.22659e+07	2.35303e+07	111265046	4.571e+07	4.12545e+07	3.35816e+07	4.94242e+07	2.33754e+07	4.54227e+07	1.17033e+08	2.83301e+07	2.00171e+07	9.16247e+06	4.97648e+07	3.7066e+07
125	Mup14	19	2	0	82.2	8.9	0	20.668	0.0058594	3.1679	228530000	29	19044000	A2CEK7	A2CEK7		706477	16747.7	16747.7	295601	16747.7	16747.7	282724	16747.7	16747.7	16747.7	16747.7	16747.7	16747.7	16747.7	16747.7	16747.7	16747.7	16747.7	16747.7	16747.7	1.49514e+06	16747.7	16747.7	16747.7	16747.7	16747.7	16747.7	1.45932e+06	16747.7	16747.7	16747.7	439609	16747.7
126	Mup1;Mup15	20	2	0	82.2	12.8	0	20.648	0	10.174	735780000	38	66889000	Q58ES8;A2CEL1;P11588;A9R9W0;A2CEL0	Q58ES8;A2CEL1;P11588;A9R9W0;A2CEL0	Major urinary protein 1	4.55871e+06	3.38166e+06	720803	3.75838e+06	559056	1.03399e+06	1.51936e+06	16747.7	16747.7	826836	16747.7	16747.7	16747.7	16747.7	5.77751e+06	16747.7	16747.7	7.27872e+06	16747.7	16747.7	1.33163e+07	16747.7	1.07289e+06	16747.7	1.34959e+06	16747.7	16747.7	1.3482e+06	16747.7	16747.7	16747.7	701027	16747.7
127	Gp1ba	12	12	12	19.8	19.8	19.8	80.054	0	252.59	9610000000	801	457810000	A2CFB8;O35930	A2CFB8;O35930	Platelet glycoprotein Ib alpha chain	4.80119e+06	6.23611e+06	5.22827e+06	5.48308e+06	2.54037e+06	2.56859e+06	7.83681e+06	5.88542e+06	7.15513e+06	7.48178e+06	3.80994e+06	6.57371e+06	1.04222e+07	6687498	8.11382e+06	4.69822e+06	6.2154e+06	6.6383e+06	4.59011e+06	5.19674e+06	5.57516e+06	6.28336e+06	7.03909e+06	7.42603e+06	6.96455e+06	5.6725e+06	5.9878e+06	9.28293e+06	7.01033e+06	6.03599e+06	4.56477e+06	6.75654e+06	7.75596e+06
128	Pepd	2	2	2	3.7	3.7	3.7	55.028	0.0020534	3.9987	99664000	39	3986600	A2RS23;Q11136	A2RS23;Q11136	Xaa-Pro dipeptidase	16747.7	65934.2	16747.7	16747.7	16747.7	100662	16747.7	110025	16747.7	16747.7	61113.4	103500	114740	16747.7	16747.7	16747.7	16747.7	41389	16747.7	16747.7	89754	111349	62008.1	81787.8	114842	16747.7	16747.7	16747.7	16747.7	126136	16747.7	107855	95468.4
129	Ckm	18	18	18	51.4	51.4	51.4	43.044	0	65.085	939730000	118	46986000	A2RTA0;P07310	A2RTA0;P07310	Creatine kinase M-type	16747.7	716171	16747.7	16747.7	683574	556633	16747.7	1.31223e+06	16747.7	1.83982e+06	1.49218e+06	778196	1.35712e+06	936982	809778	543765	881126	16747.7	363881	334335	693513	242038	394940	1.15531e+06	427276	393785	490344	429071	519130	16747.7	16747.7	425441	374796
130	Cep250	2	2	2	0.9	0.9	0.9	278.84	0.0020619	4.1103	1040000000	68	7250100	E9Q5A8;A3KGJ7;Q60952	E9Q5A8;A3KGJ7;Q60952	Centrosome-associated protein CEP250	16747.7	16747.7	38951.9	16747.7	16747.7	16747.7	16747.7	16747.7	16747.7	16747.7	16747.7	16747.7	16747.7	16747.7	16747.7	16747.7	16747.7	16747.7	16747.7	16747.7	16747.7	16747.7	16747.7	16747.7	16747.7	16747.7	16747.7	16747.7	16747.7	16747.7	16747.7	16747.7	16747.7
131	Itih4	71	1	1	73.8	2.3	2.3	104.66	0	29.894	3963300000	112	88073000	A6X935;E9Q5L2	A6X935;E9Q5L2	Inter alpha-trypsin inhibitor, heavy chain 4	1.34067e+06	2.1807e+06	1.42737e+06	1.14464e+06	1.94615e+06	1.98303e+06	1.01435e+06	2.03339e+06	1.02084e+06	2.0402e+06	16747.7	16747.7	2.01796e+06	16747.7	1.62972e+06	2.21707e+06	95636.2	1.12323e+06	2.69985e+06	1.14578e+06	156647	135852	1.75424e+06	2.68057e+06	16747.7	213351	120549	100089	432588	1.93398e+06	244806	587734	481986
132	Hbbt1;Hbb-bs;Hbb-b1	19	19	13	84.4	84.4	69.4	15.748	0	323.31	489000000000	2800	44400000000	A8DUK4;E9Q223;P02088;P02104	A8DUK4;E9Q223;P02088	Hemoglobin subunit beta-1	5.93487e+08	5.85361e+08	8.31656e+08	8.34e+08	6.53725e+08	6.65487e+08	8.6104e+08	6.63323e+08	3.40923e+08	5.57881e+08	5.96633e+08	5.29726e+08	9.05224e+08	8.73713e+08	7.45255e+08	7.42179e+08	7.12317e+08	6.29002e+08	5.21015e+08	6.36963e+08	7.13903e+08	6.98124e+08	6.72886e+08	5.43893e+08	9.76881e+08	3.71836e+08	6.74082e+08	1241735978	4.85246e+08	4.7334e+08	4.05819e+08	4.02565e+08	6.18378e+08
133	Sell	5	5	5	14.9	14.9	14.9	38.462	0	13.891	1260000000	153	90072000	Q3TCF3;Q3UV83;B1B507;P18337	Q3TCF3;Q3UV83;B1B507;P18337	L-selectin	1.87319e+06	2.31794e+06	1.80676e+06	1.56827e+06	1.72748e+06	3.49583e+06	3.3567e+06	4.26228e+06	3.22383e+06	4.89132e+06	4.10764e+06	5.07936e+06	6.23749e+06	3.47301e+06	5.0323e+06	4.26643e+06	3.88947e+06	3.60278e+06	5.65128e+06	3.57833e+06	3.85385e+06	4.08071e+06	4.29654e+06	5.20131e+06	839028	515100	560474	461665	1.47595e+06	789548	567856	16747.7	232531
134	Actb	34	34	1	77.9	77.9	4.5	41.736	0	323.31	58500000000	2499	2925500000	B2RRX1;P60710;E9Q1F2;E9Q5F4;E9Q2D1	B2RRX1;P60710;E9Q1F2;E9Q5F4	Actin, cytoplasmic 1;Actin, cytoplasmic 1, N-terminally processed	2.92397e+07	2.64516e+07	3.16043e+07	3.17754e+07	6.12856e+07	5.45095e+07	4.50603e+07	7.36276e+07	4.31209e+07	8.41137e+07	6.28113e+07	7.77163e+07	9.11405e+07	8.92689e+07	7.52338e+07	5.76291e+07	6.64111e+07	5.23055e+07	6.16664e+07	120353312	9.54231e+07	1.34277e+08	7.61007e+07	9.97917e+07	4.38826e+07	2.02445e+07	3.09067e+07	3.36586e+07	1.7852e+07	3.07131e+07	2.50502e+07	3.0914e+07	2.60813e+07
135	Hist1h2bm;Hist1h2bc;Hist2h2bb;Hist1h2bh;Hist1h2bk;Hist1h2br;Hist1h2bp;Hist1h2bb;Hist1h2bf;Hist3h2ba;Hist3h2bb;Hist2h2be;Hist1h2ba	5	5	5	38.9	38.9	38.9	13.936	0	17.644	150210000	27	21459000	B2RTK3;Q6ZWY9;Q64525;Q64478;P10854;B2RVD5;Q8CBB6;Q8CGP2;Q8CGP1;Q64475;P10853;Q9D2U9;Q8CGP0;Q64524;P70696;G3X9D5	B2RTK3;Q6ZWY9;Q64525;Q64478;P10854;B2RVD5;Q8CBB6;Q8CGP2;Q8CGP1;Q64475;P10853;Q9D2U9;Q8CGP0;Q64524;P70696	Histone H2B;Histone H2B type 1-C/E/G;Histone H2B type 2-B;Histone H2B type 1-H;Histone H2B type 1-M;Histone H2B type 1-P;Histone H2B type 1-K;Histone H2B type 1-B;Histone H2B type 1-F/J/L;Histone H2B type 3-A;Histone H2B type 3-B;Histone H2B type 2-E;Histone H2B type 1-A	431793	16747.7	16747.7	16747.7	16747.7	16747.7	16747.7	16747.7	16747.7	2.21789e+06	1.97337e+06	1.97237e+06	16747.7	1.39048e+06	16747.7	16747.7	16747.7	1.05886e+06	1.9769e+06	6.07941e+06	601060	4.37567e+06	16747.7	16747.7	774985	16747.7	16747.7	16747.7	16747.7	16747.7	16747.7	16747.7	16747.7
136	Thbs4	17	17	14	22.8	22.8	19.1	106.37	0	147.84	6743200000	797	187310000	B2RTL6;Q9Z1T2	B2RTL6;Q9Z1T2	Thrombospondin-4	2.99321e+06	4.17519e+06	3.93941e+06	2.72309e+06	2.6576e+06	2.97134e+06	1.48579e+06	2.9672e+06	2.80864e+06	3.91708e+06	5.18622e+06	3.53654e+06	5.68575e+06	2.95049e+06	4.20093e+06	3.01157e+06	2.35022e+06	1.18095e+06	4.95885e+06	2.12976e+06	1.56627e+06	2.84824e+06	2.84058e+06	4.28187e+06	2.3784e+06	2.80864e+06	1.86718e+06	1.98626e+06	2.02546e+06	2.27339e+06	2.19285e+06	3.18074e+06	2.28728e+06
137	Hist2h4;Hist1h4a	5	5	5	50.5	50.5	50.5	11.367	0	11.02	99761000	20	16627000	B2RTM0;P62806	B2RTM0;P62806	Histone H4	16747.7	16747.7	16747.7	16747.7	16747.7	16747.7	16747.7	16747.7	16747.7	1.49267e+06	901859	16747.7	16747.7	1.08543e+06	2.21084e+06	685692	1.02555e+06	16747.7	16747.7	3.78078e+06	422221	5.30807e+06	16747.7	4.20093e+06	16747.7	16747.7	16747.7	16747.7	16747.7	16747.7	16747.7	16747.7	16747.7
138	Mgam	37	14	13	26.7	12	11.1	208.55	0	90.832	2711700000	233	30814000	B5THE2;Q6XK23	B5THE2		398029	148972	306791	475987	49211.8	107639	494945	283550	337405	464248	457263	419007	730956	363337	528301	356552	157062	121225	73375.9	90862.5	387984	500341	188435	245655	393273	246370	141900	323972	336304	199853	222996	254633	314566
139	Flna	4	4	4	2.2	2.2	2.2	274.63	0.0021097	4.4304	11842000	5	89714	B7FAV1;B7FAU9;Q8BTM8;F6XC15;D3YW87;D3Z576;Q8VHX6	B7FAV1;B7FAU9;Q8BTM8	Filamin-A	16747.7	16747.7	16747.7	16747.7	16747.7	16747.7	16747.7	16747.7	16747.7	16747.7	16747.7	16747.7	16747.7	16747.7	16747.7	16747.7	16747.7	16747.7	16747.7	16747.7	16747.7	16747.7	16747.7	28064.7	16747.7	16747.7	16747.7	16747.7	16747.7	16747.7	16747.7	16747.7	16747.7
140	Bpifa2	5	5	5	34.1	34.1	34.1	22.321	0	29.437	223260000	26	24806000	B7ZCG3;P07743	B7ZCG3;P07743	BPI fold-containing family A member 2	16747.7	16747.7	16747.7	16747.7	16747.7	16747.7	16747.7	16747.7	16747.7	16747.7	16747.7	16747.7	16747.7	16747.7	16747.7	16747.7	16747.7	16747.7	16747.7	16747.7	16747.7	16747.7	16747.7	16747.7	16747.7	16747.7	16747.7	16747.7	16747.7	16747.7	16747.7	16747.7	581883
141	Gm20547;Cfb	93	93	67	62.1	62.1	41.5	142.32	0	323.31	240000000000	7222	3757100000	B8JJN0;F6VQX8;Q3UEG8;B8JJM5;P04186;F6XQ00;B8JJM6;H3BK95;F6W2T4;B8JJM3;F6ZCY7;F6WZA2	B8JJN0;F6VQX8;Q3UEG8;B8JJM5;P04186;F6XQ00;B8JJM6	Complement factor B;Complement factor B Ba fragment;Complement factor B Bb fragment	6.05787e+07	5.31755e+07	5.93381e+07	4.6805e+07	8.58454e+07	8.05774e+07	4.92381e+07	5.16628e+07	4.45032e+07	6.13907e+07	6.11344e+07	4.58891e+07	5.31042e+07	4.42956e+07	5.14616e+07	5.38534e+07	4.44952e+07	4.26085e+07	42004863	4.15759e+07	4.12043e+07	4.32516e+07	5.4839e+07	5.2878e+07	3.4614e+07	3.44001e+07	4.84025e+07	4.62245e+07	2.8986e+07	4.59503e+07	2.77236e+07	3.6622e+07	4.88968e+07
142	C2	32	6	6	57.1	14.9	14.9	69.685	0	22.55	1923500000	185	56574000	B8JJN2;P21180;B8JJM9	B8JJN2;P21180;B8JJM9	Complement C2;Complement C2b fragment;Complement C2a fragment	751337	740651	780579	673698	325172	638259	916972	954163	481167	590991	927181	1.02448e+06	1.11913e+06	246575	1.05781e+06	424376	641030	258328	702059	584583	849610	620147	539371	667280	965894	631799	640911	687742	466908	1.15433e+06	532293	501859	1.20374e+06
143	Scgb1b20;Abpa29_a7	3	3	3	39.8	39.8	39.8	10.104	0	53.677	725290000	79	120880000	E9PWZ2;D2XZ31;A0A087WQJ0	E9PWZ2;D2XZ31		419040	1.4683e+06	16747.7	16747.7	16747.7	1.34077e+06	16747.7	16747.7	16747.7	1.03601e+06	488216	16747.7	2.19335e+06	16747.7	903960	5.53897e+06	484209	16747.7	16747.7	16747.7	1.20374e+06	16747.7	16747.7	16747.7	16747.7	16747.7	16747.7	16747.7	4.15251e+06	16747.7	16747.7	2.65445e+06	1.1781e+06
144	C7	45	45	45	58.3	58.3	58.3	93.337	0	323.31	52400000000	2695	1068800000	D3YXF5	D3YXF5		1.8973e+07	2.48732e+07	1.90283e+07	2.24863e+07	1.97577e+07	1.83158e+07	1.85124e+07	8.13794e+06	1.14832e+07	1.88026e+07	1.43341e+07	1.01294e+07	1.06197e+07	9.66442e+06	1.90596e+07	1.54415e+07	1.03457e+07	2.32367e+07	9.96735e+06	8.03206e+06	1.39353e+07	1.23279e+07	1.46058e+07	1.83367e+07	2.14541e+07	6.84601e+06	1.15513e+07	1.54065e+07	9.2725e+06	1.01882e+07	4.32147e+06	1.02615e+07	1.90898e+07
145	Scgb2b7	5	5	3	57.1	57.1	31.2	12.585	0	36.403	418060000	72	83611000	D3YYY1;Q9JI02;A0A087WR49;A0A087WPA9	D3YYY1		2.08907e+06	2.70448e+06	16747.7	16747.7	16747.7	16747.7	16747.7	16747.7	16747.7	5.66798e+06	1.3552e+06	16747.7	4.53782e+06	1.26847e+06	1.48212e+06	4.34972e+06	376344	16747.7	16747.7	16747.7	1.98289e+06	16747.7	16747.7	16747.7	16747.7	406581	2.64157e+06	362677	2.69985e+06	16747.7	16747.7	1.80777e+06	1.67617e+06
146	Tpm3;Tpm3-rs7;Tpm2;Tpm1	2	2	2	11.7	11.7	11.7	28.723	0.002045	3.957	28382000	8	1669500	D3Z6I8;E9Q7Q3;D3Z2H9;Q8K0Z5;E9Q5J9;P21107;D3YVR0;A2AIM5;S4R2U0;G5E8R0;E9Q453;G5E8R2;G5E8R1;E9Q456;E9Q455;E9Q452;Q8BSH3;Q8BP43;E9Q450;E9Q448;B7ZNL3;A2AIM4;E9Q454;F8WID5;P58774;P58771	D3Z6I8;E9Q7Q3;D3Z2H9;Q8K0Z5;E9Q5J9;P21107;D3YVR0;A2AIM5;S4R2U0;G5E8R0;E9Q453;G5E8R2;G5E8R1;E9Q456;E9Q455;E9Q452;Q8BSH3;Q8BP43;E9Q450;E9Q448;B7ZNL3;A2AIM4;E9Q454;F8WID5;P58774;P58771	Tropomyosin alpha-3 chain;Tropomyosin beta chain;Tropomyosin alpha-1 chain	16747.7	16747.7	16747.7	16747.7	210194	16747.7	16747.7	16747.7	16747.7	363881	16747.7	16747.7	16747.7	16747.7	16747.7	16747.7	16747.7	16747.7	147404	530834	164001	471148	54306.2	16747.7	16747.7	16747.7	16747.7	16747.7	16747.7	16747.7	16747.7	16747.7	16747.7
147	Ces1b	30	18	18	57.1	44.8	44.8	62.196	0	323.31	23100000000	833	889770000	D3Z5G7;Q3UW56;Q8VCC2	D3Z5G7	Carboxylic ester hydrolase	5.37472e+06	1.03318e+07	1.30789e+07	8.65288e+06	3.84784e+06	4.61872e+06	1.1204e+07	8.5485e+06	9.18909e+06	9.36454e+06	1.19852e+07	7.20866e+06	1.41853e+07	8.32946e+06	7.46886e+06	6.18289e+06	9.54209e+06	5.30179e+06	8.645e+06	5.49566e+06	8.08107e+06	6.52418e+06	7.46252e+06	1.07377e+07	5.2109e+06	4.29092e+06	4.26498e+06	5.05392e+06	4.07346e+06	4.10764e+06	7.81917e+06	7.6088e+06	8.86895e+06
148	Ctse	3	3	3	7.1	7.1	7.1	39.247	0.0021786	5.0299	195860000	28	39172000	D3Z6T3;P70269	D3Z6T3;P70269	Cathepsin E	16747.7	1.06707e+06	16747.7	16747.7	16747.7	16747.7	1.12349e+06	16747.7	16747.7	2.33413e+06	16747.7	16747.7	16747.7	5.24484e+06	16747.7	16747.7	2.13348e+06	1.5612e+06	3.99191e+06	16747.7	1.64157e+06	2.80029e+06	16747.7	2.43252e+06	7.53927e+06	1.19368e+06	2.33616e+06	4.08815e+06	16747.7	16747.7	16747.7	16747.7	16747.7
149	Sirpa	2	2	2	4.7	4.7	4.7	55.986	0.0020704	4.1556	35640000	9	1425600	Q6P6I8;E0CYM8;A2ANC1;E9QPT7	Q6P6I8;E0CYM8;A2ANC1;E9QPT7		16747.7	16747.7	16747.7	16747.7	173870	186347	16747.7	200178	16747.7	16747.7	113222	16747.7	233369	153816	189469	16747.7	16747.7	16747.7	131249	16747.7	16747.7	16747.7	16747.7	16747.7	16747.7	16747.7	16747.7	16747.7	16747.7	16747.7	16747.7	16747.7	16747.7
150	Fga	30	30	30	47.4	47.4	47.4	87.428	0	323.31	11300000000	889	306670000	E9PV24	E9PV24	Fibrinogen alpha chain;Fibrinopeptide A;Fibrinogen alpha chain	7.30221e+06	1.39434e+07	3.23681e+06	4.70281e+06	6.10137e+06	9.42179e+06	5.73869e+06	5.33533e+06	1.42709e+06	5.17635e+06	3.68327e+06	4.74012e+06	3.14508e+06	4.15814e+06	6.14925e+06	4.44362e+06	3.156e+06	3.92808e+06	3.59877e+06	2.6408e+06	4.39541e+06	3.47375e+06	6.26886e+06	3.57589e+06	3.95912e+06	2.4297e+06	1.39531e+06	4.33656e+06	1.83982e+06	4.72657e+06	3.22238e+06	2.19773e+06	2.07249e+06
151	Itih4	71	71	1	73.8	73.8	2.2	104.59	0	323.31	352000000000	6858	7818100000	E9PVD2	E9PVD2		6.96942e+07	6.43896e+07	7.28919e+07	6.11862e+07	7.71991e+07	7.03761e+07	6.5204e+07	7.85514e+07	6.66331e+07	7.04811e+07	1.23046e+08	9.76414e+07	1.16185e+08	7.59282e+07	7.08231e+07	9.24784e+07	7.06375e+07	4.88153e+07	7.25707e+07	7.26619e+07	6.8984e+07	8.2893e+07	1.08991e+08	9.29438e+07	6.39216e+07	5.36311e+07	8.57312e+07	6.93756e+07	5.99922e+07	1.28373e+08	7.67455e+07	7.45133e+07	7.78512e+07
152	Psap	15	15	15	35.4	35.4	35.4	60.672	0	62.068	2478100000	369	77441000	E9PZ00;Q8BFQ1;K3W4L3;Q3UFE8;J3QPG5;Q61207	E9PZ00;Q8BFQ1;K3W4L3;Q3UFE8;J3QPG5;Q61207	Prosaposin	1.11716e+06	980899	1.2023e+06	959422	486507	927454	510638	1.24377e+06	235637	1.52449e+06	662211	1.31529e+06	1.62251e+06	818719	2.02138e+06	1.32451e+06	412747	469848	1.75792e+06	641816	922935	2.6014e+06	1.5703e+06	1.66618e+06	1.01181e+06	914414	1.29707e+06	1.18652e+06	254339	1.3251e+06	213231	1.03161e+06	563005
153	Cp	100	2	2	74.6	3.4	3.4	124.21	0	161.41	1660000000	66	32000000	E9PZD8;Q61147	E9PZD8;Q61147	Ceruloplasmin	838788	1.83606e+06	1.26094e+06	932564	4.10695e+06	4.27875e+06	844183	2.58648e+06	613194	1.08949e+06	442047	1.10371e+06	795628	1.23604e+06	1.08552e+06	1.75047e+06	233498	1.32e+06	1.47595e+06	269396	620846	732115	224963	1.00147e+06	128126	177386	183797	121150	131249	169876	16747.7	16747.7	120527
154	Habp2	17	17	17	42.9	42.9	42.9	57.326	0	205.32	7493500000	654	356830000	Q3V1J8;E9Q092;E9QM92;Q8K0D2;F7B276;E9Q0C5	Q3V1J8;E9Q092;E9QM92;Q8K0D2	Hyaluronan-binding protein 2;Hyaluronan-binding protein 2 50 kDa heavy chain;Hyaluronan-binding protein 2 50 kDa heavy chain alternate form;Hyaluronan-binding protein 2 27 kDa light chain;Hyaluronan-binding protein 2 27 kDa light chain alternate form	4.4883e+06	5.57966e+06	6.52028e+06	3.62056e+06	2.33689e+06	3.71573e+06	4.75521e+06	4.17718e+06	3.51025e+06	6.81032e+06	6.40449e+06	5.5678e+06	4.76402e+06	5.34004e+06	7.1855e+06	4.0974e+06	5.00397e+06	4.94386e+06	7.48178e+06	1.86114e+06	6.75535e+06	3.85558e+06	5.2559e+06	5.92191e+06	4.50166e+06	3.51025e+06	4.02074e+06	3.62514e+06	2.80381e+06	4.2598e+06	3.10062e+06	4.46911e+06	5.17011e+06
155	Fcgbp	16	16	16	9.3	9.3	9.3	275.24	0	47.945	468820000	84	5717300	E9Q9C6;E9Q0B5;E9PVG8	E9Q9C6;E9Q0B5		178281	117448	169804	110304	365746	270326	38203.8	116550	64614.6	268583	268977	178433	300508	888477	166837	40160.4	179794	30173.4	40428.7	69253.3	16747.7	104558	16747.7	60681.8	141193	16747.7	16747.7	16747.7	16747.7	16747.7	193899	16747.7	16747.7
156	Krt78	3	2	2	2	1.3	1.3	112.26	0.0022026	5.301	49053000	5	605600	E9Q0F0	E9Q0F0		16747.7	16747.7	16747.7	16747.7	16747.7	16747.7	16747.7	16747.7	16747.7	16747.7	16747.7	16747.7	16747.7	528059	16747.7	16747.7	16747.7	16747.7	16747.7	16747.7	16747.7	16747.7	16747.7	16747.7	16747.7	16747.7	16747.7	16747.7	16747.7	16747.7	16747.7	16747.7	16747.7
157	Trf	28	2	2	68.4	8.8	8.8	18.827	0	66.6	504150000	49	56016000	E9Q2Q7	E9Q2Q7		16747.7	16747.7	16747.7	16747.7	16747.7	16747.7	16747.7	16747.7	16747.7	16747.7	16747.7	16747.7	16747.7	16747.7	16747.7	16747.7	16747.7	16747.7	16747.7	16747.7	16747.7	16747.7	16747.7	16747.7	16747.7	16747.7	16747.7	16747.7	16747.7	16747.7	16747.7	16747.7	16747.7
158	Apob	166	166	166	36.9	36.9	36.9	509.43	0	323.31	141000000000	7142	621640000	E9Q414;E9Q1Y3;E9Q4G4;F7A3M3	E9Q414;E9Q1Y3	Apolipoprotein B-100;Apolipoprotein B-48	8.07042e+06	7.57801e+06	9.14327e+06	7.26291e+06	5.96336e+06	5.78288e+06	5.32125e+06	5.2353e+06	6.4584e+06	9.0174e+06	9.18725e+06	9.54847e+06	8.95621e+06	6.10181e+06	8.71106e+06	6.84992e+06	5.51467e+06	4.74735e+06	8.87203e+06	5.08454e+06	4.96026e+06	6.04831e+06	7.18187e+06	7.72471e+06	5.72967e+06	4.71749e+06	7.22032e+06	4.51004e+06	3.45016e+06	6.62654e+06	5.11046e+06	7.93071e+06	5.90579e+06
159	C1s1;C1sa	43	43	28	62.4	62.4	44.1	77.499	0	323.31	49100000000	2622	1754400000	E9Q6C2;Q8CG14;E0CZE7	E9Q6C2;Q8CG14	Complement C1s-A subcomponent;Complement C1s-A subcomponent heavy chain;Complement C1s-A subcomponent light chain	3.3062e+07	3.35103e+07	4.13587e+07	3.35952e+07	1.51381e+07	1.68122e+07	2.85271e+07	2.56159e+07	2.66023e+07	3.07227e+07	3.01472e+07	2.61153e+07	3.1859e+07	2.23947e+07	3.29522e+07	1.96266e+07	1.93351e+07	1.69375e+07	2.16713e+07	1.93101e+07	2.41626e+07	2.30398e+07	1.82511e+07	2.79248e+07	2.22961e+07	1.81999e+07	1.59577e+07	2.16456e+07	1.36845e+07	1.85298e+07	1.11253e+07	1.84948e+07	2.0295e+07
160	Il1rap	26	26	26	23.3	23.3	23.3	73.516	0	216.04	56600000000	1738	1571700000	E9Q6I2;Q3UVZ1;Q61730;G3UY13	E9Q6I2;Q3UVZ1;Q61730;G3UY13	Interleukin-1 receptor accessory protein	2.49978e+07	2.58988e+07	2.87011e+07	2.16059e+07	1.2124e+07	1.43824e+07	1.74549e+07	1.17754e+07	1.89447e+07	2.2623e+07	2.24104e+07	2.01857e+07	2.81093e+07	2.32367e+07	2.18677e+07	1.38716e+07	1.19683e+07	1.43249e+07	1.39977e+07	9.39036e+06	2.27056e+07	1.15627e+07	1.61104e+07	2.29299e+07	2.41993e+07	1.43115e+07	1.71113e+07	2.03883e+07	1.42732e+07	1.08008e+07	1.04182e+07	1.3086e+07	1.76684e+07
161	Gm4788	25	20	19	34.6	30.7	29.7	99.437	0	87.418	9024100000	355	237480000	E9Q8B5;E9PUM5;E9Q8B6	E9Q8B5;E9PUM5;E9Q8B6		3.79884e+06	3.83491e+06	3.5109e+06	2.36529e+06	3.25654e+06	5.5456e+06	4.51789e+06	505052	497736	663197	5.79852e+06	5.99857e+06	6.80448e+06	3.5369e+06	5.89346e+06	3.9341e+06	5.31484e+06	971130	3.81754e+06	1.82569e+06	5.26925e+06	4.60227e+06	6.02309e+06	4.82547e+06	16747.7	2.20282e+06	2.92219e+06	2.36736e+06	2.18241e+06	2.15196e+06	1.82913e+06	3.57749e+06	2.92945e+06
162	Cfh	111	111	96	77.2	77.2	68.9	141.27	0	323.31	724000000000	13751	12500000000	E9Q8I0;P06909;D6RGQ0;E9Q8H9;A0A0A6YWP4;A0A0A6YVP8	E9Q8I0;P06909;D6RGQ0;E9Q8H9;A0A0A6YWP4;A0A0A6YVP8	Complement factor H	1.87339e+08	1.3788e+08	163980396	1.56677e+08	1.74293e+08	2.1658e+08	1.76086e+08	157727254	1.21844e+08	181621863	1.5505e+08	1.83745e+08	1.80614e+08	1.43036e+08	1.38533e+08	1.80247e+08	1.58407e+08	1.20986e+08	1.21301e+08	187468574	1.36941e+08	1.8835e+08	1.63512e+08	1.5901e+08	1.81565e+08	1.40893e+08	1.60492e+08	1.28483e+08	1.33658e+08	1.99912e+08	1.1124e+08	149373192	175105190
163	Dspp	4	4	4	6.1	6.1	6.1	95.124	0	82.479	438300000	89	24350000	E9Q9Z9;P97399	E9Q9Z9;P97399	Dentin sialophosphoprotein;Dentin phosphoprotein;Dentin sialoprotein	508162	16747.7	329197	16747.7	266285	340106	464248	615514	143362	229729	16747.7	276972	585594	94320.9	581614	318662	164445	190122	138233	311727	283703	213019	319426	305767	488715	16747.7	16747.7	16747.7	16747.7	331630	409771	16747.7	422221
164	Pi16	6	6	6	23.1	23.1	23.1	53.649	0	143.08	3610500000	303	171930000	E9QNE5;Q9ET66;D3Z6T6;F6QYZ5	E9QNE5;Q9ET66;D3Z6T6;F6QYZ5	Peptidase inhibitor 16	3.95151e+06	1.97377e+06	2.24784e+06	2.23574e+06	2.38488e+06	1.93941e+06	2.05834e+06	3.95327e+06	1.35675e+06	2.79622e+06	2.40596e+06	2.66935e+06	2.75815e+06	1.9371e+06	2.94138e+06	2.01269e+06	2.30163e+06	2.00951e+06	2.75346e+06	1.78859e+06	2.77014e+06	4.75975e+06	121661	684610	1.37993e+06	944556	979366	547641	311575	976681	1.16179e+06	608715	1.32592e+06
165	Apoc3	6	6	6	42.3	42.3	42.3	15.163	0	323.31	95000000000	1634	13600000000	E9QP56;P33622	E9QP56;P33622	Apolipoprotein C-III	2.33316e+08	3.44163e+08	2.58878e+08	1.93614e+08	4.50905e+08	4.99368e+08	2.46772e+08	3.51419e+08	2.07131e+08	2.66639e+08	2.36256e+08	2.69418e+08	2.34127e+08	255304029	2.21291e+08	1.61941e+08	1.94452e+08	1.90995e+08	1.98352e+08	1.44824e+08	166979093	2.47472e+08	1.91033e+08	2.03775e+08	1.92186e+08	2.3597e+08	2.00178e+08	1.66769e+08	1.86595e+08	1.34061e+08	1.07158e+08	2.03311e+08	1.95575e+08
166	Vwf	30	30	30	13.4	13.4	13.4	309.15	0	323.31	9639100000	853	81001000	E9QPU1;Q8CIZ8;Q3TPE1;Q3TD35	E9QPU1;Q8CIZ8	von Willebrand factor;von Willebrand antigen 2	938791	1.18385e+06	1.03863e+06	1.25235e+06	942390	1.1515e+06	969014	758132	863583	1.2681e+06	854594	754718	1.26775e+06	1.0309e+06	1.51663e+06	967775	902894	776696	537077	466681	826836	1.00401e+06	459425	1.17984e+06	1.22156e+06	671279	776271	1.01504e+06	555849	742525	609143	983610	898313
167	Gm5160;Ppia	2	2	2	19.7	19.7	19.7	16.314	0.001996	3.6829	72994000	10	7299400	F8VPN3;Q5SVY2;P17742	F8VPN3;Q5SVY2;P17742	Peptidyl-prolyl cis-trans isomerase;Peptidyl-prolyl cis-trans isomerase A;Peptidyl-prolyl cis-trans isomerase A, N-terminally processed	16747.7	16747.7	16747.7	16747.7	1.4454e+06	1.30717e+06	16747.7	651766	16747.7	16747.7	289854	16747.7	881974	864767	16747.7	16747.7	1.05368e+06	16747.7	16747.7	16747.7	16747.7	564139	1.01712e+06	16747.7	16747.7	16747.7	16747.7	16747.7	16747.7	16747.7	16747.7	16747.7	16747.7
168	Ecm1	4	4	4	9.5	9.5	9.5	62.717	0.0021552	4.8659	80983000	15	2612400	F8WI14;Q61508;D3Z772;D3YV22;D3Z0U9;D3Z038;D3YV64	F8WI14;Q61508	Extracellular matrix protein 1	16747.7	16747.7	16747.7	16747.7	124372	597267	16747.7	16747.7	16747.7	98403.5	16747.7	80287.9	16747.7	16747.7	16747.7	16747.7	16747.7	16747.7	16747.7	16747.7	16747.7	16747.7	16747.7	16747.7	16747.7	16747.7	16747.7	16747.7	16747.7	16747.7	16747.7	16747.7	16747.7
169	Spp1	1	1	1	4.4	4.4	4.4	32.459	0.0023041	6.5812	64943000	23	5903900	Q547B5;F8WIP8;P10923	Q547B5;F8WIP8;P10923	Osteopontin	163124	191423	201667	200920	278441	469464	16747.7	315429	16747.7	16747.7	218450	16747.7	271047	16747.7	321791	16747.7	16747.7	16747.7	16747.7	16747.7	16747.7	16747.7	16747.7	16747.7	329161	185317	16747.7	16747.7	16747.7	16747.7	16747.7	16747.7	16747.7
170	Cycs;Gm10108	7	7	7	44.8	44.8	44.8	11.605	0	8.9591	126790000	26	21132000	Q56A15;G3UWG1;P62897;P00015	Q56A15;G3UWG1;P62897	Cytochrome c, somatic	16747.7	545781	16747.7	16747.7	16747.7	16747.7	16747.7	16747.7	16747.7	16747.7	2.15196e+06	2.26369e+06	2.80054e+06	16747.7	480137	3.40021e+06	584800	722471	16747.7	16747.7	16747.7	1.58966e+06	16747.7	814612	16747.7	16747.7	16747.7	16747.7	16747.7	16747.7	16747.7	16747.7	16747.7
171	Cp	101	101	3	76.3	76.3	3.4	121.08	0	323.31	1140000000000	18319	22400000000	G3X9T8;G3X8Q5;G3UXG1;G3UWP5;G3UZ53	G3X9T8;G3X8Q5		2.48215e+08	2.69418e+08	3.20852e+08	2.7763e+08	1.85277e+08	1.94247e+08	2.99283e+08	3.24913e+08	289627834	3.51419e+08	3.84934e+08	3.30366e+08	4.54515e+08	3.11318e+08	3.60888e+08	281670300	2.95501e+08	2.14481e+08	2.56499e+08	2.3518e+08	2.7736e+08	2.78619e+08	2.89972e+08	2.91024e+08	2.91826e+08	2.52298e+08	2.74551e+08	2.53854e+08	2.22718e+08	3.28712e+08	2.55862e+08	2.57734e+08	2.7736e+08
172	Ctsa	9	9	9	27.4	27.4	27.4	53.844	0	21.721	245320000	85	12266000	Q544R6;G3X8T3;P16675	Q544R6;G3X8T3;P16675	Carboxypeptidase;Lysosomal protective protein;Lysosomal protective protein 32 kDa chain;Lysosomal protective protein 20 kDa chain	16747.7	40613	16747.7	54987.1	40489.7	40026.2	16747.7	54888	39893.6	80614.5	16747.7	337405	401934	16747.7	16747.7	57105.2	89909.5	16747.7	448758	16747.7	61555.4	93529.3	523194	387943	16747.7	94285.2	79736.4	16747.7	81812.3	89128	63171.7	204181	16747.7
173	Serpina3n	37	37	32	62.2	62.2	51.2	46.766	0	323.31	1010000000000	6103	42100000000	G3X8T9;Q91WP6;F2Z405;Q5I2A0;Q6P4P1;H7BWY0;D3Z451	G3X8T9;Q91WP6	Serine protease inhibitor A3N	6.82519e+08	6.1706e+08	6.29002e+08	571596912	6.8985e+08	7.02359e+08	619875673	6.97599e+08	635784531	7.02801e+08	6.85654e+08	673366246	5.71425e+08	7.26117e+08	6.69597e+08	6.29002e+08	5.59249e+08	6.64429e+08	7.33827e+08	6.0764e+08	7.56586e+08	7.35375e+08	5.83821e+08	7.2799e+08	6.13831e+08	5.03992e+08	6.40757e+08	4.72184e+08	5.21015e+08	6.24381e+08	437581193	4.9167e+08	5.27776e+08
174	Itih2	42	42	42	46.5	46.5	46.5	106.36	0	323.31	363000000000	4739	7730000000	G3X977;Q61703;Q3UEG7;E0CX69	G3X977;Q61703;Q3UEG7	Inter-alpha-trypsin inhibitor heavy chain H2	1.12398e+08	9.212e+07	1.03874e+08	8.96674e+07	5.37728e+07	5.15186e+07	9.95764e+07	9.35168e+07	9.86177e+07	1.25571e+08	1.01246e+08	1.26939e+08	1.12365e+08	7.16091e+07	9.9352e+07	8.24008e+07	8.82165e+07	8.4859e+07	9.02732e+07	7.9891e+07	8.88085e+07	8.85764e+07	9.33186e+07	1.08009e+08	1.18045e+08	9.47272e+07	1.00356e+08	1.08192e+08	9.38044e+07	9.10655e+07	1.20575e+08	1.01665e+08	111265046
175	Apon	7	7	7	19.5	19.5	19.5	27.964	0	182.41	6390700000	252	399420000	G3X9D6	G3X9D6		139284	3.16858e+06	2.74119e+06	2.27179e+06	1.52408e+06	2.18573e+06	2.80001e+06	3.86702e+06	446719	16747.7	4.17806e+06	3.78789e+06	8.41842e+06	1.36177e+06	8.31978e+06	2.89592e+06	1.33379e+06	505643	1.19211e+06	1.99056e+06	4.62723e+06	1.48648e+06	3.56402e+06	2.04922e+06	6.6912e+06	3.22383e+06	3.41992e+06	5.17364e+06	2.5735e+06	4.56766e+06	1.6002e+06	4.54047e+06	2.7261e+06
176	Scgb2b2	4	4	4	41.2	41.2	41.2	12.956	0	14.018	223230000	39	44647000	G5E8B4;Q6UGQ3	G5E8B4;Q6UGQ3	Secretoglobin family 2B member 2	16747.7	16747.7	16747.7	16747.7	16747.7	16747.7	16747.7	16747.7	16747.7	1.14068e+06	16747.7	16747.7	2.66218e+06	16747.7	16747.7	16747.7	16747.7	16747.7	16747.7	16747.7	242431	16747.7	16747.7	16747.7	16747.7	16747.7	16747.7	16747.7	16747.7	16747.7	16747.7	16747.7	16747.7
177	Rbp4	12	12	12	60	60	60	28.405	0	89.059	2273300000	213	189440000	H7BWY6;Q00724	H7BWY6;Q00724	Retinol-binding protein 4	1.4001e+06	1.63173e+06	2.20865e+06	1.00654e+06	1.0528e+07	7.62588e+06	2.31794e+06	1.59548e+06	16747.7	4.43392e+06	1.56232e+06	3.47448e+06	3.96789e+06	4.61872e+06	1.66618e+06	3.84205e+06	5.62819e+06	3.08368e+06	2.07623e+06	2.90526e+06	3.19611e+06	1.13405e+07	9.07747e+06	7.02055e+06	647469	1.11115e+06	2.97856e+06	7.53678e+06	1.16285e+06	998922	665785	2.59713e+06	361108
178	Tpi1	6	6	6	42.5	42.5	42.5	17.997	0	14.364	167320000	58	13944000	H7BXC3;P17751	H7BXC3;P17751	Triosephosphate isomerase	16747.7	16747.7	16747.7	123756	16747.7	293590	479822	426531	16747.7	508674	368269	163896	815131	168448	1.11368e+06	171271	765267	136163	16747.7	16747.7	450352	194959	341649	265024	405425	128705	16747.7	168672	16747.7	16747.7	16747.7	16747.7	16747.7
179	Igkv4-71	2	1	0	39.6	18.8	0	10.328	0.0019646	3.3196	326590000	29	108860000	L7N239	L7N239		16747.7	16747.7	16747.7	16747.7	16747.7	16747.7	16747.7	16747.7	16747.7	5.87684e+06	16747.7	16747.7	16747.7	16747.7	16747.7	16747.7	16747.7	16747.7	16747.7	1.41449e+06	2.21294e+06	16747.7	1.68144e+06	16747.7	4.423e+06	16747.7	16747.7	16747.7	16747.7	16747.7	16747.7	16747.7	3.19611e+06
180	Kng1	46	46	4	52.2	52.2	7.9	73.101	0	323.31	1570000000000	9562	50700000000	O08677	O08677	Kininogen-1;Kininogen-1 heavy chain;Bradykinin;Kininogen-1 light chain	5.64576e+08	6.50263e+08	7.79959e+08	6.95913e+08	8.39064e+08	7.96196e+08	7.1548e+08	7.8371e+08	6.04673e+08	6.70277e+08	6.24381e+08	7.05875e+08	8.48804e+08	6.90288e+08	7.0424e+08	698796961	8.00897e+08	5.61569e+08	6.55439e+08	7.43354e+08	5.90304e+08	8.25272e+08	6.12297e+08	9.33605e+08	5.55128e+08	4.3977e+08	5.10816e+08	5.75475e+08	5.57881e+08	7.20432e+08	5.31761e+08	5.2384e+08	5.90304e+08
181	Psmb1	4	4	4	28.8	28.8	28.8	26.372	0	36.729	611080000	98	47006000	Q6RI64;O09061	Q6RI64;O09061	Proteasome subunit beta type;Proteasome subunit beta type-1	345169	649842	780579	597267	16747.7	16747.7	16747.7	473768	393785	16747.7	155015	489413	926246	909816	638565	605627	677191	586233	16747.7	372951	221626	777457	669503	1.02501e+06	16747.7	550570	93755.9	444537	407008	810286	645967	550958	876266
182	Man2b1	13	13	13	19.6	19.6	19.6	114.65	0	48.808	779240000	153	18553000	O09159	O09159	Lysosomal alpha-mannosidase	614984	793935	639318	379310	73545.7	122091	542874	734670	790413	448758	699019	622618	462018	175818	333030	95007.3	172201	172907	242789	280543	304169	654418	236191	1.0523e+06	204917	16747.7	71664.5	71965.6	16747.7	67830.6	77964	350751	304169
183	Sod3	12	12	12	64.1	64.1	64.1	27.392	0	131.16	5974900000	582	597490000	Q542X9;O09164	Q542X9;O09164	Superoxide dismutase [Cu-Zn];Extracellular superoxide dismutase [Cu-Zn]	1.17714e+07	1.10785e+07	1.51859e+07	1.28886e+07	1.69782e+07	1.47174e+07	1.48727e+07	1.51109e+07	1.02852e+07	1.36333e+07	1.03785e+07	1.32614e+07	1.36863e+07	1.23137e+07	8.52101e+06	7.16264e+06	7.68091e+06	1.33163e+07	1.16628e+07	6.46561e+06	1.2075e+07	1.26544e+07	8.69515e+06	9.75715e+06	1.01774e+07	6.18759e+06	6.12163e+06	9.74263e+06	9.06878e+06	5.28249e+06	1.06389e+07	9.0623e+06	5.36831e+06
184	Ifnar2;Gm21970	7	7	7	6.8	6.8	6.8	56.578	0	37.678	3428600000	272	171430000	O35664;H3BJ04;F7BJH9;F6XX07;H3BKB3	O35664;H3BJ04;F7BJH9;F6XX07	Interferon alpha/beta receptor 2	1.8365e+06	2.57603e+06	4.74159e+06	2.1941e+06	4.46065e+06	6.57371e+06	3.29418e+06	2.85138e+06	3.43559e+06	1.9579e+06	2.44925e+06	2.72194e+06	5.00451e+06	3.04942e+06	3.15096e+06	3.3264e+06	1.50454e+06	3.52427e+06	1.80007e+06	1.38133e+06	1.35636e+06	2.90475e+06	3.35421e+06	3.83175e+06	3.32889e+06	1.54516e+06	2.58123e+06	2.74262e+06	2.52104e+06	2.20004e+06	1.37646e+06	1.54915e+06	3.38374e+06
185	Dsg2	5	5	5	6.8	6.8	6.8	122.38	0	14.214	99186000	38	1803400	O55111;Q8VCE3;Q811I1	O55111;Q8VCE3;Q811I1	Desmoglein-2	16747.7	49371.6	69936.2	38892.2	16747.7	64847.5	120251	69660.5	29242.2	45642.1	100244	37358.9	45117.9	46190.9	47047.1	16747.7	16747.7	16747.7	16747.7	16747.7	16747.7	52853	16747.7	16747.7	16747.7	16747.7	16747.7	16747.7	16747.7	16747.7	16747.7	16747.7	16747.7
186	Fcna;Fcn1	14	14	14	39.8	39.8	39.8	36.298	0	164.49	10400000000	748	578040000	Q4FJM1;O70165	Q4FJM1;O70165	Ficolin-1	7.74801e+06	7.74959e+06	1.37215e+07	6.20523e+06	5.3535e+06	5.21722e+06	8.16703e+06	5.66033e+06	1.07377e+07	8.27164e+06	7.16776e+06	8.07573e+06	9.2905e+06	5.64909e+06	7.78203e+06	1.05653e+07	6.69044e+06	8.90463e+06	9.50019e+06	4.89084e+06	1.08678e+07	9.90597e+06	6.75775e+06	7.16096e+06	1.14961e+07	7.6187e+06	7.36569e+06	7.87847e+06	8.00412e+06	7.02658e+06	6.90535e+06	8.67951e+06	9.84796e+06
187	Psma3	6	6	6	22.4	22.4	22.4	28.405	0	10.79	209160000	53	16089000	Q58EV4;O70435;E0CX62;E0CZ34;F8WH02;E0CYL6	Q58EV4;O70435;E0CX62	Proteasome subunit alpha type;Proteasome subunit alpha type-3	302139	423625	16747.7	459321	16747.7	16747.7	16747.7	251830	193302	16747.7	16747.7	286790	16747.7	276606	16747.7	16747.7	133652	16747.7	16747.7	16747.7	16747.7	16747.7	16747.7	255575	16747.7	16747.7	16747.7	152304	16747.7	587891	873038	16747.7	114139
188	Pigr	13	13	13	20.2	20.2	20.2	84.998	0	112.8	1290000000	238	37823000	O70570	O70570	Polymeric immunoglobulin receptor;Secretory component	132824	157922	510182	16747.7	255321	520556	617906	1.11188e+06	87888	720446	519452	1.34436e+06	2.26442e+06	670133	657664	583631	548247	487583	555849	182755	466630	291956	367813	748139	352168	80287.9	99713.6	80102.9	300448	394746	2.82276e+06	377901	601060
189	Clec11a	13	13	13	39.3	39.3	39.3	36.451	0	47.944	2011400000	372	125710000	O88200	O88200	C-type lectin domain family 11 member A	1.95835e+06	2.93357e+06	3.44028e+06	1.64615e+06	1.08333e+06	1.27035e+06	1.40995e+06	3.07419e+06	2.09952e+06	3.21035e+06	2.64715e+06	4.44362e+06	4.16953e+06	2.36304e+06	2.51834e+06	2.25678e+06	2.08686e+06	1.47805e+06	3.45016e+06	227641	1.01961e+06	2.03765e+06	1.1772e+06	727102	1.14689e+06	790413	701691	202092	323856	1.22881e+06	1.24366e+06	2.05593e+06	1.386e+06
190	Wdr1	5	5	5	15.2	15.2	15.2	66.406	0.0023419	7.0218	44666000	12	1488900	Q3TJY2;O88342;A0A0J9YU05	Q3TJY2;O88342	WD repeat-containing protein 1	16747.7	16747.7	16747.7	16747.7	16747.7	16747.7	16747.7	16747.7	16747.7	129254	16747.7	16747.7	146644	16747.7	16747.7	16747.7	120805	16747.7	16747.7	16747.7	133375	368703	150453	448447	16747.7	16747.7	16747.7	16747.7	16747.7	16747.7	16747.7	16747.7	16747.7
191	F5	47	47	47	25.7	25.7	25.7	247.23	0	323.31	5949700000	908	62628000	O88783	O88783	Coagulation factor V;Coagulation factor V heavy chain;Coagulation factor V light chain	1.65655e+06	1.79552e+06	1.61743e+06	1.45824e+06	1.81214e+06	2.3678e+06	1.06895e+06	1.44725e+06	1.13957e+06	1.3303e+06	1.22881e+06	1.47459e+06	1.82692e+06	1.13812e+06	1.70187e+06	909816	362767	345419	964306	661158	497236	798639	688002	1.70048e+06	866021	532722	799858	377285	277251	953804	384396	626699	637839
192	F10	23	23	23	42.4	42.4	42.4	54.017	0	323.31	63900000000	1487	2905400000	Q3TBR2;Q3U3V1;O88947;D3Z521;D3Z215	Q3TBR2;Q3U3V1;O88947	Coagulation factor X;Factor X light chain;Factor X heavy chain;Activated factor Xa heavy chain	4.95773e+07	4.82405e+07	5.73958e+07	5.28155e+07	3.70395e+07	3.78914e+07	5.35172e+07	4.30899e+07	3.15775e+07	5.08221e+07	4.73424e+07	3.91883e+07	4.63522e+07	5.11896e+07	4.42917e+07	4.32038e+07	4.20583e+07	4.40369e+07	3.6302e+07	3.1235e+07	5.1882e+07	4.44916e+07	5.67377e+07	5.00515e+07	3.83206e+07	2.97443e+07	3.515e+07	3.46546e+07	3.0268e+07	2.19723e+07	2.4523e+07	29171955	3.34921e+07
193	Afm	56	56	56	76.8	76.8	76.8	69.378	0	323.31	335000000000	5966	9565600000	O89020	O89020	Afamin	1.77196e+08	1.82677e+08	1.92447e+08	1.72883e+08	1.20481e+08	9.74143e+07	1.67816e+08	1.83839e+08	1.65855e+08	2.01411e+08	1.47519e+08	1.59577e+08	2.08911e+08	1.73355e+08	1.53244e+08	1.37098e+08	2.04293e+08	1.50134e+08	1.33658e+08	1.37646e+08	1.51142e+08	1.54785e+08	1.47583e+08	1.50995e+08	1.34598e+08	1.27667e+08	1.18531e+08	1.49724e+08	1.27279e+08	9.76619e+07	1.15461e+08	1.18741e+08	1.25494e+08
194	Cd93	3	3	3	6.2	6.2	6.2	69.354	0.0021882	5.1853	39475000	7	1879800	O89103	O89103	Complement component C1q receptor	16747.7	102593	253632	91517.4	102108	16747.7	16747.7	16747.7	16747.7	16747.7	16747.7	16747.7	214209	16747.7	197381	16747.7	16747.7	16747.7	16747.7	16747.7	16747.7	16747.7	16747.7	16747.7	16747.7	16747.7	16747.7	16747.7	16747.7	16747.7	170786	16747.7	16747.7
195	Amy1	22	22	15	50.7	50.7	36.8	57.643	0	252.41	6521700000	772	260870000	P00687;D3YYQ5;G3UXY7	P00687;D3YYQ5	Alpha-amylase 1;Alpha-amylase	2.73984e+06	4.61872e+06	4.25058e+06	2.40983e+06	2.43293e+06	1.09506e+06	3.5634e+06	3.52427e+06	2.75891e+06	5.07086e+06	5.28249e+06	3.93e+06	6.47492e+06	3.66793e+06	4.68238e+06	2.42335e+06	3.05044e+06	2.96064e+06	6.03362e+06	2.96101e+06	6.02962e+06	3.40218e+06	4.77603e+06	5.59724e+06	3.53728e+06	1.28824e+06	1.95937e+06	1.65568e+06	1.51422e+06	2.10575e+06	1.18899e+06	2.31794e+06	1.82239e+06
196	Amy2;Amy2a1	15	8	8	37.6	23.6	23.6	57.318	0	79.416	633330000	90	25333000	P00688;E9PV85	P00688;E9PV85	Pancreatic alpha-amylase;Alpha-amylase	963914	871077	2.68749e+06	809512	182331	16747.7	241580	338168	590221	239712	331630	656654	672374	225992	739866	16747.7	16747.7	16747.7	231569	175062	186415	281951	246194	88459.9	16747.7	16747.7	16747.7	16747.7	16747.7	16747.7	16747.7	149502	16747.7
197	Ca2	12	12	12	58.1	58.1	58.1	29.032	0	162.04	4064300000	260	312640000	P00920;A0A0A6YX78	P00920	Carbonic anhydrase 2	9.39677e+06	5.70179e+06	6.00954e+06	6.57371e+06	4.54126e+06	2.13195e+06	7.23853e+06	4.34106e+06	2.38297e+06	7.0819e+06	9.01786e+06	3.72851e+06	1.1948e+07	7.0953e+06	6.62843e+06	2.73171e+06	1.18467e+06	2.89592e+06	277251	2.58356e+06	3.78807e+06	2.75668e+06	779488	576047	4.90623e+06	497736	2.38236e+06	6.11836e+06	1.32541e+06	1.49218e+06	2.27146e+06	1.62459e+06	2.33485e+06
198	C3	221	221	221	92.2	92.2	92.2	186.48	0	323.31	4200000000000	32212	40400000000	P01027;H3BL60;H3BKW9	P01027	Complement C3;Complement C3 beta chain;C3-beta-c;Complement C3 alpha chain;C3a anaphylatoxin;Acylation stimulating protein;Complement C3b alpha chain;Complement C3c alpha chain fragment 1;Complement C3dg fragment;Complement C3g fragment;Complement C3d fragment;Complement C3f fragment;Complement C3c alpha chain fragment 2	4.11957e+08	316242864	441944532	3.49202e+08	2.72977e+08	3.09951e+08	3.77431e+08	4.46098e+08	3.71836e+08	3.8004e+08	5.35641e+08	3.55757e+08	5.41288e+08	4.23337e+08	4.24823e+08	4.61284e+08	4.04934e+08	3.45117e+08	3.22889e+08	5.46736e+08	4.65166e+08	4.33696e+08	5.19857e+08	4.25433e+08	4.00182e+08	4.06778e+08	4.46364e+08	3.74333e+08	3.85257e+08	5.35641e+08	466385553	4.33441e+08	5.61048e+08
199	C4b	111	111	110	66.5	66.5	66.5	192.91	0	323.31	347000000000	9676	4510300000	P01029;G3UZS2	P01029	Complement C4-B;Complement C4 beta chain;Complement C4 alpha chain;C4a anaphylatoxin;Complement C4 gamma chain	5.71493e+07	5.16133e+07	62604494	5.41632e+07	5.22999e+07	5.30504e+07	5.07652e+07	4.56979e+07	4.58891e+07	3.43192e+07	7.70917e+07	4.12672e+07	5.18066e+07	4.55256e+07	5.78259e+07	6.50104e+07	3.23204e+07	3.54718e+07	4.77367e+07	4.66606e+07	4.01031e+07	3.62221e+07	6.74071e+07	5.14912e+07	5.2391e+07	4.58891e+07	5.45796e+07	5.56934e+07	4.32889e+07	8.45993e+07	4.08085e+07	5.40041e+07	6.14648e+07
200	Igj	8	8	8	39	39	39	18.013	0	52.322	10800000000	614	1350200000	P01592;E9PWK4	P01592;E9PWK4	Immunoglobulin J chain	3.48746e+07	1.86248e+07	2.14717e+07	2.76491e+07	4.43951e+07	3.68043e+07	2.67548e+07	2.90314e+07	2.28748e+07	4.93617e+07	1.88576e+07	2.48001e+07	2.4723e+07	2.07886e+07	1.98546e+07	2.13742e+07	3.15815e+07	3.01665e+07	1.7852e+07	2.55726e+07	2.8942e+07	2.63561e+07	9.68893e+06	2.16894e+07	2.95716e+07	1.14832e+07	2.02505e+07	1.38633e+07	2.70257e+07	1.29105e+07	6.37078e+07	29732151	4.60747e+07
201	Igkv1-110;Igkv1-99;Igkv1-115	6	6	6	42.5	42.5	42.5	12.273	0	158.74	16100000000	363	3210400000	P01631;A0A0B4J1I0;A0A075B5K8;F6XWB2;A0A075B5N0;A0A0G2JDE5	P01631;A0A0B4J1I0;A0A075B5K8;F6XWB2	Ig kappa chain V-II region 26-10	1.97429e+07	1.25273e+07	3.91007e+07	3.54622e+07	1.38799e+07	7.46095e+06	4.63825e+07	2.51544e+07	3.23841e+07	6.30462e+07	3.80722e+07	6.20392e+07	6.08104e+07	2.56715e+07	1.25407e+07	2.7769e+07	7.4945e+07	1.05179e+07	3.32966e+07	4.52696e+07	3.53024e+07	5.13024e+07	3.70633e+07	3.53485e+07	4.51637e+07	8.15278e+07	3.81341e+07	4.34144e+07	5.59842e+07	4.00674e+07	9.14836e+07	7.24361e+07	7.53741e+07
202	P01635	5	5	5	43.5	43.5	43.5	12.581	0	108.47	7662300000	226	1094600000	P01635	P01635	Ig kappa chain V-V region K2	2.44886e+07	5.11863e+06	1.61202e+07	9.43541e+06	9.86932e+06	7.00097e+06	1.24879e+07	1.01661e+07	1.56064e+07	1.16225e+07	7.02658e+06	2.12988e+07	1.84286e+07	1.15412e+07	1.38328e+07	4.60933e+06	2.70092e+07	6.07597e+06	1.74676e+07	1.21056e+07	1.59437e+07	2.03149e+07	1.52003e+07	1.93711e+07	1.10409e+07	1.52819e+07	2.06429e+07	2.57015e+07	1.82682e+07	1.81894e+07	1.46493e+07	2.3826e+07	1.66663e+07
203	P01636	2	2	2	25.9	25.9	25.9	12.03	0	46.664	1375200000	102	229200000	P01636	P01636	Ig kappa chain V-V region MOPC 149	3.60396e+06	2.41778e+06	2.33548e+06	5.82314e+06	16747.7	5.10019e+06	2.27307e+06	16747.7	16747.7	6.68469e+06	8.05989e+06	3.66359e+06	1.75743e+06	2.89592e+06	16747.7	16747.7	16747.7	16747.7	16747.7	1.67638e+06	898313	4.84107e+06	16747.7	16747.7	2.11649e+06	7.965e+06	5.28777e+06	5.7314e+06	5.76874e+06	6.27628e+06	6.51993e+06	1.11453e+07	7.6023e+06
204	P01638	5	5	3	38.3	38.3	18.3	12.986	0	129.15	16400000000	507	4096300000	P01638	P01638	Ig kappa chain V-V region L6	6.76915e+07	1.6254e+07	5.38534e+07	104558871	4.89797e+07	3.48717e+07	4.03681e+07	3.28952e+07	1.67019e+07	6.85725e+07	4.22643e+07	8.49887e+07	5.9402e+07	9.92681e+07	2.36934e+07	4.07142e+07	7.99539e+07	1.77052e+07	2.83301e+07	4.96149e+07	4.23282e+07	3.18986e+07	2.76663e+07	4.11074e+07	5.09538e+07	7.12117e+07	6.80385e+07	6.49285e+07	5.26393e+07	6.63018e+07	5.85839e+07	5.26965e+07	4.23282e+07
205	Gm5571	4	4	4	28.5	28.5	28.5	14.311	0	90.507	3724300000	181	931080000	P01639	P01639	Ig kappa chain V-V region MOPC 41	2.34422e+07	7.93522e+06	1.10863e+07	1.56141e+07	2.34693e+07	2.25868e+07	1.4585e+07	2.2177e+07	9.86351e+06	3.17645e+07	1.25663e+07	1.18292e+07	6.35075e+06	2.83549e+07	3.38838e+07	1.6506e+07	1.86102e+07	2.12637e+07	4.42061e+06	2.83473e+07	1.02368e+07	1.2061e+07	1.28297e+07	3.37351e+06	9.98339e+06	715200	1.10625e+07	9.95873e+06	9.96735e+06	1.68404e+07	1.37842e+07	5.16191e+06	1.30307e+07
206	Gm10881	2	2	2	23.5	23.5	23.5	12.615	0	181.61	6396400000	249	1599100000	P01642	P01642	Ig kappa chain V-V region L7	2.21217e+07	3.24108e+06	2.10713e+07	2.54774e+07	1.07731e+07	1.18064e+07	2.07886e+07	2.46484e+07	3.73173e+07	2.30187e+07	2.57145e+07	3.38946e+07	2.75788e+07	3.7831e+07	2.06508e+07	5.20963e+06	1.89571e+07	1.02838e+07	1.26155e+07	2.46077e+07	1.36483e+07	1.64469e+07	1.85933e+07	1.79771e+07	2.10636e+07	1.59201e+07	1.36376e+07	1.31911e+07	2.76719e+07	1.74801e+07	3.65972e+07	4.68451e+07	1.87267e+07
207	P01645;P01644;P01646;P01648	7	7	1	67.6	67.6	19.4	11.954	0	271.82	27200000000	586	5440700000	P01645;P01644;P01646;P01648;P01643;P01649;P04946	P01645;P01644;P01646;P01648	Ig kappa chain V-V region HP 93G7;Ig kappa chain V-V region HP R16.7;Ig kappa chain V-V region HP 123E6;Ig kappa chain V-V region HP 91A3	7.39072e+07	3.45476e+07	6.08964e+07	7.10144e+07	5.55405e+07	4.99004e+07	6.35301e+07	7.59721e+07	5.36311e+07	6.64445e+07	1.17896e+08	138119537	7.54895e+07	6.75438e+07	4.30137e+07	3.23258e+07	6.28575e+07	2.55837e+07	4.07626e+07	9.88047e+07	5.99922e+07	1.10188e+08	61835451	6.99071e+07	8.16626e+07	1.02809e+08	7.74333e+07	8.19841e+07	1.15718e+08	1.1353e+08	1.53486e+08	1.1415e+08	8.55404e+07
208	Igkv3-2	6	6	3	94.6	94.6	36	11.98	0	323.31	11900000000	556	2972900000	P01654;P01656;P01655;A0A075B5P0	P01654;P01656;P01655;A0A075B5P0	Ig kappa chain V-III region PC 2880/PC 1229;Ig kappa chain V-III region MOPC 70;Ig kappa chain V-III region PC 7132	3.57502e+07	2.90754e+07	1.48752e+07	3.73173e+07	6.51003e+07	6.20069e+07	3.37285e+07	6.92795e+07	4.89572e+07	5.47855e+07	3.2616e+07	2.8274e+07	2.42321e+07	3.11425e+07	2.31848e+07	2.54532e+07	7.74171e+07	1.46838e+07	20377287	5.55667e+07	3.34921e+07	4.10606e+07	2.88668e+07	5.57721e+07	4.26656e+07	3.63277e+07	2.19337e+07	1.18757e+07	3.84204e+07	7.70917e+07	3.47536e+07	9.43772e+07	2.46883e+07
209	P01660	4	3	1	48.6	32.4	9.9	12.099	0	80.45	3864800000	193	966200000	P01660;P01659	P01660	Ig kappa chain V-III region PC 3741/TEPC 111	2.05309e+07	4.09506e+06	1.75604e+07	2.44822e+07	2.2938e+07	1.99303e+07	1.40404e+07	1.82059e+07	6.31298e+06	1.52685e+07	2.84426e+07	1.76982e+07	1.49955e+07	5.90656e+07	6.89663e+06	1.2856e+07	1.40951e+07	1.40292e+07	1.29977e+07	3.36407e+07	1.30307e+07	1.52271e+07	5.67489e+06	3.44588e+06	1.90749e+07	1.97888e+07	2.10823e+07	2.12293e+07	9.50019e+06	3.01472e+07	1.00171e+07	1.95946e+07	3.00793e+07
210	Igkv3-10	4	1	1	53.2	16.2	16.2	12.005	0	14.893	537840000	8	134460000	P01663;P01662;A0A075B5N8;A0A0G2JGN0;P01661	P01663;P01662;A0A075B5N8;A0A0G2JGN0;P01661	Ig kappa chain V-III region PC 4050;Ig kappa chain V-III region ABPC 22/PC 9245;Ig kappa chain V-III region MOPC 63	2.78283e+06	16747.7	2.89592e+06	16747.7	6.7792e+06	1.24045e+07	4.92155e+06	2.70489e+06	16747.7	2.28851e+06	1.78182e+07	9.16304e+06	4.0348e+06	1.85468e+07	16747.7	16747.7	2.78694e+06	16747.7	16747.7	3.17544e+06	16747.7	1.51899e+06	754651	16747.7	16747.7	16747.7	2.10178e+06	5.38896e+06	1.01529e+06	16747.7	16747.7	4.14673e+06	15055239
211	P01666;P01665;P01668;P01669;P01667	3	2	1	53.2	36.9	22.5	11.952	0	117.41	3329800000	157	1109900000	P01666;P01665;P01668;P01669;P01667	P01666;P01665;P01668;P01669;P01667	Ig kappa chain V-III region PC 7183;Ig kappa chain V-III region PC 7043;Ig kappa chain V-III region PC 7210;Ig kappa chain V-III region PC 7769;Ig kappa chain V-III region PC 6308	5.79442e+06	3.61443e+06	1.53946e+06	1.16628e+07	4.17046e+07	4.82405e+07	1.14216e+07	1.54244e+07	5.52617e+07	2.95943e+07	5.91395e+06	3.30269e+07	6.682e+06	5.43821e+06	1.86943e+07	1.214e+07	130302060	4.4734e+06	16747.7	1.42492e+07	8.481e+06	8.01898e+06	3.05822e+06	1.0962e+07	1.66276e+07	7.45418e+06	4.51876e+06	3.4818e+06	4.67837e+06	5.78965e+07	1.69852e+07	2.43641e+07	6.02962e+06
212	P01671;P01673	6	5	2	91.9	75.7	13.5	12.01	0	224.32	2475600000	176	618910000	P01671;P01673	P01671;P01673	Ig kappa chain V-III region PC 7175;Ig kappa chain V-III region PC 2485/PC 4039	1.08341e+07	16747.7	4.57413e+06	3.33742e+06	7.24601e+06	6.18525e+06	5.63351e+06	1.05763e+07	3.87275e+06	1.7793e+07	1.64657e+07	4.98159e+06	1.2478e+07	4.08488e+07	2.61972e+06	16747.7	5.96673e+06	2.17351e+06	3.90378e+06	5.61184e+06	3.08675e+06	1.7769e+07	4.94537e+06	6.88243e+06	3.27527e+07	3.58195e+06	6.77064e+06	1.0168e+07	5.19377e+06	1.5798e+07	4.99948e+06	1.74293e+07	2.22812e+07
213	Igkv4-86	4	3	3	56.1	48.6	48.6	11.554	0	24.254	466200000	80	116550000	P01678;P01677;P01676;P01675;A0A075B5L5;A0A0G2JGE7;P01679	P01678;P01677;P01676;P01675;A0A075B5L5;A0A0G2JGE7;P01679	Ig kappa chain V-VI region SAPC 10;Ig kappa chain V-VI region TEPC 601/TEPC 191;Ig kappa chain V-VI region XRPC 24;Ig kappa chain V-VI region XRPC 44;Ig kappa chain V-VI region J539	2.18426e+06	16747.7	16747.7	16747.7	16747.7	16747.7	16747.7	805272	16747.7	16747.7	16747.7	16747.7	3.09815e+06	1.00654e+06	16747.7	1.63259e+06	16747.7	16747.7	16747.7	16747.7	16747.7	4.67891e+06	871530	957002	16747.7	16747.7	845902	3.07769e+06	639064	880423	6.00605e+06	1.31091e+06	4.70933e+06
214	P01725	1	1	1	20.9	20.9	20.9	11.654	0.0020661	4.1271	427480000	39	61068000	P01725	P01725	Ig lambda-1 chain V region S178	2.94311e+06	16747.7	16747.7	1.32033e+06	5.12811e+06	1.12498e+06	3.82522e+06	4.10381e+06	2.4297e+06	16747.7	1.84972e+06	1.50769e+06	2.23162e+06	1.42499e+06	16747.7	16747.7	16747.7	16747.7	16747.7	16747.7	16747.7	16747.7	2.03886e+06	16747.7	16747.7	1.62701e+06	726459	1.07437e+06	1.59548e+06	1.70558e+06	1.67661e+06	1.24398e+06	2.16642e+06
215	Ighv1-61	7	2	2	62.4	34.2	34.2	13.016	0	45.007	1360000000	97	341010000	P01749	P01749	Ig heavy chain V region 3	5.17821e+06	16747.7	16747.7	578076	16747.7	16747.7	4.67163e+06	16747.7	2.97443e+07	5.36537e+06	810286	16747.7	1.18923e+06	1.38716e+07	16747.7	2.16608e+06	1.05497e+07	16747.7	16747.7	6.57371e+06	435643	4.92081e+06	16747.7	16747.7	5.84056e+06	6.57371e+06	16747.7	16747.7	5.07086e+06	6.16333e+06	6.13736e+06	16747.7	3.25568e+07
216	P01799;P01797;P01796;P01801;P01800;P01798;P01802	3	1	1	26.5	16.8	16.8	12.675	0.0021322	4.7546	231090000	27	38515000	P01799;P01797;P01796;P01801;P01800;P01798;P01802	P01799;P01797;P01796;P01801;P01800;P01798;P01802	Ig heavy chain V-III region ABE-47N;Ig heavy chain V-III region U61;Ig heavy chain V-III region A4;Ig heavy chain V-III region J606;Ig heavy chain V-III region T957;Ig heavy chain V-III region E109;Ig heavy chain V-III region W3082	1.19202e+06	691649	1.09667e+06	1.22088e+06	623280	16747.7	16747.7	16747.7	16747.7	16747.7	16747.7	16747.7	16747.7	16747.7	16747.7	808361	1.10901e+06	1.24256e+06	1.21864e+06	16747.7	16747.7	1.20508e+06	1.60769e+06	16747.7	16747.7	16747.7	16747.7	16747.7	16747.7	16747.7	3.349e+06	1.92756e+06	1.74756e+06
217	Igkc	16	16	16	100	100	100	11.778	0	323.31	126000000000	1788	31600000000	P01837;A0A075B5P2	P01837;A0A075B5P2	Ig kappa chain C region	5.00214e+08	1.45854e+08	1.08348e+08	3.22889e+08	2.38026e+08	2.66239e+08	3.48212e+08	5.73393e+08	2.3597e+08	410884446	3.28712e+08	4.99571e+08	2.62625e+08	451432625	1.78186e+08	1.09351e+08	4.35563e+08	168497705	2.96622e+08	1298351148	2.05269e+08	320992762	2.71026e+08	5.12583e+08	7.50887e+08	6.68824e+08	1.89014e+08	5.06282e+08	2.56499e+08	7.64054e+08	1151708244	3.41711e+08	9.18697e+08
218	Iglc2	7	2	2	92.4	32.4	32.4	11.311	0	198.77	1061300000	54	176880000	Q99JC1;P01844	Q99JC1;P01844	Ig lambda-2 chain C region	4.24857e+06	2.26855e+06	1.72815e+06	4.29858e+06	16747.7	16747.7	16747.7	3.12247e+06	16747.7	16747.7	4.56766e+06	16747.7	16747.7	16747.7	16747.7	16747.7	16747.7	16747.7	16747.7	16747.7	16747.7	16747.7	16747.7	2.18718e+06	16747.7	16747.7	16747.7	16747.7	7.31763e+06	8.24714e+06	6.76399e+06	814240	16747.7
219	Ighg1	19	2	2	58.6	9.9	9.9	35.704	0.0022883	6.4721	70777000	12	5055500	P01868;P01869	P01868;P01869	Ig gamma-1 chain C region secreted form;Ig gamma-1 chain C region, membrane-bound form	16747.7	16747.7	16747.7	16747.7	16747.7	16747.7	16747.7	16747.7	16747.7	16747.7	16747.7	16747.7	16747.7	16747.7	16747.7	16747.7	16747.7	16747.7	16747.7	16747.7	16747.7	16747.7	16747.7	16747.7	890134	2.0009e+06	16747.7	16747.7	242789	16747.7	16747.7	16747.7	16747.7
220	B2m	7	7	7	73.1	73.1	73.1	13.779	0	323.31	19100000000	466	2728700000	P01887	P01887	Beta-2-microglobulin	3.95393e+07	6.06544e+07	5.5494e+07	4.98075e+07	7.44479e+07	8.32768e+07	5.6786e+07	5.01525e+07	2.91392e+07	3.60191e+07	5.96806e+07	5.3996e+07	4.76776e+07	6.05704e+07	4.69896e+07	3.53428e+07	5.15747e+07	3.22659e+07	2.48264e+07	1.48527e+07	4.74885e+07	4.83857e+07	3.34458e+07	3.70711e+07	3.07584e+07	4.18725e+07	2.50241e+07	2.62055e+07	1.74676e+07	3.53257e+07	1.91502e+07	2.62757e+07	3.11878e+07
221	H2-Q10	29	29	21	63.4	63.4	54.8	37.251	0	323.31	230000000000	3545	12100000000	P01898;A7VMS6;E9Q0G4;G3UXE9;V9GXI4;A0A0B4J1G3;G3UZL7;V9GXR0;P01896	P01898	H-2 class I histocompatibility antigen, Q10 alpha chain	1.32558e+08	1.09294e+08	1.5562e+08	1.41076e+08	1.06047e+08	1.06195e+08	196690600	123599801	1.40893e+08	1.65227e+08	2.09261e+08	1.93858e+08	2.20095e+08	240512438	1.61625e+08	1.18708e+08	1.5026e+08	8.85516e+07	1.15718e+08	1.02752e+08	1.31056e+08	1.78419e+08	1.80445e+08	1.66495e+08	1.64437e+08	1.48763e+08	136355470	1.58462e+08	1.40794e+08	1.23046e+08	1.62049e+08	1.65289e+08	1.43911e+08
222	Cfd	12	12	12	49.4	49.4	49.4	28.057	0	323.31	200000000000	2055	18200000000	P03953	P03953	Complement factor D	2.80471e+08	234757257	2.43084e+08	2.60411e+08	4.18337e+08	2.85603e+08	2.7892e+08	2.79241e+08	2.52298e+08	3.26649e+08	2.66549e+08	254370795	4.27996e+08	1.82677e+08	2.86231e+08	2.13451e+08	243916094	2.31654e+08	2.39638e+08	2.19855e+08	2.97321e+08	2.98125e+08	155327812	2.56697e+08	225720101	2.19669e+08	1.68579e+08	1.75582e+08	1.98352e+08	1.79408e+08	2.40104e+08	2.42482e+08	2.60707e+08
223	Mb	4	4	4	29.2	29.2	29.2	17.069	0	11.289	185230000	66	26461000	Q3UVB1;P04247	Q3UVB1;P04247	Myoglobin	371605	16747.7	16747.7	16747.7	16747.7	16747.7	16747.7	16747.7	16747.7	16747.7	551714	16747.7	16747.7	16747.7	16747.7	16747.7	16747.7	16747.7	16747.7	16747.7	16747.7	16747.7	287678	375053	16747.7	16747.7	16747.7	647829	16747.7	16747.7	16747.7	285679	273039
224	Aldoa	21	21	20	55.2	55.2	53.3	39.355	0	143.24	2920000000	455	126910000	Q5FWB7;P05064;A6ZI44;D3YWI1;D3Z510;D3YV98;A6ZI47;Q9CPQ9;A6ZI46;P05063	Q5FWB7;P05064;A6ZI44;D3YWI1;D3Z510;D3YV98	Fructose-bisphosphate aldolase;Fructose-bisphosphate aldolase A	1.72532e+06	629770	964714	618546	1.89788e+06	1.76817e+06	1.09615e+06	3.66131e+06	2.33633e+06	4.73197e+06	3.88263e+06	3.33889e+06	4.92013e+06	3.10139e+06	1.59088e+06	1.28872e+06	3.10313e+06	884244	1.07639e+06	3.30128e+06	2.51441e+06	2.08128e+06	2.39331e+06	4.99249e+06	1.597e+06	1.66618e+06	925567	1.13306e+06	1.04501e+06	608512	1.02329e+06	1.40222e+06	1.26064e+06
225	Cela2a	4	4	4	22.5	22.5	22.5	28.913	0	51.709	367680000	56	30640000	P05208	P05208	Chymotrypsin-like elastase family member 2A	797810	586654	16747.7	16747.7	16747.7	16747.7	16747.7	16747.7	16747.7	186218	16747.7	16747.7	16747.7	512073	1.02891e+06	16747.7	16747.7	16747.7	16747.7	16747.7	16747.7	16747.7	993636	16747.7	457120	378971	413067	391938	219580	279749	356362	339142	411440
226	Tuba1a;Tuba1b;Tuba1c;Tuba3a;Tuba4a;Tuba8	4	4	4	15.7	15.7	15.7	50.135	0	11.927	40575000	6	1932100	P68369;P05213;Q52L87;Q5FW91;A0A0A0MQA5;P68368;P68373;P05214;Q9JJZ2	P68369;P05213;Q52L87;Q5FW91;A0A0A0MQA5;P68368;P68373;P05214;Q9JJZ2	Tubulin alpha-1A chain;Tubulin alpha-1B chain;Tubulin alpha-4A chain;Tubulin alpha-1C chain;Tubulin alpha-3 chain;Tubulin alpha-8 chain	16747.7	16747.7	16747.7	16747.7	16747.7	16747.7	16747.7	16747.7	16747.7	16747.7	16747.7	16747.7	16747.7	16747.7	16747.7	16747.7	16747.7	16747.7	16747.7	16747.7	16747.7	130089	16747.7	16747.7	16747.7	16747.7	16747.7	16747.7	16747.7	16747.7	16747.7	16747.7	16747.7
227	Saa1	13	13	10	67.2	67.2	52.5	13.77	0	268.46	10900000000	465	2172100000	Q5I0U6;P05366;P04918	Q5I0U6;P05366	Serum amyloid A protein;Serum amyloid A-1 protein	461879	384248	177593	16747.7	1.44741e+07	1.60007e+07	16747.7	2.53814e+06	16747.7	6.1138e+06	2.28191e+07	1.7383e+07	1.77464e+07	1.0645e+07	1.83593e+07	2.09382e+07	1.55455e+07	2.61233e+07	3.53171e+07	3.93263e+07	5.82605e+07	9.49791e+07	4.01396e+07	115797579	16747.7	16747.7	16747.7	16747.7	16747.7	3.44478e+07	1.21358e+06	2.96832e+06	16747.7
228	Saa2	12	9	9	68.9	54.1	54.1	13.622	0	61.257	2285900000	193	457190000	P05367	P05367	Serum amyloid A-2 protein;Amyloid protein A	16747.7	16747.7	16747.7	16747.7	16747.7	16747.7	16747.7	555849	16747.7	16747.7	1.26054e+06	1.05099e+06	16747.7	730844	3.27808e+06	1.35296e+07	452595	8.6674e+06	1.6301e+07	2.60374e+07	4.60747e+07	3.80564e+07	6.89453e+06	3.02102e+07	16747.7	16747.7	16747.7	16747.7	16747.7	1.29328e+06	16747.7	391527	16747.7
229	P06330	9	9	3	73.7	73.7	16.1	12.934	0	323.31	46300000000	697	6615600000	P06330;P01757;P01756	P06330	Ig heavy chain V region AC38 205.12	9.31275e+07	4.37076e+07	4.64703e+07	9.65261e+07	6.32238e+07	5.64728e+07	1.37811e+08	4.43951e+07	8.74837e+07	1.91706e+08	5.78965e+07	1.09158e+08	7.14015e+07	1.15236e+08	4.99563e+07	2.37921e+07	1.74118e+08	3.87581e+07	6.55141e+07	1.68343e+08	115307557	1.02086e+08	9.68226e+07	1.43933e+08	1.13567e+08	7.60209e+07	8.28486e+07	5.96503e+07	6.55141e+07	1.05543e+08	1.69782e+08	1.24047e+08	1.51142e+08
230	C9	50	50	50	75.7	75.7	75.7	62.002	0	323.31	80800000000	2287	2606500000	P06683;H3BKN4	P06683	Complement component C9	5.24888e+07	4.66704e+07	3.52291e+07	4.53781e+07	29417722	3.19089e+07	3.83095e+07	3.38401e+07	3.10171e+07	5.21863e+07	5.43716e+07	4.02186e+07	3.5224e+07	3.51276e+07	5.96711e+07	5.08401e+07	2.54884e+07	4.71636e+07	3.95357e+07	1.3716e+07	5.04345e+07	3.53707e+07	4.35726e+07	3.26739e+07	4.04077e+07	2.06414e+07	3.7049e+07	2.8709e+07	2.30944e+07	3.12279e+07	2.25023e+07	3.57319e+07	3.61838e+07
231	C5	77	77	77	51	51	51	188.88	0	323.31	31200000000	2497	380920000	P06684;A0A0J9YUU3	P06684	Complement C5;Complement C5 beta chain;Complement C5 alpha chain;C5a anaphylatoxin;Complement C5 alpha chain	3.7372e+06	4.89843e+06	2.62673e+06	3.90378e+06	7.39919e+06	5.32316e+06	2.75513e+06	1.98756e+06	2.64546e+06	2.99973e+06	3.96473e+06	3.1094e+06	2.51607e+06	2.10776e+06	3.0438e+06	4.01674e+06	1.86925e+06	3.44562e+06	1.51422e+06	2.35072e+06	2.87128e+06	2.28827e+06	4.3723e+06	3.03012e+06	3.80287e+06	1.50769e+06	3.56668e+06	4.16497e+06	1.88268e+06	3.88263e+06	1.86618e+06	6.02637e+06	5.0597e+06
232	Apoa4	62	62	62	87.8	87.8	87.8	45.029	0	323.31	995000000000	9196	41500000000	P06728	P06728	Apolipoprotein A-IV	5.31664e+08	4.78451e+08	4.70668e+08	4.72789e+08	3.82448e+08	3.36159e+08	5.62817e+08	5.40306e+08	4.3977e+08	4.95503e+08	4.45853e+08	589341246	5.98348e+08	5.73214e+08	4.83201e+08	3.9631e+08	5.88698e+08	3.79491e+08	4.53009e+08	4.51913e+08	3.46058e+08	4.89313e+08	4.87321e+08	3.6396e+08	5.85456e+08	635784531	5.79205e+08	6.70588e+08	6.22105e+08	4.45853e+08	625748671	6.15356e+08	4.95967e+08
233	Ttr	15	15	15	73.5	73.5	73.5	15.776	0	323.31	145000000000	1755	20700000000	Q5M9K1;P07309	Q5M9K1;P07309	Transthyretin	3.01319e+08	2.90473e+08	2.76008e+08	2.98407e+08	3.20688e+08	5.33996e+08	4.3977e+08	3.00521e+08	3.14336e+08	3.04014e+08	3.05354e+08	3.84842e+08	3.68961e+08	3.61681e+08	4.53828e+08	2.45978e+08	4.93825e+08	2.67712e+08	2.74739e+08	306783348	4.07289e+08	4.60518e+08	3.12933e+08	3.36758e+08	2.41039e+08	2.07131e+08	1.77926e+08	1.86479e+08	2.74739e+08	2.21333e+08	200771980	2.74212e+08	320924841
234	Orm2	15	9	9	53.1	32.4	32.4	23.843	0	63.236	10800000000	449	979080000	P07361	P07361	Alpha-1-acid glycoprotein 2	986343	509150	1.1502e+06	763089	3.32342e+06	3.64038e+06	1.04031e+06	1.27772e+06	715200	806794	4.72657e+06	2.1439e+06	3.70085e+06	2.99945e+06	2.06786e+06	5.66209e+06	2.22603e+06	1.28127e+06	2.92655e+06	1.11166e+07	3.93814e+06	6.40922e+06	3.16518e+06	1.14082e+07	1.56012e+06	764776	4.17623e+06	348292	576485	5.43716e+07	3.49718e+06	5.90164e+06	2.24997e+06
235	Alb	131	131	131	95.1	95.1	95.1	68.692	0	323.31	25300000000000	81655	649000000000	Q546G4;P07724	Q546G4;P07724	Serum albumin	6615796530	9175597294	9175597294	9175597294	9175597294	9175597294	9175597294	6534743799	9175597294	9175597294	9175597294	9175597294	6744563962	9175597294	9175597294	9175597294	9175597294	9175597294	9175597294	9175597294	6602690989	9175597294	9175597294	9175597294	9175597294	9175597294	9175597294	9175597294	9175597294	6628747433	9175597294	9175597294	9175597294
236	Serpina3k	27	13	13	46.7	30.6	30.6	46.879	0	323.31	1590000000000	26476	79300000000	P07759;Q80X76;E9Q499	P07759	Serine protease inhibitor A3K	1324066700	1073854393	8.9445e+08	896562086	1550880078	1380306155	1078968364	1444338787	1110093082	1018214380	1329595839	1364747987	1143101756	1212414210	1059578795	1568786793	1315648835	8.06114e+08	1554509172	1172750056	1684245711	9.40801e+08	1463032365	1340460677	1184424016	1387418460	1397915400	1113418565	1554509172	1329595839	1036383796	1312809174	1318471542
237	Ltf	20	20	20	37.3	37.3	37.3	77.837	0	57.658	773990000	222	17200000	P08071;A0A0G2JDN0;A0A0G2JGN1;A0A0G2JFM6;A0A0G2JEA3;A0A0G2JGX1	P08071	Lactotransferrin	260768	73888.9	103424	77451.3	65687	225403	211684	711568	378971	210909	998922	886913	1.14295e+06	708298	764195	562946	741206	98674.9	905963	936658	1.1781e+06	1.05487e+06	946512	979436	504192	160883	345284	114197	16747.7	535359	39072.4	38371.2	164001
238	Col3a1	6	6	6	5.2	5.2	5.2	138.94	0	23.723	366150000	77	5306600	Q3TVI5;P08121;A0A087WPJ5	Q3TVI5;P08121;A0A087WPJ5	Collagen alpha-1(III) chain	155826	110304	274706	47380	16747.7	16747.7	53837.2	84956.5	135201	59950.1	138582	122389	120768	16747.7	76617.5	16747.7	16747.7	16747.7	101868	109199	16747.7	73815	16747.7	37824.4	16747.7	16747.7	16747.7	16747.7	16747.7	16747.7	320402	16747.7	16747.7
239	Apoe	44	44	44	78.1	78.1	78.1	35.866	0	323.31	564000000000	5734	37600000000	Q3TXU4;P08226;A0A0K0K186;G3UWN5;E9Q327;G3UZM8	Q3TXU4;P08226;A0A0K0K186;G3UWN5	Apolipoprotein E	7.17048e+08	7.27415e+08	6.94217e+08	5.38137e+08	5.55588e+08	6.32416e+08	5.919e+08	6.02896e+08	5.03992e+08	5.8627e+08	6.53928e+08	6.43838e+08	6.82426e+08	5.41848e+08	6.38526e+08	4.30526e+08	6.16872e+08	451432625	5.57881e+08	2.66453e+08	320924841	5.81598e+08	7.075e+08	4.53271e+08	4.31306e+08	5.73592e+08	4.1437e+08	4.42043e+08	4.20922e+08	3.84934e+08	3.72236e+08	461373050	4.37673e+08
240	C4bpa;C4bp	20	20	20	40.1	40.1	40.1	51.523	0	323.31	35000000000	1442	1519800000	P08607;E9PUZ8;F6QLW4	P08607;E9PUZ8	C4b-binding protein	1.58704e+07	2.03735e+07	2.23427e+07	1.66512e+07	2.02256e+07	2.12333e+07	1.71378e+07	1.33163e+07	1.27134e+07	7.34011e+06	1.85298e+07	1.46419e+07	1.2189e+07	1.75048e+07	1.58731e+07	1.18553e+07	8.77316e+06	6.95201e+06	1.19544e+07	6.96977e+06	1.13298e+07	8.39738e+06	1.42999e+07	1.1897e+07	1.26203e+07	9.86351e+06	1.36376e+07	1.86976e+07	1.29977e+07	1.78182e+07	1.43313e+07	1.81442e+07	1.44638e+07
241	Ace	28	28	28	29.3	29.3	29.3	150.92	0	149.91	2746400000	396	41612000	P09470;F6QCP8	P09470;F6QCP8	Angiotensin-converting enzyme;Angiotensin-converting enzyme, soluble form	384483	527575	352960	428505	16747.7	48668.7	313364	153377	302264	308297	279749	306292	535795	376565	357109	227331	295396	50377.9	173343	115798	179287	180863	128414	206546	536865	364484	321441	192681	109398	406330	587401	486455	497236
242	Csf1r	18	18	18	15.9	15.9	15.9	109.18	0	181.44	6273700000	552	190110000	Q0P635;P09581	Q0P635;P09581	Receptor protein-tyrosine kinase;Macrophage colony-stimulating factor 1 receptor	2.26174e+06	1.87834e+06	4.91446e+06	1.95884e+06	1.16965e+06	2.69087e+06	3.23492e+06	2.79972e+06	4.04206e+06	6.23047e+06	4.41797e+06	4.89843e+06	6.12525e+06	4.23621e+06	5.24912e+06	3.19152e+06	3.41245e+06	2.22565e+06	2.63442e+06	3.9319e+06	2.07249e+06	3.3365e+06	3.29119e+06	4.90598e+06	2.16474e+06	1.74334e+06	2.80398e+06	1.85068e+06	2.12784e+06	3.54975e+06	1.95577e+06	2.80429e+06	1.64157e+06
243	Cdh1	6	6	6	9.5	9.5	9.5	98.255	0	45.582	389260000	102	12164000	P09803	P09803	Cadherin-1;E-Cad/CTF1;E-Cad/CTF2;E-Cad/CTF3	16747.7	257304	461777	339446	312915	435366	133099	144412	72117.6	279004	89128	192212	242521	16747.7	601129	81040	423826	234960	189692	76782.2	212433	394560	443640	326672	121369	48518.1	64270.9	56550	89369.3	191642	97905.4	195029	16747.7
244	Apoa2	11	11	11	53.9	53.9	53.9	11.309	0	323.31	256000000000	1072	51200000000	P09813	P09813	Apolipoprotein A-II;Proapolipoprotein A-II	8.06447e+08	9.022e+08	6.60199e+08	6.01283e+08	1827513321	1908355193	804608474	1048124034	6.68824e+08	9.4609e+08	7.20432e+08	949566105	7.1489e+08	7.6954e+08	7.91422e+08	7.92063e+08	7.54691e+08	5.22849e+08	9.08966e+08	5.78717e+08	6.18378e+08	8.83872e+08	7.95247e+08	6.59921e+08	5.21855e+08	6.04673e+08	5.45392e+08	6.37453e+08	8.41571e+08	5.68062e+08	1.90055e+08	7.10721e+08	7.56586e+08
245	Ctsb	18	18	18	46.3	46.3	46.3	37.279	0	107.79	4538300000	500	238860000	P10605	P10605	Cathepsin B;Cathepsin B light chain;Cathepsin B heavy chain	2.83105e+06	1.58868e+06	3.36435e+06	1.79552e+06	3.00457e+06	4.02932e+06	3.98348e+06	2.91163e+06	1.50769e+06	2.08342e+06	6.16333e+06	5.27701e+06	7.60029e+06	3.60278e+06	5.14521e+06	1.9664e+06	3.68578e+06	1.96057e+06	3.74805e+06	1.25235e+06	1.94307e+06	1.8366e+06	4.06414e+06	4.43867e+06	3.14209e+06	1.78519e+06	1.4771e+06	2.31794e+06	2.07623e+06	3.34484e+06	1.75141e+06	3.77721e+06	3.13337e+06
246	Col1a1	14	14	14	13.9	13.9	13.9	138.03	0	323.31	11800000000	658	152600000	P11087	P11087	Collagen alpha-1(I) chain	1.47631e+06	1.24296e+06	1.76817e+06	787698	731917	799422	1.55586e+06	1.78433e+06	1.54516e+06	3.04844e+06	3.10726e+06	2.4297e+06	2.99999e+06	1.67596e+06	3.33997e+06	733351	1.30247e+06	433416	1.88268e+06	1.9493e+06	805908	2.33427e+06	632516	1.77265e+06	818469	1.16505e+06	601353	256345	378789	1.45726e+06	1.45029e+06	1.08765e+06	922935
247	Mup2	19	1	1	77.8	5	5	20.663	0.0019685	3.37	597120000	76	54284000	P11589	P11589	Major urinary protein 2	16747.7	16747.7	16747.7	16747.7	16747.7	16747.7	16747.7	16747.7	16747.7	16747.7	16747.7	16747.7	16747.7	16747.7	16747.7	16747.7	16747.7	16747.7	16747.7	16747.7	16747.7	16747.7	650739	16747.7	1.17102e+06	325250	16747.7	301179	16747.7	16747.7	16747.7	907502	221626
248	Apcs	14	14	14	59.8	59.8	59.8	26.247	0	311.95	18200000000	575	1516400000	Q4JFI8;P12246	Q4JFI8;P12246	Serum amyloid P-component	7.44395e+06	6.9352e+06	7.05221e+06	1.91659e+06	4.02522e+06	3.34121e+06	4.8392e+06	4.75036e+06	4.99462e+06	8.83935e+06	9.5926e+06	1.07077e+07	1.44434e+07	6.57371e+06	1.12132e+07	1.60977e+07	4.50982e+06	4.28439e+06	8.00412e+06	2.13338e+07	1.46205e+07	1.91468e+07	1.00933e+07	1.05245e+07	4.17763e+06	6.31298e+06	1.05691e+07	478817	1.80007e+06	5.60979e+07	1.31366e+07	1.39924e+07	1.41866e+07
249	Ctla2a	6	6	6	43.8	43.8	43.8	15.883	0	17.042	959220000	134	119900000	P12399	P12399	Protein CTLA-2-alpha	1.14263e+06	1.12834e+06	1.50444e+06	1.06206e+06	5.58596e+06	4.53375e+06	944556	1.90203e+06	995426	1.69983e+06	1.17898e+06	1.37325e+06	16747.7	350116	2.42285e+06	456486	3.97212e+06	2.26691e+06	1.63832e+06	16747.7	2.24997e+06	3.05584e+06	2.13164e+06	1.80872e+06	1.28555e+06	1.35675e+06	16747.7	2.6865e+06	1.39215e+06	1.88994e+06	1.48804e+06	1.96772e+06	2.56229e+06
250	Gsn	73	73	53	83.8	83.8	58.8	85.941	0	323.31	526000000000	7712	15900000000	P13020;A0A0J9YUQ8;A0A0J9YUJ8	P13020;A0A0J9YUQ8	Gelsolin	2.18538e+08	1.54289e+08	1.81534e+08	214022894	1.47875e+08	1.72356e+08	206245530	1.42002e+08	1.85199e+08	2.37264e+08	1.63066e+08	1.66836e+08	1.90398e+08	2.02818e+08	2.08939e+08	1.30604e+08	166136809	1.5963e+08	1.06783e+08	1.77046e+08	175105190	2.0762e+08	3.37312e+08	1.74321e+08	2.72624e+08	1.85199e+08	2.10409e+08	2.21199e+08	2.39638e+08	2.09261e+08	2.10704e+08	2.13e+08	2.97321e+08
251	Icam1	11	11	11	21.6	21.6	21.6	58.844	0	20.442	239890000	56	8884800	P13597	P13597	Intercellular adhesion molecule 1	16747.7	82405.1	430491	97371.7	147923	368134	201997	16747.7	177386	164760	209456	209483	205301	118628	258191	187438	140354	16747.7	198508	358786	314566	485573	68853.6	464248	149976	202879	16747.7	16747.7	16747.7	218450	16747.7	16747.7	16747.7
252	Srgn	3	3	3	38.2	38.2	38.2	16.711	0	27.802	79069000	12	15814000	P13609	P13609	Serglycin	16747.7	16747.7	887232	16747.7	16747.7	16747.7	16747.7	16747.7	16747.7	16747.7	16747.7	504015	1.21139e+06	776696	16747.7	1.51091e+06	16747.7	16747.7	727635	16747.7	1.45989e+06	16747.7	16747.7	16747.7	988585	16747.7	16747.7	16747.7	16747.7	16747.7	16747.7	16747.7	16747.7
253	C1qb	8	8	8	31.6	31.6	31.6	26.717	0	89.626	23600000000	537	1963200000	P14106	P14106	Complement C1q subcomponent subunit B	2.58927e+07	3.55447e+07	4.25296e+07	1.47007e+07	4.0467e+07	43839035	2.90913e+07	3.19858e+07	2.33754e+07	1.91602e+07	3.44478e+07	1.87068e+07	2.16516e+07	1.61403e+07	3.13646e+07	2.43816e+07	2.29879e+07	2.27201e+07	2.95943e+07	24067343	2.18473e+07	17443052	2.3008e+07	1.66432e+07	3.12754e+07	2.91392e+07	2.33466e+07	2.99325e+07	2.53488e+07	3.17922e+07	1.99719e+07	2.79878e+07	2.94817e+07
254	H2-Q8;H2-Q6;H2-Q7	8	2	0	22.1	4.9	0	37.41	0	41.593	9190300000	185	483700000	P14430;P79568;E9PWT4;E9QJR9;P14429;L7N260;P14431;Q3V014;P06339	P14430;P79568;E9PWT4;E9QJR9;P14429	H-2 class I histocompatibility antigen, Q8 alpha chain;H-2 class I histocompatibility antigen, Q7 alpha chain	1.12954e+07	1.15924e+07	8.76468e+06	8.46476e+06	5.24389e+06	282140	1.57625e+07	9.32206e+06	8.14875e+06	9.96735e+06	1.17276e+07	9.34571e+06	1.61212e+07	9.44758e+06	1.28961e+07	6.45684e+06	7.53266e+06	6.36556e+06	6.30577e+06	5.29514e+06	1.04303e+07	9.30035e+06	8.10277e+06	8.60404e+06	6.82451e+06	4.54354e+06	5.06365e+06	5.85122e+06	4.32888e+06	4643967	3.28493e+06	4.86854e+06	5.6843e+06
255	Crp	13	13	13	59.1	59.1	59.1	25.36	0	164.67	9413700000	388	1050000000	P14847	P14847	C-reactive protein	1.43986e+07	2.07886e+07	2.68634e+07	1.6254e+07	16747.7	1.00654e+06	1.37653e+07	1.3022e+07	1.37391e+07	1.99125e+07	2.19723e+07	1.09244e+07	2.32606e+07	2.00245e+07	2.02845e+07	1.80309e+07	1.65265e+07	1.93915e+07	4.07346e+06	1.08706e+07	2.46883e+07	2.18087e+07	1.1641e+07	2.62631e+07	1.6241e+07	9.18909e+06	1.82239e+07	1.685e+07	1.39977e+07	1.19852e+07	8.98585e+06	1.27641e+07	1.18158e+07
256	F9	11	11	11	33.1	33.1	33.1	52.977	0	72.52	1374200000	198	72325000	P16294	P16294	Coagulation factor IX;Coagulation factor IXa light chain;Coagulation factor IXa heavy chain	593708	1.21125e+06	909816	524516	1.11433e+06	822375	653136	219580	691649	1.18778e+06	1.74113e+06	799036	1.29903e+06	961992	1.55336e+06	206078	326641	802281	124040	16747.7	252879	16747.7	475755	1.13226e+06	797376	169196	474161	234696	16747.7	1.3552e+06	449756	860546	1.41985e+06
257	Lcat	14	14	14	42.9	42.9	42.9	49.746	0	323.31	14900000000	790	622820000	P16301	P16301	Phosphatidylcholine-sterol acyltransferase	6.62691e+06	9.19681e+06	1.13183e+07	7.56444e+06	7.92573e+06	5.43293e+06	9.93565e+06	7.48178e+06	7.6187e+06	9.57159e+06	1.10343e+07	1.05006e+07	1.47308e+07	8.12821e+06	1.03118e+07	8.61139e+06	7.37887e+06	5.79405e+06	1.11519e+07	6.20938e+06	1.11084e+07	8.19428e+06	7.93925e+06	1.16417e+07	8.19369e+06	5.91354e+06	7.68956e+06	6.2481e+06	5.89543e+06	5.79852e+06	9.36282e+06	7.76414e+06	6.62728e+06
258	EG433182;Eno1	8	8	6	23.7	23.7	18.7	47.14	0	22.416	293440000	66	13338000	Q5FW97;P17182;B1ARR7;B0QZL1;Q6PHC1;B1ARR6;D3Z6E4;A0A0N4SUX5;Q545V3;P17183;A0A0N4SUI6;D3YVD3;D3Z2S4;A0A0N4SUW8;J3QPZ9	Q5FW97;P17182;B1ARR7;B0QZL1;Q6PHC1	Alpha-enolase;Enolase	16747.7	183372	211744	220426	243831	409369	252009	633091	246370	968073	132280	409247	567968	1.11254e+06	957493	179591	337900	155242	181815	835012	996311	1.08128e+06	406710	1.10629e+06	520663	16747.7	127778	16747.7	16747.7	82480.1	103881	121085	16747.7
259	Ctsd	6	6	6	24.1	24.1	24.1	44.953	0	12.578	260310000	80	14462000	Q3UCD9;P18242;F8WIR1;F6Y6L6	Q3UCD9;P18242;F8WIR1;F6Y6L6	Cathepsin D	201278	16747.7	16747.7	16747.7	16747.7	214857	399686	168803	16747.7	339766	162258	238184	309735	560755	1.00387e+06	306791	274092	16747.7	288765	135354	581883	405967	158319	631426	245244	16747.7	333328	16747.7	16747.7	138582	124682	414061	387984
260	P18528	3	1	1	50	19.4	19.4	11.007	0	65.878	14000000000	181	2804600000	P18528	P18528	Ig heavy chain V region 6.96	2.63729e+07	1.52201e+07	3.23787e+07	2.07886e+07	3.60503e+07	3.89294e+07	3.28101e+07	2.78139e+07	1.33792e+07	1.71633e+07	3.17922e+07	4.46703e+07	4.90137e+07	3.33496e+07	2.14598e+07	3.73173e+07	5.43042e+07	1.60721e+07	1.90389e+07	5.26007e+07	1.90898e+07	3.27304e+07	3.90572e+07	3.07667e+07	2.31595e+07	2.45176e+07	3.41791e+07	2.74331e+07	4.07626e+07	3.80722e+07	3.7591e+07	3.39265e+07	2.18473e+07
261	Ighv3-6	4	4	3	44.8	44.8	31	13.095	0	112.88	7956400000	262	1989100000	P18531;A0A075B5S8	P18531;A0A075B5S8	Ig heavy chain V region 3-6	5.10735e+07	2.86811e+06	9.56364e+06	2.64516e+07	1.35335e+07	1.38049e+07	47790667	3.13249e+07	3.83935e+07	2.44946e+07	3.07131e+07	2.71736e+07	2.09155e+07	4.82405e+07	9.28229e+06	2.22841e+07	3.59581e+07	1.73184e+07	3.14706e+07	5.1147e+07	2.77545e+07	3.99986e+07	2.64917e+07	2.09211e+07	2.27231e+07	4.31209e+07	2.24089e+07	4.21657e+07	2.21382e+07	2.90121e+07	5.32947e+07	5.74734e+07	3.06582e+07
262	F2	57	57	57	60.4	60.4	60.4	70.268	0	323.31	228000000000	5463	7853400000	Q3TJ94;P19221;H7BX99	Q3TJ94;P19221;H7BX99	Prothrombin;Prothrombin;Activation peptide fragment 1;Activation peptide fragment 2;Thrombin light chain;Thrombin heavy chain	1.21602e+08	104558871	1.22097e+08	1.0893e+08	1.26479e+08	1.32255e+08	1.0793e+08	1.182e+08	9.47272e+07	120447030	9.41685e+07	1.05191e+08	108684465	1.11277e+08	9.5677e+07	1.04742e+08	1.10694e+08	8.18752e+07	9.38044e+07	9.5127e+07	1.02948e+08	9.18649e+07	1.22583e+08	1.11833e+08	1.09557e+08	1.0758e+08	9.65018e+07	6.1243e+07	9.02732e+07	8.75854e+07	1.02548e+08	1.06062e+08	1.07366e+08
263	Nefh	2	2	2	1	1	1	116.99	0.0056711	2.8352	2002700000	65	52702000	P19246	P19246	Neurofilament heavy polypeptide	492679	369515	16747.7	443234	301563	397395	710828	16747.7	671279	16747.7	1.41753e+06	519543	1.32866e+06	16747.7	788334	16747.7	659972	16747.7	16747.7	16747.7	16747.7	16747.7	490988	16747.7	16747.7	863583	580697	908569	16747.7	721467	729344	885617	973861
264	Hspa5	11	9	9	18.8	17.1	17.1	72.421	0	23.378	627540000	99	20918000	P20029	P20029	78 kDa glucose-regulated protein	312169	474592	317935	273616	16747.7	248431	261646	363881	268117	895503	503367	431156	376979	389668	268365	261144	253753	221985	254339	435084	347943	187646	298466	614732	307320	16747.7	373945	245350	16747.7	209456	16747.7	364439	148563
265	Plg	100	100	100	86.6	86.6	86.6	90.807	0	323.31	1310000000000	16738	29000000000	P20918	P20918	Plasminogen;Plasmin heavy chain A;Activation peptide;Angiostatin;Plasmin heavy chain A, short form;Plasmin light chain B	4.41854e+08	4.46656e+08	5.03116e+08	4.44106e+08	2.94586e+08	3.66791e+08	4.67228e+08	4.15517e+08	4.06778e+08	4.66026e+08	416569426	4.69958e+08	481487842	4.79345e+08	5.15826e+08	3.61681e+08	4.63231e+08	4.17224e+08	4.85246e+08	330912752	4.95967e+08	3.72948e+08	3.97725e+08	3.94734e+08	3.67961e+08	3.14336e+08	3.47954e+08	3.43282e+08	2.96622e+08	3.54761e+08	2.92683e+08	2.93669e+08	3.46058e+08
266	Eno3	5	3	3	15.9	10.8	10.8	47.024	0.0022624	5.7431	52256000	10	2612800	P21550;Q5SX59;Q5SX61;Q5SX60	P21550;Q5SX59;Q5SX61;Q5SX60	Beta-enolase;Enolase	95135.7	89890	117100	16747.7	420030	451550	16747.7	391657	16747.7	16747.7	16747.7	16747.7	16747.7	16747.7	16747.7	16747.7	16747.7	16747.7	16747.7	16747.7	16747.7	16747.7	16747.7	16747.7	16747.7	16747.7	16747.7	16747.7	16747.7	16747.7	16747.7	16747.7	16747.7
267	Gc	73	73	73	93.5	93.5	93.5	53.6	0	323.31	1910000000000	16941	79600000000	P21614;A0A0G2JGM6	P21614	Vitamin D-binding protein	9.88164e+08	1205374252	2127850294	1160837496	1211637225	1575785626	9.85935e+08	1289462798	9.25866e+08	1358876578	1087359135	1238814053	9.61587e+08	1096572366	1456876931	1096572366	1073511420	8.73713e+08	1831641893	1056741297	9.18697e+08	1351075029	1307078380	1099607629	7.97142e+08	9.99596e+08	931962393	752343384	6.55439e+08	6.53928e+08	7.76162e+08	9.14858e+08	8.58861e+08
268	Serpina1b	36	14	13	66.6	30	26.4	45.974	0	323.31	677000000000	4568	39800000000	P22599;D3YZL0	P22599	Alpha-1-antitrypsin 1-2	379946966	3.76772e+08	4.10698e+08	4.13115e+08	2.54905e+08	163980396	5.29726e+08	2.46028e+08	5.38595e+08	4.3977e+08	5.0441e+08	4.15333e+08	3.98927e+08	5.10612e+08	5.48853e+08	4.94684e+08	3.18949e+08	3.15963e+08	3.51419e+08	4.81144e+08	6.47791e+08	5.20312e+08	4.57623e+08	6.02812e+08	4.59504e+08	4.69958e+08	3.79738e+08	5.40875e+08	3.22889e+08	5.0441e+08	5.96373e+08	6.44685e+08	4.07289e+08
269	Ces1c	43	43	31	79.4	79.4	71.8	61.055	0	323.31	2050000000000	9249	82100000000	P23953;F6XTA4;Q8VCT4;Q91WU0;D3Z298;H3BL34;Q3UN14;E9PYP1;Q64176	P23953	Carboxylesterase 1C	9.2249e+08	1543548575	1157813254	9.58105e+08	7.81684e+08	8.56268e+08	9.20599e+08	9.60502e+08	1387418460	1233654770	1204190543	1126148931	1253946030	9.99117e+08	8.45506e+08	8.51434e+08	1190156139	1497398691	9.79923e+08	9.67608e+08	1318471542	1225804332	9.10973e+08	1215123465	8.52244e+08	1110093082	8.68045e+08	9.27911e+08	7.8371e+08	8.67473e+08	1277353229	1187298684	9.83692e+08
270	Tln1	5	5	5	2.8	2.8	2.8	269.82	0.0021834	5.1257	28206000	20	210490	P26039;F6S1V7	P26039	Talin-1	16747.7	16747.7	16747.7	16747.7	16747.7	16747.7	16747.7	16747.7	16747.7	16747.7	16747.7	16747.7	16747.7	16747.7	16747.7	16747.7	16747.7	16747.7	16747.7	16747.7	16747.7	37614.5	16747.7	16747.7	28408	16747.7	16747.7	16747.7	29549.9	16747.7	16747.7	16747.7	16747.7
271	Msn	10	10	8	18.9	18.9	15.9	67.766	0	11.262	103180000	45	3126600	P26041	P26041	Moesin	16747.7	16747.7	16747.7	16747.7	16747.7	16747.7	46597.6	91352.1	16747.7	110563	16747.7	16747.7	281225	338855	90701.2	29394	194450	16747.7	81812.3	482348	411440	636482	277288	421353	16747.7	16747.7	16747.7	16747.7	16747.7	16747.7	16747.7	16747.7	16747.7
272	Klkb1	50	50	49	71.8	71.8	70.7	71.382	0	323.31	118000000000	3546	3027100000	P26262;Q3TZH4;P04187	P26262	Plasma kallikrein;Plasma kallikrein heavy chain;Plasma kallikrein light chain	4.17303e+07	4.5147e+07	5.25019e+07	4.408e+07	3.13039e+07	2.93971e+07	4.14681e+07	4.19068e+07	3.63277e+07	5.83445e+07	4.11553e+07	3.82675e+07	3.86931e+07	4.3062e+07	4.83936e+07	4.91568e+07	3.8793e+07	4.1282e+07	4.47171e+07	3.26938e+07	3.61838e+07	3.70736e+07	4.90794e+07	4.7198e+07	5.37134e+07	3.83935e+07	4.69146e+07	7.16515e+07	3.14706e+07	2.84426e+07	2.95238e+07	3.30078e+07	5.04345e+07
273	Psmb9	2	2	2	14.2	14.2	14.2	23.396	0.0019802	3.4864	78382000	22	7125600	P28076;G3UYK5	P28076;G3UYK5	Proteasome subunit beta type-9	16747.7	16747.7	16747.7	16747.7	16747.7	16747.7	16747.7	16747.7	16747.7	16747.7	16747.7	116076	320060	160977	16747.7	16747.7	16747.7	16747.7	16747.7	207905	16747.7	221950	16747.7	175349	16747.7	16747.7	16747.7	16747.7	16747.7	16747.7	16747.7	327887	529437
274	Mug1	133	133	74	82.2	82.2	55.6	165.3	0	323.31	4820000000000	35503	72000000000	P28665	P28665	Murinoglobulin-1	1198626755	8.34e+08	955692257	1045216151	7.31704e+08	7.46273e+08	1195820023	8.98661e+08	9.99596e+08	1120368826	9.92584e+08	1023737470	1039936475	9.31779e+08	906930034	9.1755e+08	9.16783e+08	1035268130	8.41571e+08	7.02595e+08	9.83692e+08	1009810371	1065202356	1001269343	1067988729	9.25866e+08	1006712947	8.63403e+08	9.79923e+08	9.92584e+08	7.2972e+08	1070758367	1076248037
275	Mug2	51	4	4	28.4	2.8	2.8	162.38	0	55.859	6844400000	270	95061000	P28666	P28666	Murinoglobulin-2	230613	268549	145357	241926	4.36447e+06	16747.7	5.01198e+06	3.37951e+06	4.37288e+06	3.26857e+06	75023.8	2.09952e+06	2.56091e+06	1.89394e+06	5.55747e+06	101050	4.044e+06	6.51276e+06	4.7718e+06	84470.7	193874	87807.3	108388	137201	7.38397e+06	2.09952e+06	1.43604e+06	1.38077e+06	1.25235e+06	28186.9	16747.7	1.19129e+06	2.77014e+06
276	Vcam1	20	20	20	30.4	30.4	30.4	81.316	0	105.65	1350700000	261	32160000	Q3UPN1;P29533;A0A0G2JFP9;Q544V4	Q3UPN1;P29533	Vascular cell adhesion protein 1	911044	670619	1.01196e+06	982989	580004	846280	893767	1.21399e+06	515100	1.11591e+06	569454	1.0016e+06	1.16474e+06	436179	830912	940295	1.23565e+06	270203	752037	1.06441e+06	950355	415500	593655	859454	704818	39893.6	159488	808663	393974	289854	16747.7	180305	16747.7
277	Serpina3c	7	2	2	15.8	7.4	7.4	46.765	0.0020492	3.969	37913000	13	1805400	P29621	P29621	Serine protease inhibitor A3C	170809	16747.7	124063	169302	16747.7	16747.7	193302	16747.7	114450	201610	106317	134412	132840	16747.7	16747.7	16747.7	16747.7	16747.7	16747.7	16747.7	16747.7	16747.7	16747.7	16747.7	16747.7	16747.7	16747.7	16747.7	95748.7	16747.7	16747.7	16747.7	16747.7
278	Ahsg	30	30	30	67.5	67.5	67.5	37.325	0	323.31	3390000000000	9012	308000000000	Q3UEK9;P29699	Q3UEK9;P29699	Alpha-2-HS-glycoprotein	4720013046	4311084933	4581057237	3538778428	4322887350	4395231413	4710471650	4601641021	4418157976	4839089667	4738926964	3842399906	4908069163	4766883061	4642057812	4372003185	3690042643	4236791827	3134600446	4632046030	4700873291	4812402356	3645623061	3783804231	3660518785	3276325193	3327592184	3293524798	3134600446	3756763027	3491561374	4681503629	4700873291
279	Vtn	22	22	22	49.8	49.8	49.8	54.848	0	323.31	215000000000	4310	9777800000	P29788;Q8BP99	P29788	Vitronectin	168648665	1.24863e+08	1.47651e+08	1.4857e+08	1.01162e+08	1.14999e+08	1.6029e+08	1.65758e+08	1.48763e+08	157727254	1.99912e+08	2.03284e+08	1.64803e+08	1.58059e+08	1.69194e+08	1.44824e+08	1.42993e+08	1.34e+08	1.27279e+08	1.11253e+08	1.59354e+08	1.6264e+08	1.28014e+08	1.3712e+08	1.72127e+08	1.21844e+08	1.13686e+08	122635604	1.21301e+08	1.40391e+08	1.38382e+08	1.42069e+08	1.31056e+08
280	Ppic	6	6	6	39.2	39.2	39.2	22.794	0	34.161	503630000	54	45784000	Q3UC73;P30412	Q3UC73;P30412	Peptidyl-prolyl cis-trans isomerase;Peptidyl-prolyl cis-trans isomerase C	16747.7	16747.7	676739	16747.7	16747.7	16747.7	16747.7	16747.7	16747.7	16747.7	16747.7	16747.7	16747.7	16747.7	16747.7	16747.7	305213	16747.7	16747.7	16747.7	16747.7	16747.7	16747.7	16747.7	16747.7	16747.7	200533	16747.7	16747.7	16747.7	16747.7	213812	16747.7
281	Saa4	11	11	11	70.8	70.8	70.8	15.088	0	323.31	71400000000	1195	8925400000	P31532	P31532	Serum amyloid A-4 protein	1.38676e+08	8.82907e+07	1.16764e+08	8.61635e+07	8.00315e+07	7.7794e+07	1.31805e+08	1.05243e+08	1.0758e+08	1.72627e+08	1.40391e+08	2.12441e+08	171931527	1.65671e+08	1.32294e+08	1.7017e+08	1.19434e+08	1.15236e+08	157727254	1.07272e+08	2.1571e+08	1.69756e+08	2.39588e+08	1.94147e+08	9.07151e+07	7.35545e+07	1.04917e+08	8.47324e+07	7.25707e+07	1.47519e+08	8.46762e+07	1.1012e+08	9.90412e+07
282	S100a9	2	2	2	23.9	23.9	23.9	13.049	0.0020243	3.8677	37559000	11	5365600	Q3UP42;P31725	Q3UP42;P31725	Protein S100-A9	16747.7	16747.7	16747.7	16747.7	16747.7	16747.7	16747.7	16747.7	16747.7	1.66618e+06	16747.7	16747.7	1.41598e+06	16747.7	16747.7	1.10919e+06	16747.7	129042	16747.7	16747.7	232531	440528	506634	16747.7	16747.7	268117	16747.7	16747.7	16747.7	16747.7	16747.7	16747.7	16747.7
283	Serpinc1	46	46	46	80.2	80.2	80.2	52.003	0	323.31	437000000000	5958	14600000000	Q543J5;P32261;A0A0A6YWH7;A0A0A6YXS8;A0A0A6YX49;A0A0A6YX70	Q543J5;P32261;A0A0A6YWH7	Antithrombin-III	207256723	2.05582e+08	2.12787e+08	2.03831e+08	132809849	1.39008e+08	2.17128e+08	1.94773e+08	196690600	2.83242e+08	1.79408e+08	2.25544e+08	248130118	2.89228e+08	251945521	1.91772e+08	2.59225e+08	1.41605e+08	1.66378e+08	1.60673e+08	1.95575e+08	198486228	2.0133e+08	2.132e+08	2.11993e+08	1.65855e+08	1.51627e+08	2.08231e+08	1.66378e+08	1.5505e+08	1.79225e+08	1.82677e+08	1.8499e+08
284	Mmp2	16	16	16	40.5	40.5	40.5	74.102	0	67.469	415060000	100	12971000	P33434	P33434	72 kDa type IV collagenase;PEX	82832.3	16747.7	16747.7	16747.7	16747.7	16747.7	16747.7	16747.7	94285.2	103920	16747.7	16747.7	102269	16747.7	16747.7	16747.7	68461	16747.7	16747.7	28538.5	16747.7	16747.7	76291.1	74412.3	101479	114450	16747.7	16747.7	16747.7	53562.5	16747.7	140744	193874
285	Proc	11	11	11	31.3	31.3	31.3	51.818	0	62.434	4871200000	407	231960000	P33587	P33587	Vitamin K-dependent protein C;Vitamin K-dependent protein C light chain;Vitamin K-dependent protein C heavy chain;Activation peptide	3.14722e+06	5.45725e+06	5.88133e+06	1.52886e+06	2.77028e+06	1.60868e+06	2.36376e+06	3.18588e+06	2.15027e+06	6.47259e+06	5.69349e+06	3.84947e+06	3.89043e+06	3.40021e+06	6.39824e+06	3.12327e+06	2.04152e+06	2.77307e+06	4.50711e+06	1.31956e+06	2.67151e+06	2.41764e+06	1.20327e+06	3.91068e+06	4.10577e+06	835543	2.24546e+06	587042	1.28923e+06	1.59846e+06	800691	3.01794e+06	4.39541e+06
286	Apoc1	6	6	6	43.2	43.2	43.2	9.6963	0	16.783	4290300000	138	1430100000	P34928	P34928	Apolipoprotein C-I;Truncated apolipoprotein C-I	1.69294e+07	3.03777e+07	2.48551e+07	1.73495e+07	2.10941e+07	2.52606e+07	2.37921e+07	2.13385e+07	16747.7	16747.7	16747.7	1.97888e+07	1.64678e+07	16747.7	2.42366e+07	1.10703e+07	14939768	909816	1.82682e+07	16747.7	1.15592e+07	1.60921e+07	2.05269e+07	1.73064e+07	1.69883e+07	1.7793e+07	2.44751e+07	2.67846e+07	1.90389e+07	8.6337e+06	16747.7	1.67674e+07	2.56228e+07
287	Flt4	14	14	14	13.5	13.5	13.5	153.01	0	122.09	1785500000	294	28798000	Q5SU94;P35917	Q5SU94;P35917	Receptor protein-tyrosine kinase;Vascular endothelial growth factor receptor 3	889293	954983	1.57868e+06	905059	1.14316e+06	1.23412e+06	560130	404482	971045	944556	427989	638831	351559	327887	562406	284293	315775	282829	501085	167324	361108	311430	215208	509636	572087	257304	524624	278800	156526	473407	111151	172671	262530
288	Mbl1	14	14	14	57.3	57.3	57.3	25.396	0	209.68	24900000000	750	1920000000	P39039	P39039	Mannose-binding protein A	3.14645e+07	2.26416e+07	2.18889e+07	2.39314e+07	2.24749e+07	2.1654e+07	2.79136e+07	2.66148e+07	1.85718e+07	3.12213e+07	3.90158e+07	2.88465e+07	2.6021e+07	2.61233e+07	2.73311e+07	3.15247e+07	1.72253e+07	2.44592e+07	2.70257e+07	1.18414e+07	3.11878e+07	2.2639e+07	2.40308e+07	2.44121e+07	2.90215e+07	2.55549e+07	3.91701e+07	4.09533e+07	2.42419e+07	3.70686e+07	2.2042e+07	3.75811e+07	3.44122e+07
289	Timp3	5	5	5	29.4	29.4	29.4	24.182	0	8.979	77608000	10	7055300	Q54AE5;P39876;E9QAB2	Q54AE5;P39876	Metalloproteinase inhibitor 3	16747.7	16747.7	16747.7	16747.7	16747.7	16747.7	16747.7	16747.7	16747.7	16747.7	16747.7	16747.7	16747.7	16747.7	16747.7	16747.7	16747.7	16747.7	16747.7	16747.7	16747.7	16747.7	16747.7	16747.7	16747.7	16747.7	16747.7	16747.7	16747.7	16747.7	16747.7	16747.7	16747.7
290	Tkt	12	12	12	20.7	20.7	20.7	67.63	0	42.004	295080000	84	11349000	P40142	P40142	Transketolase	16747.7	16747.7	16747.7	16747.7	138628	153816	156236	230578	128705	1.35939e+06	169876	691649	421223	838598	310528	108217	604876	67489.8	432588	1.56417e+06	1.386e+06	1.13362e+06	266321	1.55826e+06	54211.3	16747.7	16747.7	16747.7	16747.7	16747.7	16747.7	83549.6	68331.7
291	Mbl2	22	22	22	48	48	48	25.957	0	250.89	18500000000	763	1539900000	Q3UEK1;P41317	Q3UEK1;P41317	Mannose-binding protein C	5.47043e+06	6.51535e+06	1.45753e+07	4.37647e+06	3.11776e+06	4.109e+06	8.75561e+06	5.54521e+06	6.84601e+06	1.18717e+07	1.38189e+07	6.34678e+06	1.08283e+07	4.86206e+06	2.7778e+06	5.77823e+06	4.58435e+06	6.22311e+06	7.64823e+06	3.8455e+06	9.22456e+06	6.174e+06	4.13603e+06	1.37005e+07	1.47246e+07	1.12434e+07	1.01422e+07	1.75501e+07	1.86436e+07	1.22427e+07	2.83433e+07	2.28559e+07	3.17469e+07
292	Lifr	40	40	40	33.8	33.8	33.8	122.57	0	323.31	91900000000	3576	1506900000	P42703	P42703	Leukemia inhibitory factor receptor	3.7578e+07	3.10171e+07	3.43e+07	2.50104e+07	1.3187e+07	1.50287e+07	2.73554e+07	1.64009e+07	1.97888e+07	2.85271e+07	2.72846e+07	2.93586e+07	2.97217e+07	1.52565e+07	4.07179e+07	2.90636e+07	1.22268e+07	2.8823e+07	2.63853e+07	8.62164e+06	3.00793e+07	1.95139e+07	1.11791e+07	1.47891e+07	2.36621e+07	1.70801e+07	2.1498e+07	1.72057e+07	1.461e+07	1.17276e+07	1.58758e+07	1.88275e+07	1.94674e+07
293	Clec3b	8	8	8	43.1	43.1	43.1	22.255	0	55.266	1618500000	218	231220000	Q8CFZ6;P43025	Q8CFZ6;P43025	Tetranectin	4.40676e+06	6.37543e+06	3.71943e+06	2.81796e+06	3.39802e+06	4.18779e+06	5.22472e+06	5.43849e+06	2.70868e+06	4.50711e+06	4.2598e+06	5.88065e+06	4.24586e+06	4.78004e+06	4.76757e+06	3.07083e+06	2.39265e+06	3.35959e+06	4.15251e+06	2.43756e+06	2.92945e+06	3.60162e+06	2.79112e+06	1.92509e+06	2.28702e+06	2.64546e+06	2.20403e+06	1.8957e+06	1.93239e+06	3.28439e+06	1.08112e+06	2.36414e+06	3.59081e+06
294	Man1a;Man1a1	13	13	13	27	27	27	73.275	0	37.379	1248600000	179	37835000	Q544T7;P45700;D3Z799	Q544T7;P45700;D3Z799	alpha-1,2-Mannosidase;Mannosyl-oligosaccharide 1,2-alpha-mannosidase IA	649780	767814	813845	1.03236e+06	199307	135919	597267	593599	185317	157687	416093	475115	189282	752497	544675	330670	623803	450632	29549.9	189991	262530	355320	1.26073e+06	1.07926e+06	366121	431156	264856	16747.7	16747.7	239183	16747.7	454851	435643
295	Gpx3	13	13	12	57.5	57.5	52.2	25.424	0	144.29	46800000000	1135	4255100000	P46412;D3Z2Y7;D3Z7Y0	P46412;D3Z2Y7;D3Z7Y0	Glutathione peroxidase 3;Glutathione peroxidase	28693892	2.843e+07	3.61426e+07	4.04898e+07	1.88905e+07	2.75122e+07	5.86569e+07	1.48097e+07	4.0667e+07	4.18228e+07	4.00674e+07	3.64483e+07	5.04516e+07	5.25837e+07	3.66139e+07	4.46087e+07	3.78433e+07	3.44285e+07	2.8986e+07	3.07029e+07	4.88968e+07	3.13054e+07	6.03026e+07	4.33266e+07	5.52366e+07	2.85271e+07	4.03363e+07	5.39346e+07	4.77367e+07	3.35374e+07	3.12842e+07	4.29394e+07	6.48701e+07
296	Igfbp3	5	5	5	18.5	18.5	18.5	31.687	0	11.835	136580000	36	8536300	P47878	P47878	Insulin-like growth factor-binding protein 3	16747.7	16747.7	16747.7	116824	1.36823e+06	2.46476e+06	16747.7	261793	16747.7	329096	16747.7	128705	290827	216384	142556	154707	349343	319464	209360	16747.7	171735	151543	165871	189621	180819	152824	16747.7	16747.7	16747.7	16747.7	16747.7	16747.7	16747.7
297	Ptx3	2	2	2	7.6	7.6	7.6	41.811	0.0022222	5.4018	41037000	18	1865300	P48759	P48759	Pentraxin-related protein PTX3	16747.7	16747.7	16747.7	16747.7	16747.7	16747.7	16747.7	16747.7	16747.7	16747.7	16747.7	16747.7	16747.7	16747.7	16747.7	16747.7	16747.7	16747.7	16747.7	16747.7	16747.7	16747.7	16747.7	16747.7	16747.7	16747.7	16747.7	16747.7	16747.7	177287	16747.7	16747.7	16747.7
298	Serpind1	21	21	21	46	46	46	54.496	0	249.7	28100000000	1048	1219900000	P49182	P49182	Heparin cofactor 2	1.2299e+07	1.99034e+07	1.6506e+07	1.59123e+07	6.23818e+06	7.79979e+06	1.42849e+07	7.1929e+06	1.09893e+07	1.47088e+07	1.74801e+07	1.51985e+07	1.68237e+07	1.13183e+07	1.62015e+07	8.40908e+06	1.01532e+07	9.82694e+06	7.82994e+06	9.01834e+06	1.94674e+07	1.0095e+07	1.13998e+07	1.62669e+07	1.22839e+07	1.33792e+07	1.31309e+07	1.8339e+07	1.16628e+07	1.43341e+07	1.8765e+07	1.92062e+07	18035860
299	Psma2	4	4	4	32.5	32.5	32.5	25.926	0	21.823	233630000	58	17971000	P49722	P49722	Proteasome subunit alpha type-2	16747.7	16747.7	16747.7	365602	16747.7	16747.7	16747.7	574834	16747.7	16747.7	406330	1.17537e+06	1.23677e+06	16747.7	16747.7	16747.7	16747.7	16747.7	16747.7	16747.7	16747.7	16747.7	16747.7	16747.7	16747.7	193302	440215	128394	16747.7	416093	482736	471425	252879
300	Camp	2	2	2	21.4	21.4	21.4	19.581	0	22.25	65024000	10	9289100	P51437	P51437	Cathelin-related antimicrobial peptide	16747.7	16747.7	16747.7	16747.7	2.72039e+06	3.78446e+06	16747.7	1.05513e+06	16747.7	479231	16747.7	16747.7	491031	16747.7	226674	16747.7	16747.7	16747.7	16747.7	322984	16747.7	582394	16747.7	361714	16747.7	16747.7	16747.7	16747.7	16747.7	16747.7	16747.7	16747.7	16747.7
301	Lum	19	19	19	47	47	47	38.265	0	323.31	52300000000	1430	3266400000	P51885	P51885	Lumican	4.53403e+07	3.86993e+07	4.37629e+07	3.26335e+07	2.1982e+07	2.30413e+07	3.5527e+07	3.66057e+07	3.94719e+07	5.34671e+07	4.34033e+07	5.00049e+07	6.55505e+07	3.42464e+07	4.1846e+07	4.19378e+07	3.50755e+07	3.14345e+07	5.10498e+07	3.54843e+07	3.80804e+07	3.45159e+07	3.24961e+07	5.93762e+07	3.01833e+07	3.34013e+07	2.96428e+07	2.93014e+07	2.16713e+07	2.52739e+07	2.71289e+07	3.95688e+07	4.01031e+07
302	Apod	9	9	9	38.1	38.1	38.1	21.53	0	182.85	20700000000	870	2065400000	P51910	P51910	Apolipoprotein D	2.75215e+07	3.98701e+07	3.81063e+07	4.16318e+07	3.9245e+07	3.5836e+07	3.92781e+07	3.4785e+07	2.72515e+07	3.87249e+07	3.70686e+07	35606532	3.60475e+07	3.6855e+07	3.85652e+07	2.96687e+07	2.50359e+07	3.08363e+07	2.76719e+07	2.71603e+07	3.06582e+07	2.40198e+07	2.9412e+07	2.67925e+07	4.65196e+07	2.39387e+07	3.22074e+07	3.97619e+07	3.53171e+07	2.11932e+07	2.34248e+07	3.1415e+07	3.53024e+07
303	Pon1	19	19	19	62.8	62.8	62.8	39.565	0	323.31	101000000000	1541	7802200000	P52430;H3BK03;H3BLB8	P52430;H3BK03	Serum paraoxonase/arylesterase 1	1.08491e+08	9.9896e+07	1.33598e+08	1.22851e+08	6.97151e+07	7.27662e+07	1.26211e+08	1.09509e+08	1.27667e+08	1.11833e+08	1.09603e+08	101066582	149897903	1.03135e+08	1.07848e+08	7.96182e+07	9.16817e+07	7.07631e+07	6.35992e+07	7.04321e+07	7.78512e+07	6.53828e+07	1.04727e+08	8.64981e+07	8.41617e+07	6.45879e+07	7.0184e+07	1.03501e+08	8.05211e+07	6.28113e+07	6.19008e+07	7.95174e+07	8.03926e+07
304	Pkm	22	22	22	55.7	55.7	55.7	57.844	0	195.28	2618100000	442	79336000	P52480;E9Q509;G3X925;P53657	P52480	Pyruvate kinase PKM	1.54504e+06	139426	1.22782e+06	716171	434747	677841	1.37857e+06	2.26005e+06	1.58573e+06	3.58789e+06	2.54464e+06	2.38891e+06	3.81914e+06	1.81923e+06	2.16304e+06	439704	1.15879e+06	942283	466908	769110	674203	1.45166e+06	615244	1.84308e+06	750142	613194	749761	668108	231569	488216	255457	1.00654e+06	620846
305	Pltp	9	9	9	20.9	20.9	20.9	54.452	0	61.392	2406500000	306	100270000	Q3UFS5;P55065;A2A5K2;A2A5K3;A2A5K4	Q3UFS5;P55065;A2A5K2;A2A5K3	Phospholipid transfer protein	540273	840942	1.69236e+06	1.41685e+06	1.29892e+06	1.374e+06	870809	900330	1.11115e+06	219580	766308	1.64775e+06	1.85895e+06	496560	855561	371832	243363	246575	336304	16747.7	120527	864166	1.64658e+06	1.35406e+06	666558	446719	309615	989994	265164	766308	684127	1.14148e+06	1.7108e+06
306	Cdh5	9	9	9	14	14	14	87.902	0	25.981	392580000	70	12268000	P55284	P55284	Cadherin-5	119977	16747.7	263628	305707	16747.7	114960	16747.7	16747.7	550570	93051.7	354571	297026	774702	16747.7	216620	16747.7	83368.6	16747.7	619979	16747.7	16747.7	166123	16747.7	144909	16747.7	16747.7	113697	16747.7	752037	268977	137866	127839	16747.7
307	Serpina7	9	9	9	26.5	26.5	26.5	48.08	0	78.251	1010100000	165	48099000	Q3UEL9;P61939;Q8BII9	Q3UEL9;P61939;Q8BII9	Thyroxine-binding globulin	126709	327887	16747.7	882598	16747.7	94643.9	433712	689791	202879	150177	789548	933518	902281	236829	16747.7	386228	203448	16747.7	323856	410623	107328	16747.7	16747.7	525595	165393	143362	507008	785669	16747.7	519452	16747.7	16747.7	325458
308	Hspa8	16	16	13	28.7	28.7	24.9	68.778	0	32.224	1125500000	204	35172000	Q504P4;P63017;D3Z5E2;P17156;D3YW43;A1L347;P16627	Q504P4;P63017	Heat shock cognate 71 kDa protein	270988	292494	445311	284565	290000	420859	578786	1.16285e+06	813204	2.37537e+06	1.70558e+06	1.85253e+06	2.7152e+06	1.60434e+06	1.89174e+06	784948	810035	747898	679577	1.45554e+06	1.85651e+06	2.71205e+06	1.53137e+06	3.19088e+06	255518	235637	191503	160415	16747.7	259026	117657	234471	127271
309	Ywhaz	7	7	6	32.2	32.2	28.2	27.771	0	23.401	170320000	64	12166000	P63101;D3YXN6;D3YXF4;A8IP69;P68510;P61982;O70456;D3YW45;F6YY69;F6VW30;P68254;Q9CQV8	P63101	14-3-3 protein zeta/delta	68075.3	16747.7	16747.7	16747.7	408436	16747.7	16747.7	136417	16747.7	524323	16747.7	316415	433555	207267	207151	115477	149031	16747.7	16747.7	565350	401352	753624	429210	931327	16747.7	16747.7	16747.7	16747.7	16747.7	16747.7	16747.7	16747.7	16747.7
310	Actg1	34	1	1	77.9	4.5	4.5	41.792	0	45.713	262240000	28	13112000	Q4KL81;P63260;B1ATY1;G3UZ07;G3UYG0;E9Q606;F8WGM8;F6WX90;V9GXQ2;E9Q3M9	Q4KL81;P63260	Actin, cytoplasmic 2;Actin, cytoplasmic 2, N-terminally processed	323113	16747.7	380924	351421	601517	748439	335438	521926	431156	698787	626251	534871	411246	16747.7	398305	401052	16747.7	16747.7	393974	514229	374796	16747.7	16747.7	348747	286675	16747.7	16747.7	16747.7	16747.7	342524	16747.7	16747.7	16747.7
311	Actc1;Acta1;Actg2;Acta2	22	3	3	41.4	11.9	11.9	42.019	0	162.34	8471800000	400	423590000	Q497E4;P68134;P68033;Q3UJ36;P63268;P62737;D3YZY0;D3Z2K3	Q497E4;P68134;P68033;Q3UJ36;P63268;P62737;D3YZY0;D3Z2K3	Actin, alpha skeletal muscle;Actin, alpha cardiac muscle 1;Actin, gamma-enteric smooth muscle;Actin, aortic smooth muscle	3.3315e+06	4.71075e+06	7.19667e+06	4.46457e+06	8.10567e+06	1.49051e+06	8.37496e+06	1.2327e+07	5.43879e+06	1.30428e+07	7.43791e+06	1.49106e+07	1.28075e+07	1.71936e+07	1.14355e+07	1.01294e+07	1.46562e+07	1.10522e+07	1.36845e+07	1.45545e+07	1.53603e+07	2.10517e+07	1.405e+07	1.86598e+07	5.41047e+06	3.09789e+06	3.94078e+06	4.85817e+06	2.86148e+06	3.4856e+06	2.55712e+06	3.07257e+06	2.98091e+06
312	Hist1h3a;H3f3a;Hist2h3b;Hist1h3b;H3f3c	4	4	4	40.4	40.4	40.4	15.404	0	31.797	66373000	18	16593000	P68433;E0CZ27;F8WI35;B9EI85;P84244;P84228;P02301;E0CYN1;E0CYR7	P68433;E0CZ27;F8WI35;B9EI85;P84244;P84228;P02301	Histone H3.1;Histone H3;Histone H3.3;Histone H3.2;Histone H3.3C	16747.7	16747.7	16747.7	16747.7	16747.7	16747.7	16747.7	16747.7	16747.7	848461	16747.7	16747.7	951784	652117	1.44427e+06	16747.7	16747.7	16747.7	826836	16747.7	1.52817e+06	1.55417e+06	16747.7	3.77038e+06	3.03712e+06	16747.7	16747.7	16747.7	16747.7	16747.7	16747.7	16747.7	16747.7
313	Clec4f	10	10	10	22.8	22.8	22.8	61.268	0	47.534	190050000	36	6334900	P70194	P70194	C-type lectin domain family 4 member F	16747.7	16747.7	16747.7	16747.7	539852	538116	16747.7	38832.9	169196	1.56057e+06	199853	907627	2.47188e+06	266004	409304	296050	38315.1	16747.7	109398	122548	16747.7	117318	205657	182714	16747.7	16747.7	16747.7	16747.7	16747.7	16747.7	16747.7	16747.7	16747.7
314	Sepp1	12	12	12	37.6	37.6	37.6	42.705	0	211.22	18000000000	439	858190000	P70274;E0CZC5;E0CX80;E0CZ76;E0CY03	P70274;E0CZC5	Selenoprotein P	1.32589e+07	8.34876e+06	2.06483e+07	4.06111e+06	4.81442e+06	7.15886e+06	1.51707e+07	3.45669e+06	1.62841e+07	8.08596e+06	1.68404e+07	4.21236e+06	9.48065e+06	4.39099e+06	1.46782e+07	2.05066e+07	1.08121e+06	1.25737e+07	5.76874e+06	8.82709e+06	1.41866e+07	9.49875e+06	1.68653e+07	6.62582e+06	2.07019e+06	738918	1.91521e+06	2.27006e+06	1.19211e+06	1.77943e+06	1.99855e+06	2.23774e+06	2.87128e+06
315	F7	11	11	11	28.9	28.9	28.9	50.276	0	31.92	1034500000	208	43102000	Q542C2;P70375	Q542C2;P70375	Coagulation factor VII;Factor VII light chain;Factor VII heavy chain	1.31026e+06	1.2801e+06	938541	636082	131552	204468	689852	783196	349811	679577	1.45726e+06	386228	834327	688119	464248	831247	697259	524870	597267	345677	1.32592e+06	531532	1.32675e+06	772028	629599	87888	456655	16747.7	189692	503367	16747.7	75968.5	336665
316	Igfals	23	23	23	46.6	46.6	46.6	66.959	0	263.65	13200000000	1096	574550000	P70389	P70389	Insulin-like growth factor-binding protein complex acid labile subunit	1.00226e+07	1.18842e+07	1.06072e+07	1.09407e+07	5.46312e+06	2.9126e+06	9.51804e+06	4.92233e+06	8.79367e+06	9.18076e+06	1.05828e+07	8.25847e+06	1.31019e+07	5.86119e+06	1.07377e+07	7.63316e+06	5.84479e+06	5.42026e+06	6.70473e+06	4.40002e+06	6.62728e+06	5.6079e+06	9.26278e+06	7.28958e+06	7.68853e+06	5.10971e+06	7.5296e+06	7.07681e+06	7.17036e+06	4.41797e+06	3.92538e+06	8.09186e+06	7.03276e+06
317	Sparcl1	14	14	14	27.8	27.8	27.8	72.286	0	38.69	1100700000	205	35507000	P70663;A0A0G2JFH7	P70663	SPARC-like protein 1	575657	245937	601201	507608	82008.6	16747.7	324282	441171	417387	555849	643422	585405	1.06791e+06	317289	695446	412223	389750	181815	407008	386228	294274	381264	38484.6	401011	912565	417387	299030	512385	164760	854594	752282	264314	466630
318	Igkv8-16	2	2	2	13.2	13.2	13.2	13.251	0.0057803	2.9556	1098400000	44	156910000	P84750;A0A0G2JGT0;A0A075B5N6;A0A0G2JDG9	P84750;A0A0G2JGT0;A0A075B5N6;A0A0G2JDG9	Ig kappa chain V region Mem5	16747.7	16747.7	1.65614e+06	7.71995e+06	16747.7	16747.7	16747.7	16747.7	16747.7	16747.7	16747.7	3.40408e+06	7.90121e+06	16747.7	16747.7	16747.7	4.91393e+06	16747.7	16747.7	16747.7	16747.7	16747.7	3.49801e+06	4.35427e+06	1.81859e+06	1.25235e+06	1.11995e+06	1.4161e+06	3.23004e+06	2.70507e+06	3.77318e+06	4.38392e+06	1.78602e+06
319	Serping1	19	19	19	38.9	38.9	38.9	55.584	0	323.31	27200000000	1037	1180600000	P97290;A2ATR8	P97290;A2ATR8	Plasma protease C1 inhibitor	9.82485e+06	1.45534e+07	1.86608e+07	1.02775e+07	1.18342e+07	8.3919e+06	9.73683e+06	7.04887e+06	1.12434e+07	1.23966e+07	1.96161e+07	2.09177e+07	1.74319e+07	1.00595e+07	1.94429e+07	2.00775e+07	1.17066e+07	8.4533e+06	1.13954e+07	8.22101e+06	1.00462e+07	1.29858e+07	1.71973e+07	1.44956e+07	6.33253e+06	6.70108e+06	9.06646e+06	5.61626e+06	5.30179e+06	9.01786e+06	1.18678e+07	1.42378e+07	9.41814e+06
320	Serpinf1	3	3	3	18.2	18.2	18.2	46.233	0	11.119	25857000	15	1292800	P97298;E9PWS2;B7ZC25;F6S1M4	P97298;E9PWS2;B7ZC25	Pigment epithelium-derived factor	16747.7	16747.7	16747.7	16747.7	16747.7	16747.7	16747.7	16747.7	16747.7	16747.7	16747.7	16747.7	16747.7	16747.7	16747.7	16747.7	16747.7	16747.7	16747.7	16747.7	16747.7	16747.7	16747.7	16747.7	16747.7	16747.7	16747.7	64499.3	16747.7	100244	55288	95805.1	16747.7
321	Fap	11	11	11	20.9	20.9	20.9	87.944	0	67.968	533140000	80	11590000	P97321;G3UXR2;G3UZ14	P97321;G3UXR2	Prolyl endopeptidase FAP;Antiplasmin-cleaving enzyme FAP, soluble form	16747.7	16747.7	62947.1	16747.7	16747.7	16747.7	75491.9	16747.7	56659.6	66609.8	82480.1	92737.9	108532	99730.5	102086	16747.7	101121	16747.7	16747.7	16747.7	46660.7	45845	115079	46120.9	16747.7	16747.7	16747.7	16747.7	16747.7	16747.7	16747.7	16747.7	16747.7
322	Anpep	5	5	5	6.5	6.5	6.5	109.65	0.0022124	5.3584	19640000	8	392800	P97449	P97449	Aminopeptidase N	16747.7	16747.7	16747.7	16747.7	16747.7	16747.7	16747.7	16747.7	16747.7	16747.7	16747.7	16747.7	16747.7	16747.7	16747.7	16747.7	16747.7	16747.7	16747.7	16747.7	16747.7	16747.7	16747.7	16747.7	16747.7	16747.7	16747.7	16747.7	16747.7	16747.7	16747.7	16747.7	16747.7
323	Masp1	23	23	23	39.8	39.8	39.8	79.967	0	180.17	3801400000	504	118800000	P98064	P98064	Mannan-binding lectin serine protease 1;Mannan-binding lectin serine protease 1 heavy chain;Mannan-binding lectin serine protease 1 light chain	1.99923e+06	1.03488e+06	1.06837e+06	1.19659e+06	1.05249e+06	1.89128e+06	2.15027e+06	1.85702e+06	1.38886e+06	2.70868e+06	2.79581e+06	1.28359e+06	2.90163e+06	2.06305e+06	2.11451e+06	1.5905e+06	978721	1.91206e+06	1.35939e+06	1.17009e+06	2.11847e+06	1.72872e+06	2.26091e+06	2.77483e+06	728186	1.82473e+06	2.00394e+06	884984	779336	1.26054e+06	549361	793304	2.46714e+06
324	C1qa	8	8	8	35.1	35.1	35.1	25.974	0	99.339	17800000000	638	1110800000	P98086	P98086	Complement C1q subcomponent subunit A	1.79264e+07	1.5885e+07	2.02736e+07	1.4992e+07	6.93253e+06	6.70197e+06	2.04178e+07	8.74659e+06	2.45176e+07	1.27287e+07	2.32619e+07	7.6187e+06	1.55606e+07	1.20458e+07	1.49655e+07	1.15713e+07	1.38258e+07	9.32902e+06	1.03978e+07	1.64435e+07	1.66663e+07	1.08951e+07	1.64853e+07	1.42159e+07	1.1751e+07	1.09893e+07	8.87668e+06	1.57236e+07	1.33163e+07	1.14793e+07	7.05559e+06	1.24138e+07	1.06431e+07
325	Psmb4	2	2	2	8.7	8.7	8.7	29.116	0.0022321	5.49	202060000	34	18369000	P99026	P99026	Proteasome subunit beta type-4	16747.7	353880	658827	393435	16747.7	16747.7	16747.7	16747.7	16747.7	918097	16747.7	16747.7	1.7215e+06	16747.7	16747.7	16747.7	16747.7	16747.7	16747.7	16747.7	16747.7	16747.7	353785	410948	16747.7	16747.7	16747.7	16747.7	16747.7	16747.7	822591	16747.7	16747.7
326	Apoa1	59	59	59	85.2	85.2	85.2	30.615	0	323.31	6850000000000	22357	489000000000	Q00623	Q00623	Apolipoprotein A-I;Proapolipoprotein A-I;Truncated apolipoprotein A-I	9175597294	6320149644	6520649491	6527718395	6336810681	6393409204	6609263262	9175597294	6409107681	6697331718	6628747433	6709341052	9175597294	6647889777	6562418339	6377504168	6596079361	6215272802	6345057895	6555562984	9175597294	6679058147	6576004782	6654196147	6582736618	6409107681	6432276815	6416880713	6345057895	9175597294	6506379552	6589428024	6602690989
327	Serpina1c	35	2	2	59	6.8	6.8	45.823	0	323.31	546000000000	3924	32100000000	Q00896	Q00896	Alpha-1-antitrypsin 1-3	4.69277e+08	4.13115e+08	5.69789e+08	5.05302e+08	3.49016e+08	4.01634e+08	4.0963e+08	2.30542e+08	5.73592e+08	6.13187e+08	5.68062e+08	561469965	652576448	334614761	3.92695e+08	3.05508e+08	2.75791e+08	4.85246e+08	4.20922e+08	4.22636e+08	5.61048e+08	5.51955e+08	553048986	4.81323e+08	4.89502e+08	3.40923e+08	6.09659e+08	8.02294e+08	5.90774e+08	5.96633e+08	4.98703e+08	587081908	3.74907e+08
328	Serpina1d	39	39	13	67.3	67.3	28.1	45.998	0	323.31	2470000000000	12217	137000000000	Q00897	Q00897	Alpha-1-antitrypsin 1-4	2291983129	9.72273e+08	1632908032	2140044466	1355858587	1232912912	2280712953	2152163597	1935435757	1743467391	2314324008	1750982264	2514112622	2347345394	2199903397	1880918305	2257970144	1311382939	1214737397	1654755241	2269375493	1732032658	2223340609	1500728749	2234953325	1582693566	1592888885	1586114002	1831641893	1700550599	1625496967	2246496294	2269375493
329	Serpina1e	32	14	14	45.8	24.7	24.7	45.891	0	323.31	733000000000	3140	48800000000	Q00898	Q00898	Alpha-1-antitrypsin 1-5	8.63206e+08	6.86321e+08	5.35954e+08	7.8184e+08	5.88982e+08	5.69789e+08	7.5847e+08	4.74897e+08	8.6104e+08	8.31837e+08	810092933	8.93743e+08	7.9795e+08	6.01283e+08	1301277909	565936114	6.46234e+08	9.43163e+08	7.8371e+08	2.50479e+08	1192996535	778472836	6.41624e+08	5.74912e+08	9.12921e+08	7.05875e+08	8.06295e+08	3.16501e+08	4.53009e+08	416569426	8.90186e+08	9.79165e+08	7.13903e+08
330	Col1a2	11	11	11	11.9	11.9	11.9	129.56	0	195.83	3305700000	284	48614000	Q3TX57;Q01149	Q3TX57;Q01149	Collagen alpha-2(I) chain	185473	280817	417427	85120.4	116847	352960	346552	326608	223585	493717	394746	444759	446981	412223	447785	216384	222453	59321	418251	624227	336665	515871	134496	160555	95975	349811	220902	39828	16747.7	457263	466734	404148	156647
331	Egfr	44	44	44	60.3	60.3	60.3	72.906	0	323.31	176000000000	3900	5028700000	Q9WVF5;Q01279;Q5SVE7	Q9WVF5;Q01279	Epidermal growth factor receptor	1.00108e+08	7.90534e+07	9.59417e+07	9.29734e+07	5.96389e+07	6.82092e+07	9.59868e+07	8.66983e+07	6.27446e+07	1.08085e+08	9.76619e+07	9.12689e+07	8.01843e+07	7.36935e+07	9.23166e+07	8.88206e+07	5.01006e+07	6.84112e+07	6.79058e+07	6.25606e+07	8.55404e+07	8.04963e+07	6.35875e+07	7.40397e+07	9.73902e+07	5.06279e+07	7.25227e+07	5.7671e+07	5.8032e+07	6.44879e+07	4.4499e+07	6.087e+07	7.10209e+07
332	Apoh	14	14	14	49.9	49.9	49.9	38.618	0	54.234	1546500000	148	70293000	Q01339;I7HJR3;I7HPW5	Q01339	Beta-2-glycoprotein 1	113678	16747.7	137137	16747.7	3.48036e+06	4.36024e+06	16747.7	16747.7	532722	411723	191642	459713	1.01632e+06	16747.7	717990	474372	531898	564260	1.01529e+06	744364	1.78602e+06	908706	708940	541146	214508	16747.7	402467	405201	288765	699019	515378	745660	107328
333	C1qc	6	6	6	26	26	26	25.991	0	78.593	18400000000	741	1532600000	Q02105	Q02105	Complement C1q subcomponent subunit C	2.39596e+07	2.53939e+07	2.74792e+07	2.29137e+07	2.68227e+07	2.81364e+07	2.11966e+07	2.84387e+07	1.59201e+07	2.06591e+07	2.42889e+07	1.67534e+07	2.70335e+07	1.96266e+07	2.57104e+07	1.72716e+07	1.61505e+07	9.10663e+06	1.99125e+07	1.60696e+07	1.73407e+07	1.46625e+07	1.34399e+07	1.53698e+07	1.76422e+07	1.67019e+07	1.21064e+07	1.41443e+07	8.645e+06	1.92327e+07	1.15975e+07	1.51267e+07	2.36314e+07
334	Glycam1	1	1	1	13.2	13.2	13.2	16.209	0	17.527	99185000	24	12398000	Q02596	Q02596	Glycosylation-dependent cell adhesion molecule 1	16747.7	16747.7	16747.7	16747.7	16747.7	16747.7	16747.7	16747.7	16747.7	16747.7	16747.7	16747.7	154573	16747.7	16747.7	16747.7	16747.7	16747.7	16747.7	16747.7	16747.7	16747.7	16747.7	16747.7	16747.7	16747.7	16747.7	16747.7	16747.7	16747.7	16747.7	16747.7	16747.7
335	Nucb1	7	7	7	20.9	20.9	20.9	53.408	0	15.248	99337000	27	3547800	Q02819;H3BK79;D3Z7D7;D3Z1N1	Q02819;H3BK79;D3Z7D7	Nucleobindin-1	16747.7	16747.7	16747.7	16747.7	16747.7	129333	16747.7	16747.7	16747.7	16747.7	16747.7	16747.7	37061.5	16747.7	16747.7	16747.7	16747.7	16747.7	16747.7	16747.7	16747.7	16747.7	16747.7	16747.7	16747.7	16747.7	16747.7	16747.7	16747.7	16747.7	16747.7	61780.4	83188.8
336	Bche	17	17	17	32.8	32.8	32.8	68.461	0	127.37	2266900000	337	87188000	Q03311	Q03311	Cholinesterase	446021	1.00654e+06	1.84328e+06	1.16913e+06	109698	875485	1.14797e+06	1.02613e+06	738918	763683	721467	1.43831e+06	1.97765e+06	1.16086e+06	621215	1.54967e+06	565897	163871	1.13663e+06	962698	1.67617e+06	426825	844506	1.32431e+06	553685	691649	541839	1.04373e+06	116550	679185	498675	534374	1.04697e+06
337	Serpina3m	33	29	17	65.3	56	45.5	47.064	0	323.31	1140000000000	8674	52000000000	Q03734	Q03734	Serine protease inhibitor A3M	7.60342e+08	5.14328e+08	5.99657e+08	7.35635e+08	5.18801e+08	4.65461e+08	6.80937e+08	632216088	8.00275e+08	7.40802e+08	7.64054e+08	6.16075e+08	6.24626e+08	6.29002e+08	6.09202e+08	6.62182e+08	6.77746e+08	7.03987e+08	6.22105e+08	6.67937e+08	8.02758e+08	6.65776e+08	7.49021e+08	8.75768e+08	6.43159e+08	5.38595e+08	7.11064e+08	6.06346e+08	9.08966e+08	6.85654e+08	6.57036e+08	6.76135e+08	6.79346e+08
338	Apoc2	7	7	7	49.5	49.5	49.5	10.741	0	157.69	3899100000	180	1949600000	Q3UJG0;Q05020;D3YXE8	Q3UJG0;Q05020	Apolipoprotein C-II	1.02123e+07	3.65415e+07	3.70578e+07	1.07051e+07	3.50636e+07	9.01128e+07	1.96054e+07	6.50215e+07	2.19454e+07	2.17994e+07	2.07886e+07	2.77138e+07	4.51082e+07	3.00448e+07	2.27408e+07	3.33496e+07	1.52439e+07	1.00595e+07	3.84204e+07	7.87448e+06	1.76684e+07	5.54539e+07	2.55301e+07	6.40688e+06	7.24646e+06	2.50657e+07	2.77846e+07	2.52169e+07	2.36484e+07	2.61732e+07	2.07886e+07	2.86115e+07	5.1882e+07
339	Serpina6	23	23	23	59.4	59.4	59.4	44.769	0	323.31	87500000000	1356	4858500000	Q06770	Q06770	Corticosteroid-binding globulin	1.93473e+07	2.42836e+07	4.79285e+07	2.20299e+07	1.85146e+07	6.38999e+07	8.60464e+07	4.71377e+07	1.7793e+07	4.29194e+07	2.78407e+07	8.01297e+07	9.4076e+07	5.38534e+07	2.96631e+07	3.09606e+07	2.45279e+07	2.38317e+07	1.94607e+07	2.09272e+07	2.22812e+07	2.54589e+07	2.70841e+07	3.62096e+07	5.90334e+07	6.89902e+07	5.65292e+07	7.92201e+07	7.76845e+07	5.02407e+07	7.93743e+07	4.54535e+07	7.31996e+07
340	Clu	38	38	38	50.2	50.2	50.2	51.655	0	323.31	336000000000	3957	17700000000	Q549A5;Q06890;E9PUU2;E9PXG5;E9Q8Y5;E9Q9B8;E9Q2G2	Q549A5;Q06890;E9PUU2;E9PXG5;E9Q8Y5;E9Q9B8	Clusterin;Clusterin;Clusterin beta chain;Clusterin alpha chain	2.63645e+08	2.17975e+08	2.27401e+08	2.44561e+08	2.07841e+08	2.32717e+08	2.31815e+08	2.04839e+08	1.74514e+08	251635086	283774453	2.86777e+08	278335955	2.70974e+08	3.32888e+08	263018563	2.28786e+08	1.78789e+08	2.22718e+08	1.9821e+08	2.60707e+08	2.33008e+08	2.10981e+08	2.72521e+08	256293482	196690600	2.56936e+08	2.7114e+08	1.75394e+08	2.36256e+08	224221801	2.27258e+08	2.45342e+08
341	Ambp	19	19	19	41.5	41.5	41.5	39.029	0	305.94	104000000000	2113	5492900000	Q07456	Q07456	Protein AMBP;Alpha-1-microglobulin;Inter-alpha-trypsin inhibitor light chain;Trypstatin	7.87222e+07	8.47932e+07	9.96744e+07	7.80994e+07	8.28314e+07	8.63564e+07	7.58007e+07	9.71069e+07	7.87467e+07	9.02732e+07	7.26148e+07	7.53603e+07	8.25329e+07	6.954e+07	8.03379e+07	6.954e+07	6.11512e+07	6.58569e+07	8.05211e+07	7.47964e+07	6.6828e+07	6.37443e+07	7.16223e+07	7.635e+07	7.20304e+07	6.66331e+07	6.57026e+07	6.31107e+07	6.35992e+07	7.95852e+07	6.98177e+07	6.60422e+07	6.6828e+07
342	Lgals3bp	7	7	7	21.8	21.8	21.8	64.49	0	56.735	401790000	87	16741000	Q07797;E9Q5X5	Q07797;E9Q5X5	Galectin-3-binding protein	477671	16747.7	367335	16747.7	642632	16747.7	139639	191575	152824	122948	239183	227909	161422	183167	511682	16747.7	213121	16747.7	219580	400003	273039	158892	196198	215703	195612	16747.7	16747.7	16747.7	16747.7	146716	203175	16747.7	202721
343	F13b	44	44	44	63.1	63.1	63.1	76.195	0	323.31	48900000000	2520	1528100000	Q07968	Q07968	Coagulation factor XIII B chain	2.69357e+07	2.71094e+07	3.04837e+07	2.70513e+07	1.41663e+07	1.56839e+07	22837318	1.85586e+07	2.10852e+07	2.63006e+07	2.11932e+07	2.33095e+07	2.55954e+07	2.42523e+07	2.79019e+07	2.32367e+07	2.09247e+07	2.22178e+07	2.53488e+07	1.27547e+07	2.14484e+07	2.0658e+07	1.89409e+07	2.13114e+07	2.66513e+07	1.89447e+07	1.67429e+07	2.80423e+07	1.71124e+07	1.64657e+07	2.0402e+07	2.19947e+07	2.14484e+07
344	Pros1	17	17	17	27	27	27	74.934	0	161.7	8945800000	851	279560000	Q3TR66;Q08761	Q3TR66;Q08761	Vitamin K-dependent protein S	2.48192e+06	2.52329e+06	4.01674e+06	2.50481e+06	831321	1.56827e+06	2.23838e+06	1.51975e+06	2.20282e+06	3.14856e+06	3.28439e+06	3.16173e+06	3.26264e+06	2.4052e+06	2.99277e+06	2.55373e+06	2.48344e+06	2.37112e+06	2.31794e+06	2.48658e+06	4.23695e+06	2.12603e+06	3.63176e+06	2.82185e+06	2.72977e+06	2.38297e+06	2.15212e+06	1.5748e+06	1.43307e+06	2.79581e+06	2.60945e+06	3.36907e+06	3.25856e+06
345	Fbln1	23	23	23	30.6	30.6	30.6	78.032	0	196.1	3217700000	424	103800000	Q08879	Q08879	Fibulin-1	1.06288e+06	2.22904e+06	2.47314e+06	2.87363e+06	1.6499e+06	2.41497e+06	671279	977966	651377	1.73336e+06	177287	1.25235e+06	330250	481639	930741	645274	515634	1.20994e+06	1.04501e+06	238619	1.04697e+06	671844	1.10069e+06	704396	1.48869e+06	1.05099e+06	1.17266e+06	1.27903e+06	597267	1.38458e+06	1.11004e+06	1.66131e+06	1.29378e+06
346	Mup3	11	11	8	68.5	68.5	60.3	21.416	0	323.31	9021800000	375	820170000	Q3KQQ2;P04939;Q80YX8	Q3KQQ2;P04939	Major urinary protein 3	1.8627e+07	1.21753e+07	7.64252e+06	1.53065e+07	4.72052e+06	9.01942e+06	1.8167e+07	1.78194e+07	4.71749e+06	1.68479e+07	1.7166e+07	2.37921e+07	1.80963e+07	1.2981e+07	29102524	1.13183e+07	8.18028e+06	2.03574e+07	1.56023e+07	7.70405e+06	1.70195e+07	1.57972e+07	1.4895e+07	1.97617e+07	1.83787e+07	1.30675e+07	1.63302e+07	1.13432e+07	1.0632e+07	4.80938e+06	4.73272e+06	1.33744e+07	1.08678e+07
347	Fgb	33	33	33	68.6	68.6	68.6	54.752	0	323.31	6815500000	769	272620000	Q3TGR2;Q8K0E8	Q3TGR2;Q8K0E8	Fibrinogen beta chain;Fibrinopeptide B;Fibrinogen beta chain	7.91393e+06	1.7822e+07	5.32879e+06	3.21231e+06	2.88563e+06	3.02543e+06	2.96227e+06	4.02857e+06	1.66618e+06	2.59854e+06	1.59846e+06	2.56496e+06	2.3026e+06	1.64214e+06	4.85306e+06	6.30942e+06	4.66256e+06	2.31794e+06	1.28923e+06	1.9061e+06	2.42105e+06	1.6615e+06	3.99048e+06	3.6408e+06	3.39639e+06	2.05021e+06	1.03031e+06	2.41408e+06	852739	2.3634e+06	2.72686e+06	3.24481e+06	3.318e+06
348	Psma1	11	11	11	44.5	44.5	44.5	29.546	0	31.384	429350000	90	25256000	Q3TS44;Q9R1P4	Q3TS44;Q9R1P4	Proteasome subunit alpha type;Proteasome subunit alpha type-1	524416	200920	16747.7	738643	16747.7	16747.7	272003	538435	364484	786504	880423	140993	973612	798230	108927	16747.7	788950	16747.7	16747.7	699266	83188.8	600929	1.04421e+06	648875	187923	16747.7	276502	94107.6	124040	300162	16747.7	644240	186415
349	Pf4	4	4	4	31.4	31.4	31.4	11.243	0	17.189	5784100000	421	1450000000	Q3TVN6;Q9Z126;A0A0J9YTR7	Q3TVN6;Q9Z126;A0A0J9YTR7	C-X-C motif chemokine;Platelet factor 4	7.59588e+06	1.0116e+07	9.78552e+06	5.71155e+06	2.88091e+07	3.06803e+07	1.88424e+07	1.42081e+07	1.40404e+07	2.03197e+07	2.00171e+07	4.36079e+06	1.9077e+07	1.78446e+07	1.43658e+07	2.64952e+07	4.09391e+07	2.9462e+07	3.0268e+07	2.17306e+07	2.60813e+07	3.08191e+07	3.11467e+07	4.4585e+07	7.85542e+06	6.99795e+06	9.4793e+06	1.0843e+07	3.90378e+06	1.12616e+07	8.57737e+06	1.48309e+07	1.33163e+07
350	Pgam1	4	4	2	20.9	20.9	12.6	28.832	0	9.3673	389240000	81	29942000	Q3U7Z6;Q9DBJ1	Q3U7Z6;Q9DBJ1	Phosphoglycerate mutase 1	334163	411340	407110	327887	1.3342e+06	1.45114e+06	386228	926408	406581	873989	381156	373829	709485	450632	495598	526066	1.53824e+06	306791	576485	908641	1.7108e+06	1.69545e+06	330443	1.22905e+06	340392	16747.7	232605	142871	147404	354571	178639	518148	401352
351	Hp	33	33	33	69.2	69.2	69.2	38.752	0	323.31	788000000000	6011	39400000000	Q3UBS3;Q61646	Q3UBS3;Q61646	Haptoglobin;Haptoglobin alpha chain;Haptoglobin beta chain	1.55842e+07	3.16022e+07	5.10252e+07	3.00448e+07	1.15074e+08	1.26106e+08	3.13148e+07	2.95943e+07	7.35545e+07	130892165	3.54761e+08	3.07885e+08	3.42389e+08	1.93047e+08	2.36658e+08	5.29726e+08	183805676	1.10498e+08	2.08972e+08	3.90157e+08	5.27776e+08	4.04116e+08	3.65618e+08	6.91814e+08	7.90792e+07	2.69418e+08	3.20773e+08	1.11028e+07	7.49287e+07	1204190543	3.1674e+08	5.57194e+08	2.30305e+08
352	Fgg	22	22	22	54.6	54.6	54.6	49.391	0	323.31	12800000000	896	513420000	Q3UEM7;Q3UER8;Q8VCM7	Q3UEM7;Q3UER8;Q8VCM7	Fibrinogen gamma chain	4.32653e+06	2.21535e+07	7.48835e+06	3.27478e+06	2.04168e+06	2.84861e+06	7.67338e+06	4.50711e+06	6.70108e+06	5.27064e+06	2.20004e+06	4.00263e+06	5.38958e+06	5.03588e+06	9.09282e+06	9.44758e+06	7.24247e+06	4.10254e+06	1.43307e+06	1.71172e+06	3.72559e+06	2.25196e+06	1.09364e+07	5.70247e+06	5.96294e+06	4.46566e+06	3.09153e+06	4.67654e+06	2.31794e+06	4.97649e+06	5.22114e+06	5.78607e+06	6.5223e+06
353	Aldob	7	6	6	31.9	29.9	29.9	39.507	0	15.274	48195000	10	2536600	Q3UER1;Q91Y97	Q3UER1;Q91Y97	Fructose-bisphosphate aldolase;Fructose-bisphosphate aldolase B	16747.7	16747.7	16747.7	16747.7	16747.7	16747.7	16747.7	272532	16747.7	16747.7	16747.7	257304	638147	125246	16747.7	16747.7	16747.7	16747.7	16747.7	421495	16747.7	232497	381043	16747.7	16747.7	16747.7	16747.7	16747.7	16747.7	16747.7	16747.7	16747.7	16747.7
354	Psma5;Gm8394	8	8	8	55.2	55.2	55.2	26.411	0	49.115	652600000	107	59327000	Q3UPK6;Q9Z2U1;D3YX79;A0A0G2JF97	Q3UPK6;Q9Z2U1;D3YX79	Proteasome subunit alpha type;Proteasome subunit alpha type-5	16747.7	16747.7	16747.7	16747.7	16747.7	16747.7	303137	377706	16747.7	434837	342524	980115	622250	422918	300481	239123	469027	360622	16747.7	16747.7	16747.7	960126	732056	2.26254e+06	224121	971045	898664	1.24332e+06	989502	1.56232e+06	420737	1.58644e+06	1.22857e+06
355	Agt	17	17	17	40	40	40	52.67	0	323.31	26800000000	1103	1409400000	Q3UTR7;P11859	Q3UTR7;P11859	Angiotensinogen;Angiotensin-1;Angiotensin-2;Angiotensin-3;Angiotensin-4;Angiotensin 1-9;Angiotensin 1-7;Angiotensin 1-5;Angiotensin 1-4	1.52868e+07	1.70801e+07	2.27773e+07	1.38401e+07	1.28471e+07	1.10295e+07	2.00098e+07	1.36591e+07	1.52819e+07	1.81525e+07	2.37593e+07	1.90486e+07	2.28396e+07	1.41265e+07	2.52561e+07	1.24692e+07	1.25537e+07	1.57203e+07	1.52685e+07	1.40014e+07	2.36314e+07	1.7136e+07	1.19054e+07	2.01677e+07	1.38862e+07	1.02852e+07	1.24189e+07	1.1595e+07	1.26155e+07	1.38189e+07	1.28125e+07	1.71092e+07	1.73407e+07
356	Cfhr2	21	10	10	60.2	33.7	33.7	37.932	0	125.18	6123400000	497	408230000	Q4LDF6;Q61405	Q4LDF6;Q61405		8.85127e+06	1.32512e+07	1.33762e+07	7.89352e+06	9.63727e+06	9.66442e+06	9.31085e+06	7.63561e+06	7.29837e+06	8.47098e+06	9.80202e+06	6.684e+06	9.87807e+06	7.80971e+06	1.3512e+07	1.03405e+07	8.96968e+06	7.99491e+06	1.22458e+07	4.00917e+06	8.86895e+06	7.2814e+06	1.04857e+07	8.79833e+06	4.33842e+06	3.87275e+06	4.43816e+06	3.92621e+06	4.42061e+06	2.84428e+06	2.45731e+06	4.61872e+06	4.47909e+06
357	Tfrc	19	19	19	28.4	28.4	28.4	85.73	0	85.288	1398500000	340	36804000	Q542D9;Q62351;Q8C872	Q542D9;Q62351;Q8C872	Transferrin receptor protein 1	240777	340466	697450	491558	95937.1	144353	410141	241092	631799	422051	473407	733351	1.79298e+06	466581	344263	272570	928934	199651	300448	547416	656543	547216	894681	225174	612285	481167	243329	857682	173343	309900	1.31292e+06	568941	826836
358	Psma7;Psma8	6	6	6	29.8	29.8	29.8	27.855	0	23.577	539620000	112	38544000	Q542H2;Q9Z2U0;Q9CWH6	Q542H2;Q9Z2U0;Q9CWH6	Proteasome subunit alpha type;Proteasome subunit alpha type-7;Proteasome subunit alpha type-7-like	818596	565534	493899	16747.7	757035	486005	822788	456972	464248	539599	1.2042e+06	1.15206e+06	1.55257e+06	1.20994e+06	1.14016e+06	342841	499540	652117	348942	814045	1.10262e+06	935225	308383	1.59401e+06	16747.7	302264	359104	222685	348942	381156	343326	306264	283703
359	Ctsz	6	6	6	19.3	19.3	19.3	33.996	0.0022831	6.4558	261540000	55	20118000	Q545I6;Q9WUU7	Q545I6;Q9WUU7	Cathepsin Z	16747.7	303834	296685	16747.7	16747.7	16747.7	220804	414645	16747.7	16747.7	679185	16747.7	196515	634255	237805	16747.7	16747.7	16747.7	16747.7	16747.7	16747.7	301781	16747.7	275570	590685	337405	16747.7	16747.7	16747.7	901859	16747.7	275151	715278
360	Hgfac	23	23	23	41.7	41.7	41.7	70.567	0	323.31	24700000000	1478	1176300000	Q545J3;Q9R098;A0A0J9YUY6	Q545J3;Q9R098	Hepatocyte growth factor activator;Hepatocyte growth factor activator short chain;Hepatocyte growth factor activator long chain	1.4136e+07	1.94471e+07	1.79322e+07	1.41138e+07	1.77093e+07	2.03847e+07	1.2838e+07	1.08036e+07	1.17579e+07	1.55558e+07	1.35057e+07	1.83938e+07	2.24529e+07	1.46838e+07	1.76154e+07	1.31891e+07	1.5835e+07	1.15894e+07	1.67294e+07	9.61493e+06	1.18158e+07	1.68145e+07	2.25895e+07	1.76227e+07	1.32581e+07	9.39801e+06	9.9331e+06	8.25102e+06	8.20727e+06	7.58953e+06	8.783e+06	9.87134e+06	1.26984e+07
361	Gda	3	3	3	6.2	6.2	6.2	51.012	0.0020284	3.8895	19193000	11	738210	Q548F2;Q9R111;D3YU09	Q548F2;Q9R111;D3YU09	Guanine deaminase	16747.7	16747.7	16747.7	16747.7	16747.7	16747.7	16747.7	97193.4	16747.7	16747.7	16747.7	98081.2	168577	67489.8	16747.7	16747.7	114372	16747.7	16747.7	16747.7	16747.7	16747.7	16747.7	16747.7	16747.7	16747.7	16747.7	16747.7	16747.7	16747.7	16747.7	16747.7	16747.7
362	Mup1;Mup7	19	1	0	82.2	11.7	0	20.6	0	55.748	950080000	78	86371000	Q58EV3;E9QA79;L7MUC7;A2CEK9;B5TE77;P11591	Q58EV3;E9QA79;L7MUC7		3.53708e+06	3.04769e+06	16747.7	2.93357e+06	16747.7	16747.7	3.17059e+06	16747.7	16747.7	16747.7	2.10575e+06	218153	16747.7	16747.7	6.75896e+06	16747.7	16747.7	5.53897e+06	16747.7	16747.7	1.56549e+07	1.41306e+06	1.22833e+06	16747.7	2.87729e+06	16747.7	1.70898e+06	4.94871e+06	16747.7	249367	16747.7	1.77047e+06	1.07506e+06
363	Mup20	8	6	6	51.4	43.1	43.1	20.93	0	42.514	339840000	45	30894000	Q5FW60	Q5FW60	Major urinary protein 20	1.76361e+06	1.71091e+06	543765	1.71719e+06	886707	981636	1.88609e+06	670676	16747.7	1.6321e+06	535359	567457	16747.7	543765	2.88342e+06	508054	16747.7	854315	311575	16747.7	1.12945e+06	16747.7	16747.7	16747.7	318215	16747.7	16747.7	16747.7	16747.7	16747.7	16747.7	16747.7	16747.7
364	Clhc1	1	1	1	1.8	1.8	1.8	69.413	0.005848	3.1461	56060000	14	1515100	Q5M6W3	Q5M6W3	Clathrin heavy chain linker domain-containing protein 1	16747.7	16747.7	110585	16747.7	16747.7	16747.7	113908	16747.7	16747.7	16747.7	67830.6	16747.7	16747.7	16747.7	16747.7	16747.7	16747.7	16747.7	16747.7	16747.7	16747.7	16747.7	16747.7	16747.7	16747.7	16747.7	16747.7	16747.7	16747.7	16747.7	16747.7	16747.7	16747.7
365	Serpinf2	27	27	27	48.7	48.7	48.7	54.971	0	323.31	96400000000	2621	5072400000	Q5ND36;Q61247;Q5ND35;E9PXE0	Q5ND36;Q61247;Q5ND35	Alpha-2-antiplasmin	7.62269e+07	6.6457e+07	8.28645e+07	5.96661e+07	3.07299e+07	3.28662e+07	8.32768e+07	7.14208e+07	6.45879e+07	7.68871e+07	8.75854e+07	8.25202e+07	104714213	8.08737e+07	8.28721e+07	5.96447e+07	6.45558e+07	5.5759e+07	5.59842e+07	6.0883e+07	7.31996e+07	7.80389e+07	6.94888e+07	8.12995e+07	7.41274e+07	5.21863e+07	5.31345e+07	6.71046e+07	5.10498e+07	6.84911e+07	5.66367e+07	6.82689e+07	6.8984e+07
366	Orm1	20	20	14	51.7	51.7	30.9	23.895	0	323.31	129000000000	3563	12900000000	Q60590;J3JRU4;Q63805	Q60590	Alpha-1-acid glycoprotein 1	9.65485e+07	7.36345e+07	8.02812e+07	8.07338e+07	1.39829e+08	1.82677e+08	1.03583e+08	8.37051e+07	7.60209e+07	7.92987e+07	1.34061e+08	1.16956e+08	1.36637e+08	1.19938e+08	1.11833e+08	1.1373e+08	1.06723e+08	7.59282e+07	8.64258e+07	115382547	9.21606e+07	1.06322e+08	1.33835e+08	1.25884e+08	1.4116e+08	9.86177e+07	1.24203e+08	9.17895e+07	9.77341e+07	2.66549e+08	1.26161e+08	1.57387e+08	1.20141e+08
367	Psmb6	2	2	2	8.8	8.8	8.8	25.378	0.0021008	4.3269	143110000	38	13010000	Q60692	Q60692	Proteasome subunit beta type-6	16747.7	211879	242863	16747.7	16747.7	16747.7	293159	349972	16747.7	350854	16747.7	360715	16747.7	256437	16747.7	16747.7	855070	113720	16747.7	16747.7	481986	271510	16747.7	285766	441618	16747.7	16747.7	16747.7	16747.7	16747.7	331840	223285	212433
368	Mertk	4	4	4	7.1	7.1	7.1	110.16	0	12.961	167730000	35	4090900	Q60805	Q60805	Tyrosine-protein kinase Mer	147634	234823	161828	184669	16747.7	16747.7	148097	16747.7	16747.7	16747.7	126136	200235	182676	131476	16747.7	16747.7	16747.7	16747.7	16747.7	16747.7	16747.7	16747.7	16747.7	16747.7	16747.7	16747.7	16747.7	16747.7	16747.7	16747.7	16747.7	16747.7	16747.7
369	Pla2g7	11	11	11	35.7	35.7	35.7	49.258	0	114.43	2678400000	316	140970000	Q60963;E9Q330;E9Q4T5;E9Q6J0	Q60963	Platelet-activating factor acetylhydrolase	4.63565e+06	4.80516e+06	3.64789e+06	2.45591e+06	2.82379e+06	2.79443e+06	1.97057e+06	2.48819e+06	1.46974e+06	1.99713e+06	1.77943e+06	2.76457e+06	3.31835e+06	1.30127e+06	3.09887e+06	2.95683e+06	2.53169e+06	2.53274e+06	2.12784e+06	1.35071e+06	4.31706e+06	2.95765e+06	3.76623e+06	2.39073e+06	2.42195e+06	651377	425094	938269	138233	1.10448e+06	975038	187413	950355
370	Adipoq	5	5	5	20.6	20.6	20.6	26.809	0	63.684	7490300000	315	680930000	Q60994;E9PWU4	Q60994	Adiponectin	4.16774e+06	4.35287e+06	8.5625e+06	4.87539e+06	1.77073e+06	2.23141e+06	2.45053e+06	1.37502e+06	3.28889e+06	3.46155e+06	2.90194e+06	1.78519e+06	6.00815e+06	4.31498e+06	3.48441e+06	4.7904e+06	1.79688e+06	3.21566e+06	4.86526e+06	3.71659e+06	6.27262e+06	3.79142e+06	7.31529e+06	1.63134e+06	4.26102e+06	4.62798e+06	2.42867e+06	6.38454e+06	4.7718e+06	2.75182e+06	1.08736e+07	7.17828e+06	7.92227e+06
371	Cfi	38	38	38	61.9	61.9	61.9	67.26	0	323.31	64600000000	1950	1794200000	Q61129;A0A0G2JF07	Q61129	Complement factor I;Complement factor I heavy chain;Complement factor I light chain	3.09662e+07	2.77527e+07	2.80635e+07	3.11936e+07	4.29861e+07	4.52285e+07	2.6224e+07	2.72324e+07	2.06414e+07	2.5848e+07	3.12279e+07	2.66023e+07	2.51768e+07	2.11896e+07	3.02816e+07	3.03353e+07	1.97332e+07	2.67353e+07	2.5848e+07	1.54655e+07	2.56228e+07	2.58915e+07	3.61704e+07	2.85271e+07	2.61318e+07	2.15049e+07	2.90524e+07	3.17569e+07	1.59244e+07	2.72846e+07	2.12141e+07	2.15838e+07	2.31347e+07
372	Prdx2	5	5	5	33.3	33.3	33.3	21.778	0	9.232	198380000	56	15260000	Q61171;D3Z4A4	Q61171;D3Z4A4	Peroxiredoxin-2	16747.7	16747.7	340731	316678	16747.7	16747.7	526920	16747.7	16747.7	376777	1.38458e+06	16747.7	857925	197787	1.19054e+06	16747.7	107591	16747.7	16747.7	16747.7	325458	332763	141645	94160.8	415384	16747.7	16747.7	312061	16747.7	16747.7	16747.7	16747.7	16747.7
373	Lcp1	18	18	18	40.4	40.4	40.4	70.148	0	86.109	1329400000	208	35930000	Q61233;B1AX58;Q99K51	Q61233	Plastin-2	106808	166352	232566	177076	220497	161828	420626	184186	570071	989502	1.07718e+06	711921	1.68979e+06	597267	1.85002e+06	1.4728e+06	1.00134e+06	696032	639064	3.44174e+06	5.90579e+06	4.45829e+06	2.89901e+06	2.73249e+06	276217	135201	134288	134894	16747.7	368269	287647	244301	139995
374	Apoc4	5	5	5	41.9	41.9	41.9	14.288	0	41.066	7092500000	223	1773100000	Q61268	Q61268	Apolipoprotein C-IV	2.13201e+07	2.16803e+07	2.43131e+07	1.8781e+07	2.74892e+07	2.88027e+07	2.57582e+07	2.41046e+07	1.43115e+07	1.49778e+07	1.55121e+07	2.16663e+07	17134295	9.86605e+06	1.69566e+07	9.9148e+06	1.82731e+07	1.89491e+07	8.44298e+06	1.02268e+07	8.27452e+06	1.84692e+07	2.17221e+07	1.90041e+07	2.78275e+07	2.10852e+07	3.60982e+07	2.30175e+07	2.95943e+07	1.97337e+06	1.80465e+07	2.00025e+07	2.65901e+07
375	Itih1	62	62	62	61.5	61.5	61.5	101.07	0	323.31	243000000000	5213	5782700000	Q61702;F8WJ05	Q61702;F8WJ05	Inter-alpha-trypsin inhibitor heavy chain H1	8.65624e+07	7.62185e+07	9.24784e+07	7.55316e+07	4.73945e+07	4.12948e+07	8.9397e+07	8.11836e+07	8.15278e+07	1.03924e+08	9.10655e+07	9.42719e+07	9.73697e+07	6.54761e+07	7.77524e+07	7.41802e+07	5.96759e+07	5.99922e+07	5.99922e+07	6.4305e+07	8.03926e+07	7.34859e+07	6.52977e+07	7.88031e+07	8.71512e+07	5.93062e+07	7.47804e+07	7.64922e+07	6.79058e+07	9.41685e+07	9.4818e+07	9.11998e+07	8.88085e+07
376	Itih3	42	42	42	49.8	49.8	49.8	99.357	0	323.31	179000000000	3562	4829200000	Q61704;E9PVS1;F6ZXJ7	Q61704;E9PVS1	Inter-alpha-trypsin inhibitor heavy chain H3	5.53112e+07	4.99511e+07	4.94581e+07	5.1345e+07	5.07001e+07	6.03259e+07	4.25966e+07	5.3097e+07	3.04008e+07	7.25707e+07	7.95852e+07	6.36872e+07	6.2324e+07	4.6883e+07	6.2905e+07	6.72611e+07	4.85535e+07	5.79169e+07	5.41044e+07	7.73101e+07	6.14648e+07	5.90789e+07	5.34453e+07	6.24371e+07	3.93019e+07	4.74205e+07	6.0321e+07	3.65704e+07	3.22659e+07	1.17896e+08	5.47134e+07	6.25182e+07	5.99922e+07
377	A2m;Pzp	134	134	132	81.4	81.4	80.9	165.85	0	323.31	6630000000000	43380	105000000000	Q61838;D3YW52;D3YUI3	Q61838;D3YW52	Alpha-2-macroglobulin;Alpha-2-macroglobulin 165 kDa subunit;Alpha-2-macroglobulin 35 kDa subunit	1692446537	1349761637	1283445504	1441155878	1079984317	9.94775e+08	1321277447	1163843126	1238814053	1523506340	1487290642	1529847828	1548447166	1337768294	1175695159	1226934124	1472127294	1766671207	1083018630	1453771065	1475122739	1513857043	1181531977	1716475197	1309952408	1238814053	1247523455	1390940087	1214737397	1487290642	1431488165	1469113859	1475122739
378	Postn	26	26	26	36.9	36.9	36.9	93.142	0	230.52	4459300000	600	111480000	Q62009;F7C9H0	Q62009	Periostin	1.43854e+06	2.99077e+06	2.28621e+06	1.38276e+06	350509	724945	2.70868e+06	1.7072e+06	2.58429e+06	3.09973e+06	5.38106e+06	5.77284e+06	4.84284e+06	2.15371e+06	4.28526e+06	1.01806e+06	1.39348e+06	332340	2.22984e+06	861116	1.41985e+06	1.80207e+06	1.128e+06	884096	1.03771e+06	1.02084e+06	954555	710362	198508	1.84972e+06	1.34481e+06	1.84318e+06	1.52817e+06
379	Ces3a;Ces3b	2	2	2	5.8	5.8	5.8	63.317	0.001992	3.6732	113180000	35	5659000	Q63880;Q8VCU1	Q63880;Q8VCU1	Carboxylesterase 3A;Carboxylesterase 3B	192733	16747.7	16747.7	16747.7	16747.7	16747.7	163561	130183	16747.7	134948	16747.7	149279	138893	16747.7	128997	16747.7	16747.7	16747.7	16747.7	16747.7	127271	143144	16747.7	105427	134213	56659.6	87347.4	16747.7	16747.7	162258	70215.2	16747.7	16747.7
380	Sord	3	3	3	7.6	7.6	7.6	38.249	0.0020367	3.9161	24549000	14	1292000	Q64442	Q64442	Sorbitol dehydrogenase	75335	16747.7	16747.7	16747.7	16747.7	16747.7	95301.5	102973	16747.7	16747.7	94806.9	73096.2	79329.8	88625.5	16747.7	16747.7	16747.7	16747.7	16747.7	47112.9	16747.7	16747.7	16747.7	118363	16747.7	16747.7	16747.7	16747.7	16747.7	16747.7	16747.7	16747.7	16747.7
381	Azgp1	26	26	26	62.5	62.5	62.5	35.332	0	323.31	134000000000	2969	8400100000	Q64726	Q64726	Zinc-alpha-2-glycoprotein	1.16518e+08	1.13775e+08	1.27649e+08	1.13008e+08	110560272	1.20246e+08	1.20874e+08	1.29208e+08	1.02809e+08	9.99983e+07	1.28373e+08	1.21844e+08	1.20934e+08	1.30604e+08	115967955	8.52667e+07	8.24795e+07	9.24784e+07	9.77341e+07	8.83285e+07	1.25494e+08	1.18423e+08	9.01249e+07	1.03757e+08	1.5636e+08	1.11833e+08	1.09406e+08	1.41855e+08	1.0188e+08	1.01246e+08	9.85579e+07	1.29544e+08	115307557
382	Vcl	11	11	11	16	16	16	116.72	0	22.706	216080000	61	2881100	Q64727	Q64727	Vinculin	16747.7	16747.7	55086.7	62827.2	29589.5	56880.9	89599.4	62708	48518.1	87327.6	53562.5	45508.8	51929.4	16747.7	28505.6	16747.7	16747.7	16747.7	95748.7	54594.4	100944	16747.7	16747.7	16747.7	90223.3	16747.7	16747.7	16747.7	16747.7	16747.7	28774.8	16747.7	53929.9
383	A2mp	11	9	9	7.5	6.5	6.5	164.35	0	14.74	140360000	36	1871400	Q6GQT1	Q6GQT1	Alpha-2-macroglobulin-P	38148.6	16747.7	16747.7	103198	16747.7	16747.7	61443.9	47312.6	16747.7	16747.7	16747.7	52426	252335	81959.4	16747.7	16747.7	16747.7	16747.7	16747.7	16747.7	16747.7	16747.7	16747.7	16747.7	16747.7	16747.7	29130.9	16747.7	16747.7	106317	85618.3	16747.7	38259.3
384	Kng2	35	31	5	70.4	70.4	7.2	47.887	0	323.31	92700000000	2414	4414800000	Q6S9I0;Q6S9I2;E0CYI5	Q6S9I0;Q6S9I2		5.9051e+07	6.89129e+07	7.765e+07	6.66641e+07	9.32166e+07	1.01412e+08	6.93384e+07	1.00779e+08	5.06279e+07	74541203	6.84911e+07	5.72699e+07	8.78306e+07	9.24784e+07	6.65262e+07	7.68399e+07	7.28393e+07	6.17679e+07	8.32768e+07	6.61495e+07	6.48701e+07	7.56401e+07	5.20836e+07	8.36801e+07	5.71066e+07	3.04008e+07	5.16391e+07	4.77514e+07	4.61654e+07	6.11344e+07	3.37957e+07	4.06742e+07	4.74885e+07
385	Fgl1	4	4	4	21	21	21	36.439	0	13.413	46487000	15	2734600	Q71KU9	Q71KU9	Fibrinogen-like protein 1	16747.7	16747.7	16747.7	16747.7	16747.7	16747.7	16747.7	16747.7	16747.7	16747.7	16747.7	16747.7	16747.7	16747.7	16747.7	16747.7	16747.7	16747.7	16747.7	217333	16747.7	16747.7	16747.7	236053	16747.7	16747.7	16747.7	16747.7	16747.7	551714	16747.7	16747.7	16747.7
386	Ubr5	2	2	2	0.8	0.8	0.8	308.35	0.005814	3.0752	1438100000	20	10978000	Q80TP3;E9Q2H1	Q80TP3;E9Q2H1	E3 ubiquitin-protein ligase UBR5	16747.7	16747.7	16747.7	655286	706272	16747.7	16747.7	16747.7	16747.7	1.77036e+06	1.0223e+06	673506	604366	16747.7	980822	16747.7	1.75896e+06	16747.7	16747.7	16747.7	16747.7	16747.7	16747.7	16747.7	16747.7	16747.7	16747.7	530051	660101	16747.7	16747.7	16747.7	16747.7
387	F12	23	23	23	40.4	40.4	40.4	65.701	0	323.31	106000000000	2693	4600600000	Q80YC5;E9Q698	Q80YC5	Coagulation factor XII;Coagulation factor XIIa heavy chain;Coagulation factor XIIa light chain	6.38626e+07	6.24656e+07	7.0618e+07	5.7789e+07	4.58198e+07	4.25296e+07	8.08287e+07	9.02732e+07	6.89902e+07	8.69318e+07	7.04574e+07	7.12117e+07	7.34216e+07	7.83756e+07	7.30485e+07	6.12632e+07	5.78617e+07	6.3803e+07	7.76845e+07	5.74351e+07	7.10209e+07	6.93936e+07	8.36965e+07	8.9844e+07	6.21779e+07	5.72699e+07	6.38357e+07	7.39392e+07	6.16664e+07	4.87186e+07	4.87472e+07	5.93577e+07	5.82605e+07
388	Thbs1	75	75	74	58.2	58.2	57.6	129.69	0	323.31	128000000000	3846	2001900000	Q80YQ1;P35441;Q03350	Q80YQ1;P35441	Thrombospondin-1	2.98045e+07	2.96959e+07	3.10614e+07	2.94313e+07	3.20223e+07	3.12506e+07	2.96392e+07	3.02188e+07	2.85271e+07	3.25431e+07	3.61969e+07	2.99133e+07	3.96521e+07	2.9462e+07	3.48156e+07	2.49545e+07	2.87796e+07	2.81072e+07	2.21382e+07	2.05248e+07	2.51755e+07	2.91475e+07	2.01422e+07	3.44827e+07	2.52154e+07	2.24253e+07	2.65369e+07	2.41208e+07	1.99125e+07	2.32619e+07	1.95491e+07	2.74275e+07	2.41626e+07
389	Tnc	14	14	14	7.4	7.4	7.4	231.8	0	76.988	729860000	99	7524300	Q80YX1;Q80YX0	Q80YX1	Tenascin	16747.7	16747.7	16747.7	16747.7	16747.7	16747.7	16747.7	16747.7	16747.7	16747.7	16747.7	16747.7	16747.7	16747.7	16747.7	16747.7	16747.7	16747.7	16747.7	16747.7	16747.7	16747.7	16747.7	16747.7	16747.7	16747.7	16747.7	16747.7	16747.7	16747.7	16747.7	46788	28312.1
390	C8b	42	42	42	60.4	60.4	60.4	66.229	0	323.31	114000000000	3586	3260800000	Q8BH35	Q8BH35	Complement component C8 beta chain	7.18166e+07	5.88936e+07	6.8544e+07	6.4698e+07	3.40484e+07	4.00887e+07	5.49143e+07	3.963e+07	3.44001e+07	8.17515e+07	6.44879e+07	5.90919e+07	5.43441e+07	4.97244e+07	6.46258e+07	5.24098e+07	3.41701e+07	5.06221e+07	4.61654e+07	2.65527e+07	5.64205e+07	3.89763e+07	5.06329e+07	3.80642e+07	4.7937e+07	2.60501e+07	4.15249e+07	3.86451e+07	2.48264e+07	2.95498e+07	2.55203e+07	3.21019e+07	3.90363e+07
391	F13a1	11	11	11	18.3	18.3	18.3	83.206	0	21.914	298410000	72	7852800	Q8BH61	Q8BH61	Coagulation factor XIII A chain	292051	315624	185155	231569	16747.7	16747.7	231569	16747.7	121459	179397	16747.7	16747.7	175612	112548	16747.7	162786	28343.9	16747.7	16747.7	291016	148563	16747.7	16747.7	16747.7	68721.9	279960	16747.7	289960	209360	16747.7	398594	164918	61555.4
392	Ces2e	23	23	19	54.7	54.7	47.4	62.317	0	185.75	4671400000	605	212340000	Q8BK48;Q6PDB7;F6Z9B9;Q08ED5;Q9D998;Q6AW46	Q8BK48	Pyrethroid hydrolase Ces2e	2.63015e+06	3.30814e+06	4.41661e+06	3.03775e+06	1.02133e+06	956550	2.49792e+06	2.30123e+06	4.20093e+06	5.56216e+06	6.75301e+06	4.82007e+06	4.103e+06	3.86186e+06	3.75511e+06	1.13812e+06	1.6864e+06	1.39048e+06	2.46794e+06	886412	4.1573e+06	4.14881e+06	1.71615e+06	3.1301e+06	3.26823e+06	2.70868e+06	3.7128e+06	1.53339e+06	1.13663e+06	3.2252e+06	777929	5.2626e+06	1.49514e+06
393	Qsox1	38	38	38	46.9	46.9	46.9	82.784	0	323.31	28400000000	1863	661480000	Q8BND5	Q8BND5	Sulfhydryl oxidase 1	9.11253e+06	1.29208e+07	1.72303e+07	8.86416e+06	1.00894e+07	1.05327e+07	1.16628e+07	8.95142e+06	1.00777e+07	1.2119e+07	1.32022e+07	1.41084e+07	1.528e+07	1.0436e+07	1.65882e+07	1.41551e+07	8.39048e+06	7.62256e+06	1.33163e+07	7.39437e+06	9.84796e+06	1.02792e+07	1.37714e+07	1.11951e+07	8.4062e+06	4.99462e+06	8.03543e+06	7.37109e+06	3.81754e+06	8.05989e+06	5.42731e+06	6.52198e+06	5.46527e+06
394	Efemp1	16	16	16	45	45	45	54.952	0	286.45	5766300000	581	240260000	Q8BPB5;F6ZFS0	Q8BPB5	EGF-containing fibulin-like extracellular matrix protein 1	2.04413e+06	3.46517e+06	4.09286e+06	3.82285e+06	6.377e+06	8.81307e+06	3.42859e+06	2.64448e+06	3.09789e+06	4.65142e+06	4.49643e+06	4.07252e+06	3.57366e+06	3.94413e+06	4.36053e+06	4.52499e+06	3.28128e+06	3.28622e+06	5.30179e+06	1.52562e+06	4.54964e+06	3.2198e+06	2.5338e+06	4.05863e+06	2.02421e+06	2.33633e+06	1.82877e+06	2.46321e+06	2.22984e+06	643422	705270	1.11544e+06	1.94307e+06
395	Pm20d1	3	3	3	9.3	9.3	9.3	55.662	0.0020408	3.9177	24381000	11	870770	Q8C165;F7B8J4	Q8C165;F7B8J4	Probable carboxypeptidase PM20D1	16747.7	16747.7	16747.7	16747.7	16747.7	16747.7	16747.7	16747.7	16747.7	52595.4	16747.7	87012.4	16747.7	16747.7	16747.7	16747.7	16747.7	16747.7	16747.7	16747.7	139995	60260	16747.7	16747.7	16747.7	16747.7	16747.7	16747.7	16747.7	16747.7	16747.7	16747.7	16747.7
396	Dpep2	4	4	4	13.2	13.2	13.2	52.664	0	8.3235	30846000	10	1233900	Q8C255	Q8C255	Dipeptidase 2	16747.7	16747.7	16747.7	16747.7	16747.7	16747.7	16747.7	16747.7	16747.7	16747.7	16747.7	16747.7	16747.7	16747.7	16747.7	16747.7	16747.7	76048.8	16747.7	159609	16747.7	123797	16747.7	124953	16747.7	16747.7	16747.7	16747.7	16747.7	16747.7	16747.7	16747.7	16747.7
397	Apoa5	3	3	3	10.9	10.9	10.9	41.262	0	8.1669	100160000	46	4769600	Q8C7G5	Q8C7G5	Apolipoprotein A-V	16747.7	16747.7	130787	16747.7	16747.7	16747.7	16747.7	160933	80287.9	16747.7	16747.7	16747.7	16747.7	16747.7	96490.8	16747.7	16747.7	145357	57559.8	143015	16747.7	322104	16747.7	16747.7	16747.7	16747.7	16747.7	16747.7	16747.7	16747.7	16747.7	16747.7	16747.7
398	Setd1b	2	2	2	1.3	1.3	1.3	215.35	0.0022173	5.369	438350000	81	5767700	Q8CFT2	Q8CFT2	Histone-lysine N-methyltransferase SETD1B	16747.7	16747.7	97551.2	130484	156988	237368	126989	16747.7	16747.7	16747.7	16747.7	16747.7	86087.7	145357	182284	122732	16747.7	16747.7	16747.7	16747.7	16747.7	16747.7	46916.7	16747.7	235392	313364	210999	212605	181815	184542	265611	316992	133375
399	C1ra;C1rb	45	45	45	72.1	72.1	72.1	80.072	0	323.31	70800000000	3471	2083200000	Q8CG16;Q8CFG9;Q3UZ09	Q8CG16;Q8CFG9	Complement C1r-A subcomponent;Complement C1r-A subcomponent heavy chain;Complement C1r-A subcomponent light chain;Complement C1r-B subcomponent;Complement C1r-B subcomponent heavy chain;Complement C1r-B subcomponent light chain	3.66299e+07	3.76131e+07	4.02153e+07	3.83437e+07	2.15265e+07	2.35814e+07	3.19408e+07	3.75876e+07	2.50657e+07	3.51771e+07	3.53257e+07	2.52521e+07	3.08252e+07	2.7769e+07	3.75843e+07	2.84323e+07	2.25733e+07	2.74396e+07	3.09026e+07	2.51142e+07	2.83512e+07	2.74707e+07	2.45678e+07	2.96163e+07	3.1882e+07	2.78636e+07	2.71754e+07	3.0572e+07	2.12416e+07	2.4806e+07	1.52621e+07	3.03428e+07	2.77545e+07
400	Btd	16	16	16	39.6	39.6	39.6	58.154	0	182.61	4274100000	608	203530000	Q8CIF4	Q8CIF4	Biotinidase	1.5106e+06	2.12573e+06	1.36002e+06	2.60629e+06	969994	658827	2.59419e+06	1.48504e+06	2.92907e+06	1.45887e+06	3.41428e+06	2.91332e+06	4.39342e+06	1.8529e+06	3.41056e+06	2.50037e+06	2.578e+06	1.60434e+06	2.52104e+06	2.30137e+06	3.45872e+06	2.50703e+06	3.23086e+06	2.3495e+06	1.74284e+06	1.58573e+06	1.14681e+06	1.94281e+06	679577	2.40596e+06	2.31794e+06	2.00997e+06	1.56627e+06
401	H2-Q4	18	14	7	46.3	40.4	30.8	39.617	0	51.249	2059200000	289	102960000	Q8HWB2;Q792Z7;P01899;P01900;P01895;P14427;P01902	Q8HWB2		1.27682e+06	4.5315e+06	4.16641e+06	856066	784202	1.72594e+06	801847	2.08008e+06	1.05099e+06	2.89884e+06	1.29328e+06	1.68051e+06	2.10345e+06	1.46407e+06	1.93674e+06	1.70992e+06	1.7205e+06	997505	803496	678767	545552	1.38183e+06	1.49816e+06	2.98162e+06	1.12191e+06	1.08103e+06	1.00372e+06	831176	537077	1.13087e+06	162735	724258	805908
402	C8a	52	52	52	77.3	77.3	77.3	66.08	0	323.31	144000000000	4625	4109500000	Q8K182;A2A997;A2A998	Q8K182;A2A997;A2A998	Complement component C8 alpha chain	8.12623e+07	7.12117e+07	7.50883e+07	7.32609e+07	5.75871e+07	5.85038e+07	7.35545e+07	5.82003e+07	5.72699e+07	9.65692e+07	7.46647e+07	8.79149e+07	8.49592e+07	6.21065e+07	6.8768e+07	7.18823e+07	5.29845e+07	7.88726e+07	7.49287e+07	3.8332e+07	7.53741e+07	6.74004e+07	7.86383e+07	7.20041e+07	6.98639e+07	4.89572e+07	5.85313e+07	4.48104e+07	5.41044e+07	5.30626e+07	4.3168e+07	6.42396e+07	6.31948e+07
403	Spp2	7	7	7	26.1	26.1	26.1	23.136	0	41.031	2213700000	216	221370000	Q8K1I3;H3BLP2;A0A087WSF3	Q8K1I3;H3BLP2	Secreted phosphoprotein 24	3.86833e+06	5.82314e+06	5.00784e+06	3.14577e+06	7.09579e+06	6.45762e+06	4.59324e+06	4.83717e+06	1.911e+06	4.81225e+06	5.47554e+06	5.18407e+06	7.06911e+06	4.94386e+06	4.93778e+06	5.09054e+06	4.11635e+06	5.05775e+06	5.41462e+06	3.24087e+06	5.79027e+06	2.37586e+06	5.35525e+06	6.16873e+06	3.47145e+06	2.92907e+06	3.03203e+06	1.21246e+06	2.75346e+06	2.23901e+06	845182	3.11936e+06	1.85651e+06
404	Treml1	5	5	5	27.8	27.8	27.8	33.522	0	115.35	2006800000	195	222980000	Q8K558	Q8K558	Trem-like transcript 1 protein	5.27591e+06	7.40503e+06	9.99208e+06	6.69433e+06	3.70563e+06	2.08114e+06	2.84976e+06	4.66386e+06	4.62798e+06	2.55204e+06	4.97649e+06	4.51483e+06	8.04572e+06	4.08882e+06	7.04231e+06	1.39048e+06	2.6924e+06	2.72096e+06	2.02546e+06	1.19728e+06	3.25856e+06	4.30343e+06	3.10916e+06	4.51239e+06	1.93994e+06	1.911e+06	1.59224e+06	2.03447e+06	2.98416e+06	1.67102e+06	308980	1.88225e+06	2.51441e+06
405	Ces2a	6	3	3	12.7	7.9	7.9	61.94	0.0021053	4.3464	35015000	12	1667400	Q8QZR3	Q8QZR3	Pyrethroid hydrolase Ces2a	16747.7	174934	285586	16747.7	16747.7	16747.7	16747.7	16747.7	16747.7	172159	16747.7	16747.7	16747.7	16747.7	16747.7	16747.7	16747.7	16747.7	16747.7	16747.7	16747.7	16747.7	16747.7	16747.7	16747.7	16747.7	16747.7	16747.7	16747.7	16747.7	16747.7	16747.7	16747.7
406	Blmh	8	8	8	24.2	24.2	24.2	52.511	0	23.19	104870000	33	4033500	Q8R016;E9PY26;E9Q6V3;E9QA53;E9PZH4	Q8R016;E9PY26	Bleomycin hydrolase	16747.7	16747.7	16747.7	16747.7	16747.7	16747.7	16747.7	16747.7	213351	16747.7	184542	156896	91817.4	74563.9	16747.7	16747.7	16747.7	16747.7	16747.7	197978	16747.7	252177	16747.7	16747.7	16747.7	16747.7	16747.7	16747.7	73375.9	16747.7	16747.7	90066	16747.7
407	Serpina10	27	27	27	57.4	57.4	57.4	51.797	0	323.31	38000000000	1776	1585300000	Q8R121	Q8R121	Protein Z-dependent protease inhibitor	1.29758e+07	2.31217e+07	2.32367e+07	1.80722e+07	8.5485e+06	6.31121e+06	1.7793e+07	1.12827e+07	1.46419e+07	2.14215e+07	2.95498e+07	2.20595e+07	1.9428e+07	1.58333e+07	2.10661e+07	2.59472e+07	1.32005e+07	1.53759e+07	1.86436e+07	1.00323e+07	1.98719e+07	1.43666e+07	2.13291e+07	2.38908e+07	1.5318e+07	1.37391e+07	1.78206e+07	16044269	1.08832e+07	2.24104e+07	1.62136e+07	2.07886e+07	1.98719e+07
408	Ctbs	5	5	5	16.7	16.7	16.7	41.295	0	20.338	192950000	36	10719000	Q8R242	Q8R242	Di-N-acetylchitobiase	16747.7	16747.7	16747.7	16747.7	16747.7	16747.7	16747.7	16747.7	16747.7	16747.7	16747.7	16747.7	16747.7	16747.7	16747.7	16747.7	16747.7	16747.7	16747.7	259083	16747.7	16747.7	16747.7	296277	108120	16747.7	16747.7	16747.7	16747.7	46403.4	16747.7	16747.7	179287
409	C8g	16	16	16	76.2	76.2	76.2	22.508	0	323.31	53400000000	1389	4452300000	Q8VCG4;Q9DAC2	Q8VCG4;Q9DAC2	Complement component C8 gamma chain	104228827	8.19318e+07	8.90579e+07	8.32768e+07	6.74228e+07	6.58121e+07	6.72611e+07	5.6311e+07	5.21863e+07	9.32702e+07	8.20985e+07	6.92514e+07	7.78093e+07	6.3803e+07	8.89309e+07	6.31663e+07	4.5765e+07	5.38534e+07	7.01463e+07	4.04483e+07	8.28793e+07	5.72308e+07	8.12237e+07	6.08451e+07	6.56711e+07	2.72515e+07	2.84345e+07	3.11559e+07	1.94607e+07	4.73424e+07	2.39679e+07	4.17867e+07	3.80804e+07
410	Pglyrp2	16	16	16	49.6	49.6	49.6	57.706	0	293.36	30400000000	1061	1323700000	Q8VCS0	Q8VCS0	N-acetylmuramoyl-L-alanine amidase	1.75701e+07	2.36829e+07	2.98657e+07	1.91646e+07	1.12925e+07	1.53622e+07	2.19834e+07	1.89076e+07	1.93545e+07	2.54197e+07	2.15697e+07	2.28748e+07	2.37311e+07	2.28011e+07	2.23113e+07	1.6913e+07	2.05289e+07	1.98648e+07	2.42419e+07	1.13418e+07	2.71883e+07	2.45325e+07	2.82576e+07	2.20955e+07	2.06521e+07	1.49515e+07	1.27941e+07	1.44354e+07	1.11519e+07	9.80202e+06	1.49454e+07	1.21205e+07	1.23561e+07
411	Gpld1	44	44	44	54.8	54.8	54.8	93.622	0	323.31	172000000000	3573	3993400000	Q8VCU2;O70362;Q5NCE6	Q8VCU2;O70362	Phosphatidylinositol-glycan-specific phospholipase D	6.21417e+07	5.6768e+07	6.43725e+07	5.5905e+07	2.81271e+07	3.00448e+07	6.02983e+07	4.07626e+07	6.09393e+07	4.41034e+07	5.30626e+07	3.73173e+07	4.39198e+07	4.19378e+07	5.29041e+07	4.75776e+07	3.98367e+07	3.65102e+07	3.73173e+07	3.73173e+07	5.32517e+07	3.36247e+07	4.23937e+07	4.85445e+07	6.78437e+07	3.23841e+07	5.00563e+07	5.09725e+07	4.47171e+07	3.90158e+07	2.89585e+07	4.82405e+07	5.46025e+07
412	Cd248	3	3	3	3.9	3.9	3.9	81.812	0.0056926	2.8885	16547000	12	551560	Q91V98	Q91V98	Endosialin	16747.7	16747.7	77621.1	16747.7	16747.7	16747.7	16747.7	16747.7	16747.7	27857.4	16747.7	59746.3	16747.7	37877.7	16747.7	16747.7	16747.7	16747.7	16747.7	16747.7	28312.1	16747.7	16747.7	16747.7	16747.7	16747.7	16747.7	16747.7	16747.7	16747.7	16747.7	16747.7	16747.7
413	haemaglobin alpha 2;Hba	18	18	18	97.9	97.9	97.9	15.112	0	323.31	572000000000	3357	71500000000	Q91VB8;P01942;Q78PA4;A7M7S6;P06467	Q91VB8;P01942	Hemoglobin subunit alpha	1081672548	7.77591e+08	1042290262	1637331417	9.06726e+08	9.21735e+08	1688358328	8.36329e+08	7.05875e+08	889828575	9.26239e+08	7.87273e+08	1383365638	1497398691	969947218	9.89889e+08	9.81435e+08	7.51827e+08	6.91597e+08	8.43233e+08	1076248037	1111573736	9.74584e+08	817256308	1466082271	8.6104e+08	1120005375	1948844580	1083018630	1087359135	6.90899e+08	7.99025e+08	1192996535
414	Masp2	20	20	20	45.4	45.4	45.4	75.516	0	182.52	6634400000	712	184290000	Q91WP0	Q91WP0	Mannan-binding lectin serine protease 2;Mannan-binding lectin serine protease 2 A chain;Mannan-binding lectin serine protease 2 B chain	2.22677e+06	1.92878e+06	2.57117e+06	1.60639e+06	808051	194555	2.1989e+06	1.18978e+06	1.25235e+06	3.32601e+06	3.34484e+06	2.01269e+06	2.60818e+06	1.53061e+06	2.24892e+06	2.42335e+06	1.20916e+06	1.86007e+06	2.80381e+06	1.60164e+06	3.52427e+06	2.21693e+06	2.22527e+06	4.58527e+06	1.85329e+06	1.42709e+06	1.78967e+06	3.69957e+06	881704	2.01541e+06	1.52295e+06	3.5113e+06	2.11847e+06
415	Umod	3	3	3	5.6	5.6	5.6	70.844	0.0023529	7.2127	24333000	9	811090	Q91X17	Q91X17	Uromodulin;Uromodulin, secreted form	16747.7	16747.7	16747.7	16747.7	16747.7	16747.7	16747.7	16747.7	16747.7	16747.7	16747.7	16747.7	16747.7	16747.7	84284.2	16747.7	16747.7	105648	16747.7	16747.7	114139	16747.7	16747.7	99561.3	16747.7	16747.7	16747.7	16747.7	16747.7	16747.7	16747.7	16747.7	16747.7
416	C6	48	48	48	70.1	70.1	70.1	86.63	0	323.31	38900000000	2242	885090000	Q91X70;E9Q6D8;Q8BRY4	Q91X70;E9Q6D8		2.17054e+07	2.12458e+07	1.83158e+07	2.59411e+07	1.6574e+07	1.75231e+07	1.60611e+07	1.20435e+07	7.965e+06	2.34857e+07	2.04208e+07	1.60453e+07	9.68708e+06	8.52205e+06	3.08605e+07	2.18073e+07	3.75191e+06	2.07886e+07	1.49297e+07	4.55704e+06	2.94817e+07	1.32606e+07	9.89496e+06	1.24397e+07	1.59087e+07	4.04206e+06	1.43648e+07	8.89408e+06	6.57371e+06	7.16776e+06	3.63504e+06	9.24356e+06	1.36483e+07
417	Hpx	50	50	50	72.8	72.8	72.8	51.317	0	323.31	3360000000000	23539	125000000000	Q91X72	Q91X72	Hemopexin	1481060296	1819172771	1437953261	1286463437	9.7739e+08	1103376909	1478100353	1641727582	1582693566	2432634919	1700550599	2453351551	1773023090	1712528970	1659044996	1373100267	1680108468	1165978706	1358876578	2188077608	8.58861e+08	2401112206	1667546748	2358224160	1671759212	1935435757	1975403535	1001983974	1358876578	2314324008	2103234021	1675946377	1684245711
418	Cela1	7	7	7	40.2	40.2	40.2	28.9	0	140.97	2228600000	263	202600000	Q91X79	Q91X79	Chymotrypsin-like elastase family member 1	2.41346e+06	3.10642e+06	3.57919e+06	2.14335e+06	1.26162e+06	699814	3.90378e+06	2.35098e+06	3.58195e+06	2.50536e+06	3.00538e+06	3.28095e+06	5.10428e+06	2.44799e+06	3.89652e+06	2.06305e+06	2.43549e+06	2.58846e+06	1.93239e+06	2.08234e+06	5.17011e+06	3.93696e+06	6.15213e+06	5.39351e+06	2.4686e+06	1.70419e+06	2.53105e+06	3.55222e+06	1.63832e+06	1.41753e+06	1.27804e+06	1.69666e+06	2.37787e+06
419	Lrg1	14	14	14	28.7	28.7	28.7	37.431	0	323.31	140000000000	1536	11700000000	Q91XL1	Q91XL1		1.45731e+08	9.58397e+07	112422145	1.17484e+08	1.65435e+08	1.46823e+08	1.15881e+08	1.35159e+08	8.42344e+07	1.43077e+08	1.70423e+08	1.44824e+08	1.25943e+08	1.36282e+08	1.21101e+08	1.24526e+08	9.85028e+07	9.64466e+07	1.40794e+08	9.18294e+07	1.8499e+08	1.47458e+08	1.17344e+08	1.83774e+08	1.48481e+08	1.16276e+08	1.30118e+08	1.12449e+08	8.32768e+07	283774453	1.32018e+08	173125752	1.36941e+08
420	Lrp1	10	10	10	2.3	2.3	2.3	504.74	0	16.537	114070000	55	502510	Q91ZX7;Q3U5J2	Q91ZX7	Prolow-density lipoprotein receptor-related protein 1;Low-density lipoprotein receptor-related protein 1 85 kDa subunit;Low-density lipoprotein receptor-related protein 1 515 kDa subunit;Low-density lipoprotein receptor-related protein 1 intracellular domain	16747.7	16747.7	16747.7	16747.7	16747.7	16747.7	16747.7	28638.6	16747.7	37460.3	16747.7	27799.7	16747.7	16747.7	38599.3	16747.7	16747.7	16747.7	16747.7	16747.7	16747.7	16747.7	16747.7	16747.7	16747.7	16747.7	16747.7	16747.7	16747.7	16747.7	16747.7	28375.8	16747.7
421	Tf;Gm20425	119	119	92	83.5	83.5	71	76.723	0	323.31	12000000000000	49678	292000000000	Q921I1;E9Q035;D3YYR8;F7CJN9;F7BAE9;E9Q939	Q921I1;E9Q035	Serotransferrin	3733671373	3079485267	3523136866	4591380894	3116351607	3241588735	3719215028	3554323735	3276325193	3829639070	3756763027	4856628488	3879826939	3777103231	3615559960	3206395219	4691217456	2847421353	4328729546	3600390926	3704672377	3810222006	4661899892	4776093088	4671731284	4418157976	4451994928	4429509963	4328729546	4738926964	4560216958	3675325044	3704672377
422	Taldo1	4	4	4	13.1	13.1	13.1	37.387	0.0021277	4.6391	69336000	21	4078600	Q93092	Q93092	Transaldolase	16747.7	16747.7	16747.7	16747.7	16747.7	16747.7	16747.7	294444	16747.7	288765	16747.7	185317	59148.9	402591	16747.7	16747.7	16747.7	16747.7	16747.7	722557	1.22857e+06	982127	83914.7	494318	16747.7	16747.7	16747.7	16747.7	16747.7	16747.7	16747.7	16747.7	16747.7
423	2210010C04Rik	1	1	1	4.9	4.9	4.9	26.422	0.0021692	4.9326	88414000	13	8841400	Q9CPN9	Q9CPN9		16747.7	16747.7	16747.7	16747.7	16747.7	16747.7	1.9308e+06	16747.7	1.82473e+06	16747.7	16747.7	16747.7	689963	16747.7	16747.7	16747.7	830851	16747.7	16747.7	16747.7	737190	16747.7	918587	794274	16747.7	16747.7	16747.7	16747.7	16747.7	16747.7	16747.7	16747.7	16747.7
424	Lap3	11	11	11	29.5	29.5	29.5	56.141	0	23.764	382570000	128	13663000	Q9CPY7;A0A0G2JEM7	Q9CPY7	Cytosol aminopeptidase	46535	132165	85285.4	161379	165287	170255	107067	176561	16747.7	16747.7	309900	247830	72292.5	190122	16747.7	16747.7	46724.1	16747.7	89369.3	151902	53929.9	81111.6	28440.3	131211	83731.6	64614.6	151274	267023	65564.7	132280	434501	114606	242431
425	Pcyox1	5	5	5	15	15	15	56.494	0	30.652	230490000	40	9603800	Q9CQF9;A0A0N4SWD3;F7CIP8;D3Z275	Q9CQF9	Prenylcysteine oxidase	281751	16747.7	581335	16747.7	16747.7	16747.7	16747.7	16747.7	16747.7	16747.7	228719	16747.7	364400	16747.7	16747.7	145357	186907	16747.7	116550	16747.7	16747.7	16747.7	173619	197215	16747.7	100279	16747.7	16747.7	16747.7	16747.7	16747.7	16747.7	16747.7
426	Proz	10	10	10	37.8	37.8	37.8	44.304	0	118.68	6464100000	516	380240000	Q9CQW3	Q9CQW3	Vitamin K-dependent protein Z	6.03282e+06	1.05613e+07	1.01911e+07	6.83133e+06	9.39101e+06	7.97446e+06	5.84896e+06	6.52063e+06	2.05021e+06	4.28028e+06	7.29795e+06	4.58614e+06	3.63599e+06	4.54254e+06	4.52363e+06	5.42699e+06	2.99917e+06	5187351	4.32888e+06	1.49166e+06	7.03276e+06	2.46154e+06	4.459e+06	3.51168e+06	5.6228e+06	3.03911e+06	3.78058e+06	495243	3.59877e+06	3.41428e+06	1.79127e+06	2.10163e+06	4.62723e+06
427	Ctrb1	5	5	5	29.3	29.3	29.3	27.822	0	28.197	346240000	38	38471000	Q9CR35	Q9CR35	Chymotrypsinogen B;Chymotrypsin B chain A;Chymotrypsin B chain B;Chymotrypsin B chain C	2.57573e+06	924646	2.83669e+06	541000	469586	16747.7	16747.7	826836	16747.7	573418	16747.7	16747.7	1.48713e+06	16747.7	16747.7	16747.7	16747.7	16747.7	16747.7	301497	16747.7	16747.7	2.485e+06	16747.7	16747.7	16747.7	16747.7	16747.7	16747.7	16747.7	16747.7	16747.7	16747.7
428	Lrrc17	1	1	1	2.5	2.5	2.5	51.851	0.0094162	2.7707	663150000	40	28833000	Q9CXD9	Q9CXD9	Leucine-rich repeat-containing protein 17	408859	491558	395144	405792	16747.7	16747.7	634842	304629	16747.7	644926	830792	399096	16747.7	579122	384441	16747.7	16747.7	16747.7	265164	605015	563005	343358	16747.7	16747.7	16747.7	16747.7	16747.7	16747.7	16747.7	16747.7	16747.7	16747.7	513128
429	Vasn	6	6	6	12.5	12.5	12.5	72.26	0	12.851	324040000	83	12463000	Q9CZT5	Q9CZT5	Vasorin	219987	16747.7	478219	153816	16747.7	80661.5	171271	210194	291162	389589	146716	326702	551292	137543	279452	129969	16747.7	16747.7	156526	62354.8	95468.4	203701	16747.7	167977	16747.7	16747.7	16747.7	16747.7	16747.7	16747.7	16747.7	157478	16747.7
430	Cst6	2	2	2	20.1	20.1	20.1	16.796	0.0021645	4.9272	60054000	5	7506800	Q9D1B1	Q9D1B1		16747.7	16747.7	16747.7	16747.7	16747.7	1.20612e+06	16747.7	1.13881e+06	16747.7	16747.7	2.70507e+06	16747.7	655622	16747.7	16747.7	16747.7	16747.7	16747.7	16747.7	16747.7	16747.7	16747.7	16747.7	16747.7	16747.7	16747.7	16747.7	16747.7	16747.7	16747.7	16747.7	16747.7	16747.7
431	Mfap4	1	1	1	7	7	7	28.937	0	25.417	450490000	61	64356000	Q9D1H9	Q9D1H9	Microfibril-associated glycoprotein 4	729535	16747.7	16747.7	830975	16747.7	16747.7	16747.7	16747.7	944556	16747.7	2.27339e+06	1.57591e+06	1.45366e+06	984199	16747.7	16747.7	16747.7	418251	16747.7	16747.7	760452	1.2923e+06	16747.7	1.45456e+06	16747.7	16747.7	822449	336068	501085	1.07718e+06	1.56199e+06	1.44137e+06	1.01961e+06
432	Obp1a	13	13	10	57.1	57.1	41.1	18.469	0	117.68	2227200000	196	247470000	Q9D3H2	Q9D3H2		5.06864e+06	5.34613e+06	621597	16747.7	1.56602e+06	1.68826e+06	448123	16747.7	16747.7	1.44136e+07	3.61638e+06	958313	2.92001e+07	1.32598e+07	6.01976e+06	1.51068e+07	5.73419e+06	610643	16747.7	16747.7	5.6843e+06	16747.7	16747.7	16747.7	16747.7	16747.7	1.67147e+06	415902	7.48178e+06	228719	16747.7	4.07572e+06	3.45872e+06
433	Cpn2	21	21	21	50.3	50.3	50.3	60.478	0	323.31	140000000000	2591	5818600000	Q9DBB9	Q9DBB9	Carboxypeptidase N subunit 2	8.36882e+07	5.46984e+07	8.56263e+07	6.89129e+07	3.30238e+07	3.38715e+07	6.18042e+07	3.56939e+07	4.74205e+07	5.99922e+07	6.63018e+07	5.1412e+07	6.94454e+07	5.71907e+07	6.11684e+07	5.56182e+07	4.71686e+07	4.55256e+07	4.93617e+07	5.39299e+07	6.31948e+07	5.26759e+07	7.377e+07	6.41146e+07	7.65412e+07	6.09393e+07	8.01611e+07	8.80501e+07	7.01463e+07	5.96806e+07	7.42211e+07	8.76702e+07	8.28793e+07
434	Ica;1300017J02Rik	74	73	73	88.1	88.1	88.1	76.765	0	323.31	296000000000	6581	7801900000	Q9DBD0;D3YY36;F6W4D3;D3Z4X8	Q9DBD0;D3YY36	Inhibitor of carbonic anhydrase	1.26924e+08	1.18894e+08	1.40183e+08	1.34381e+08	7.21207e+07	7.50883e+07	1.11833e+08	1.13605e+08	9.12689e+07	1.36455e+08	1.05543e+08	1.12914e+08	1.31167e+08	125181001	1.03402e+08	9.61784e+07	1.14731e+08	1.0065e+08	1.0188e+08	8.24649e+07	1.43911e+08	1.40488e+08	1.12983e+08	1.31339e+08	1.23317e+08	8.74837e+07	8.93266e+07	9.5293e+07	8.64258e+07	8.20985e+07	7.20584e+07	9.79545e+07	1.02948e+08
435	Plxdc2	4	4	4	8.9	8.9	8.9	59.616	0	8.6787	54045000	22	2844500	Q9DC11;B1AY85;B1AY86	Q9DC11;B1AY85;B1AY86	Plexin domain-containing protein 2	100592	16747.7	16747.7	16747.7	16747.7	16747.7	16747.7	16747.7	16747.7	16747.7	16747.7	16747.7	97112.7	16747.7	69119.3	16747.7	16747.7	16747.7	16747.7	16747.7	16747.7	16747.7	16747.7	16747.7	16747.7	16747.7	16747.7	16747.7	16747.7	16747.7	16747.7	16747.7	16747.7
436	Ppbp	3	3	3	41.6	41.6	41.6	12.251	0	50.613	2224500000	186	370760000	Q9EQI5	Q9EQI5		8.64879e+06	9.66442e+06	1.15554e+07	1.25273e+07	8.98456e+06	1.07722e+07	8.95313e+06	6.01299e+06	6.18759e+06	1.05287e+07	1.52503e+06	2.05631e+06	4.47207e+06	2.20117e+06	7.94789e+06	666123	4.34784e+06	7.12408e+06	16747.7	16747.7	6.8904e+06	6.87858e+06	5.0415e+06	5.29543e+06	9.56643e+06	5.22472e+06	2.05288e+06	4.25277e+06	826836	1.2042e+06	16747.7	834889	3.93814e+06
437	Hrg	24	24	24	36.2	36.2	36.2	59.162	0	271.52	13800000000	1139	598340000	Q9ESB3	Q9ESB3	Histidine-rich glycoprotein	6.27446e+06	9.89563e+06	1.27449e+07	5.94729e+06	26217635	2.68634e+07	9.12015e+06	9.76195e+06	8.37496e+06	7.93283e+06	1.14793e+07	8.45857e+06	1.10506e+07	7.96594e+06	1.01173e+07	7.00403e+06	6.33403e+06	4.55789e+06	4.67837e+06	4.97937e+06	9.41814e+06	7.41511e+06	2.50747e+07	8.98698e+06	2.93551e+06	4.89843e+06	5.1824e+06	7.22447e+06	3.99191e+06	5.91395e+06	2.66987e+06	5.46004e+06	6.40203e+06
438	Cpb2	19	19	19	49.1	49.1	49.1	48.87	0	194.99	10800000000	865	542000000	Q9JHH6	Q9JHH6	Carboxypeptidase B2	6.16058e+06	1.13312e+07	1.23863e+07	7.40503e+06	8.76541e+06	8.59492e+06	5.52085e+06	7.80037e+06	4.46566e+06	7.62498e+06	1.12616e+07	6.94019e+06	8.21985e+06	7.22698e+06	1.19509e+07	7.30782e+06	6.96198e+06	4.64875e+06	7.01033e+06	4.15642e+06	4.01304e+06	5.49803e+06	9.46546e+06	3.70856e+06	4.73821e+06	3.72851e+06	3.63854e+06	5.28062e+06	3.36768e+06	1.10343e+07	4.08177e+06	7.31088e+06	7.45007e+06
439	Cpn1	29	29	29	74.2	74.2	74.2	51.845	0	323.31	66800000000	1802	3338900000	Q9JJN5	Q9JJN5	Carboxypeptidase N catalytic chain	4.06315e+07	4.1111e+07	4.50869e+07	3.9354e+07	2.51954e+07	2.62615e+07	5.21863e+07	3.85797e+07	3.5368e+07	4.66104e+07	5.02407e+07	4.34358e+07	5.76532e+07	3.87581e+07	4.55742e+07	4.60255e+07	4.32114e+07	3.76255e+07	3.43192e+07	2.89501e+07	4.34819e+07	4.21408e+07	4.76317e+07	5.41461e+07	4.15213e+07	3.5368e+07	4.27483e+07	5.25162e+07	3.73173e+07	3.61969e+07	3.96617e+07	3.48455e+07	5.32517e+07
440	Psma6	5	5	5	22.8	22.8	22.8	27.372	0	15.704	226140000	77	13302000	Q9QUM9;E0CXB1;E0CYT2	Q9QUM9;E0CXB1	Proteasome subunit alpha type-6	16747.7	16747.7	16747.7	16747.7	16747.7	16747.7	16747.7	16747.7	107067	258972	119432	171271	340637	16747.7	122251	16747.7	54023.1	16747.7	16747.7	497940	16747.7	16747.7	96145.9	112326	16747.7	291162	56332.9	87706.7	16747.7	155015	298739	101300	100944
441	Dkk3	7	7	7	23.2	23.2	23.2	38.387	0	11.902	109450000	34	6438000	Q9QUN9	Q9QUN9	Dickkopf-related protein 3	16747.7	16747.7	16747.7	16747.7	16747.7	315996	185943	16747.7	16747.7	298911	587891	16747.7	16747.7	16747.7	151416	16747.7	263420	211072	164760	96664.8	16747.7	16747.7	256408	16747.7	16747.7	16747.7	16747.7	16747.7	16747.7	119432	186135	16747.7	16747.7
442	Cd5l	25	25	25	62.5	62.5	62.5	38.862	0	323.31	36000000000	1460	1637200000	Q9QWK4;Q9EQY5	Q9QWK4	CD5 antigen-like	2.29682e+07	1.82437e+07	2.53381e+07	1.769e+07	1.73396e+07	1.868e+07	2.24253e+07	2.01288e+07	1.81999e+07	5.6573e+07	1.92327e+07	2.56766e+07	2.20372e+07	2.47655e+07	1.7985e+07	1.84266e+07	3.32543e+07	2.50552e+07	1.71124e+07	3.01153e+07	3.17469e+07	2.50227e+07	1.97233e+07	2.33861e+07	2.47289e+07	1.27134e+07	1.53279e+07	1.64396e+07	1.22458e+07	2.07886e+07	3.07496e+07	2.4889e+07	2.10612e+07
443	Fetub	28	28	28	71.4	71.4	71.4	42.712	0	323.31	234000000000	4272	13000000000	Q9QXC1;Q6YJU1	Q9QXC1;Q6YJU1	Fetuin-B	1.978e+08	1.72068e+08	2.02818e+08	1.82677e+08	1.97107e+08	1.55132e+08	1.86168e+08	2.15494e+08	1.57359e+08	2.1053e+08	2.21333e+08	1.51693e+08	2.00066e+08	2.12224e+08	1.45754e+08	1.52875e+08	2.14283e+08	1.27279e+08	1.75394e+08	3.58502e+08	2.45342e+08	2.18659e+08	1.4029e+08	2.41915e+08	2.02323e+08	1.33911e+08	1.43841e+08	1.34731e+08	1.48867e+08	1.70423e+08	1.45777e+08	1.35357e+08	166979093
444	Gp5	17	17	17	34.2	34.2	34.2	63.381	0	226.2	7487300000	567	299490000	Q9QZU3;O08742	Q9QZU3;O08742	Platelet glycoprotein V	4.71803e+06	5.2363e+06	6.9031e+06	4.21334e+06	2.14465e+06	1.40775e+06	4.44362e+06	3.25106e+06	3.1537e+06	4.20093e+06	3.2252e+06	4.29092e+06	5.20549e+06	4.4734e+06	4.05243e+06	1.43004e+06	3.81411e+06	2.65507e+06	3.29651e+06	1.64098e+06	4.47909e+06	5.00813e+06	3.91092e+06	4.12823e+06	5.30835e+06	1.46974e+06	2.28506e+06	2.23216e+06	2.26894e+06	2.95633e+06	1.91257e+06	4.00183e+06	4.23695e+06
445	Comp	7	5	5	16.4	13.4	13.4	82.341	0.0021231	4.6372	40998000	11	1205800	Q9R0G6	Q9R0G6	Cartilage oligomeric matrix protein	16747.7	16747.7	91683.6	16747.7	16747.7	327887	16747.7	123452	16747.7	16747.7	16747.7	16747.7	16747.7	16747.7	62238.6	16747.7	16747.7	16747.7	16747.7	16747.7	16747.7	16747.7	16747.7	16747.7	16747.7	16747.7	16747.7	16747.7	16747.7	16747.7	16747.7	16747.7	16747.7
446	Psma4	2	2	2	8.8	8.8	8.8	29.47	0.0021598	4.9112	43788000	15	3368300	Q9R1P0;E9Q0X0;E9PW69	Q9R1P0;E9Q0X0;E9PW69	Proteasome subunit alpha type-4;Proteasome subunit alpha type	16747.7	16747.7	16747.7	16747.7	16747.7	16747.7	16747.7	16747.7	16747.7	16747.7	16747.7	16747.7	16747.7	16747.7	16747.7	16747.7	16747.7	16747.7	16747.7	16747.7	16747.7	16747.7	16747.7	16747.7	173143	16747.7	16747.7	176844	16747.7	16747.7	276907	16747.7	16747.7
447	Cpq	13	13	13	35.1	35.1	35.1	51.813	0	194.28	4670600000	420	259480000	Q9WVJ3	Q9WVJ3	Carboxypeptidase Q	3.47224e+06	4.01256e+06	6.26107e+06	4.13468e+06	1.4016e+06	2.03153e+06	4.1268e+06	2.43878e+06	2.86574e+06	3.77756e+06	3.54975e+06	3.22383e+06	5.47832e+06	2.6436e+06	3.21675e+06	3.7026e+06	1.57632e+06	4.37356e+06	5.07086e+06	2.84547e+06	3.38374e+06	3.73132e+06	1.79277e+06	2.09336e+06	3.0929e+06	3.1537e+06	3.49629e+06	3.19697e+06	935921	2.31794e+06	3.1549e+06	2.71219e+06	4.01304e+06
448	Ggh	2	2	2	9.8	9.8	9.8	35.469	0.0022272	5.4742	109170000	25	6065200	Q9Z0L8	Q9Z0L8	Gamma-glutamyl hydrolase	16747.7	16747.7	221278	16747.7	16747.7	16747.7	16747.7	16747.7	16747.7	249639	16747.7	16747.7	16747.7	16747.7	16747.7	16747.7	16747.7	16747.7	16747.7	16747.7	16747.7	16747.7	16747.7	16747.7	16747.7	16747.7	16747.7	16747.7	16747.7	16747.7	16747.7	16747.7	16747.7
449	Il18bp	1	1	1	6.2	6.2	6.2	21.257	0.0057361	2.9349	89629000	23	8148100	Q9Z0M9	Q9Z0M9	Interleukin-18-binding protein	16747.7	610103	16747.7	416002	16747.7	16747.7	373257	489234	257304	16747.7	300162	604487	520755	16747.7	371228	16747.7	16747.7	16747.7	378789	16747.7	16747.7	261509	16747.7	16747.7	473584	223585	287613	16747.7	16747.7	442047	370832	16747.7	450352
450	Apom	11	11	11	47.4	47.4	47.4	21.273	0	218.89	49500000000	998	7065800000	Q9Z1R3	Q9Z1R3	Apolipoprotein M	1.61221e+08	1.31113e+08	1.71856e+08	1.64886e+08	9.71069e+07	1.10589e+08	1.52018e+08	1.49484e+08	1.16276e+08	1.50013e+08	1.1353e+08	1.32328e+08	1.5741e+08	1.50134e+08	126551745	1.00132e+08	1.36111e+08	1.0573e+08	1.11199e+08	8.51175e+07	1.20141e+08	128714842	1.00437e+08	1.20656e+08	1.05396e+08	8.42344e+07	9.28206e+07	9.9201e+07	1.06783e+08	7.04574e+07	4.19691e+07	8.4624e+07	9.21606e+07
451	Prss1	1	1	1	8.1	8.1	8.1	26.134	0.0022422	5.5637	11400000000	96	1631300000	Q9Z1R9	Q9Z1R9		1.20301e+07	1.42235e+07	1.68914e+07	1.21994e+07	1.54777e+07	1.40996e+07	1.68048e+07	8.35102e+06	1.11833e+08	1.64865e+07	8.45512e+06	1.13621e+07	1.43116e+08	1.35725e+07	16747.7	7.80971e+06	1.24773e+08	1.2981e+07	9.7448e+06	7.25458e+06	9.90412e+07	123488500	1.75189e+07	1.69913e+07	9.7824e+06	5.3301e+06	7.07316e+06	5.493e+06	6.30577e+06	4.03583e+06	4.23852e+06	5.67962e+06	6.27262e+06
452	Minpp1	7	7	7	21	21	21	54.537	0	20.964	124040000	37	5906800	Q9Z2L6	Q9Z2L6	Multiple inositol polyphosphate phosphatase 1	16747.7	16747.7	16747.7	144883	16747.7	16747.7	83010	16747.7	16747.7	16747.7	16747.7	16747.7	261379	16747.7	16747.7	72735.7	16747.7	16747.7	16747.7	16747.7	16747.7	16747.7	16747.7	16747.7	16747.7	16747.7	48295.8	16747.7	16747.7	16747.7	16747.7	16747.7	16747.7
Supplemntary Table 1
[truncated: 40 more columns]
